# Supplementary material
Source: MDPI journal article supplement (https://www.mdpi.com/2071-1050/15/2/1156)
Supplement: s1 [file s1]

## Supplementary Materials

### Test Case 1: IEEE-14 Bus Standard

**Table S1. load flow results GA, 14-bus, and 1 DG**

| Delta  | Pi      | qi      | pg      | Qg      | pl      | ql     | PLs   | Qls    | V     |
|--------|---------|---------|---------|---------|---------|--------|-------|--------|-------|
| 0      | 209.530 | -12.621 | 209.530 | -12.621 | 0       | 0      | 3.500 | 10.686 | 1.060 |
| -0.078 | 18.299  | 27.134  | 39.999  | 39.834  | 21.700  | 12.700 | 2.230 | 9.207  | 1.045 |
| -0.207 | -94.200 | 6.011   | 0       | 25.011  | 94.200  | 19     | 2.128 | 8.969  | 1.010 |
| -0.159 | -47.800 | 3.899   | 0       | 0       | 47.800  | -3.900 | 1.304 | 3.958  | 1.018 |
| -0.136 | -7.600  | -1.599  | 0       | 0       | 7.600   | 1.600  | 0.722 | 2.205  | 1.020 |
| -0.225 | -11.200 | 12.848  | 0       | 20.348  | 11.200  | 7.500  | 0.478 | 1.221  | 1.070 |
| -0.186 | 0       | 0       | 0       | 0       | 0       | 0      | 0.372 | 1.174  | 1.052 |
| -0.154 | 20.848  | 23.307  | 0       | 23.307  | -20.848 | 0      | 0     | 0.965  | 1.090 |
| -0.221 | -29.500 | -16.600 | 0       | 0       | 29.500  | 16.600 | 0     | 0.815  | 1.037 |
| -0.227 | -8.999  | -5.799  | 0       | 0       | 9       | 5.800  | 0     | 4.743  | 1.035 |
| -0.228 | -3.499  | -1.800  | 0       | 0       | 3.500   | 1.800  | 0.086 | 0.181  | 1.049 |
| -0.239 | -6.099  | -1.599  | 0       | 0       | 6.100   | 1.600  | 0.074 | 0.155  | 1.053 |
| -0.239 | -13.499 | -5.799  | 0       | 0       | 13.500  | 5.800  | 0.220 | 0.434  | 1.047 |
| -0.247 | -14.900 | -5      | 0       | 0       | 14.900  | 5      | 0     | 1.449  | 1.023 |
|        |         |         |         |         |         |        | 0     | 1.448  |       |
|        |         |         |         |         |         |        | 0.014 | 0.039  |       |
|        |         |         |         |         |         |        | 0.127 | 0.271  |       |
|        |         |         |         |         |         |        | 0.035 | 0.082  |       |
|        |         |         |         |         |         |        | 0.008 | 0.007  |       |
|        |         |         |         |         |         |        | 0.073 | 0.148  |       |

**Table S2. load flow results PSO, 14-bus, and 1 DG**

| Delta  | Pi      | qi      | pg      | Qg      | pl      | ql     | PLs   | Qls    | V     |
|--------|---------|---------|---------|---------|---------|--------|-------|--------|-------|
| 0      | 209.529 | -12.620 | 209.529 | -12.620 | 0       | 0      | 3.500 | 10.686 | 1.060 |
| -0.078 | 18.299  | 27.134  | 39.999  | 39.834  | 21.700  | 12.700 | 2.230 | 9.207  | 1.045 |
| -0.207 | -94.200 | 6.010   | 0       | 25.010  | 94.200  | 19     | 2.128 | 8.969  | 1.010 |
| -0.159 | -47.799 | 3.900   | 0       | 0       | 47.800  | -3.900 | 1.304 | 3.958  | 1.018 |
| -0.136 | -7.599  | -1.600  | 0       | 0       | 7.600   | 1.600  | 0.722 | 2.205  | 1.020 |
| -0.225 | -11.200 | 12.848  | 0       | 20.348  | 11.200  | 7.500  | 0.478 | 1.221  | 1.070 |
| -0.186 | 0       | 0       | 0       | 0       | 0       | 0      | 0.372 | 1.174  | 1.052 |
| -0.154 | 20.850  | 23.307  | 0       | 23.307  | -20.850 | 0      | 0     | 0.965  | 1.090 |
| -0.221 | -29.500 | -16.600 | 0       | 0       | 29.500  | 16.600 | 0     | 0.815  | 1.037 |
| -0.227 | -9      | -5.799  | 0       | 0       | 9       | 5.800  | 0     | 4.743  | 1.035 |
| -0.228 | -3.500  | -1.799  | 0       | 0       | 3.500   | 1.800  | 0.086 | 0.181  | 1.049 |
| -0.239 | -6.100  | -1.599  | 0       | 0       | 6.100   | 1.600  | 0.074 | 0.155  | 1.053 |

|        |         |        |   |   |        |       |       |       |       |
|--------|---------|--------|---|---|--------|-------|-------|-------|-------|
| -0.239 | -13.499 | -5.800 | 0 | 0 | 13.500 | 5.800 | 0.220 | 0.434 | 1.047 |
| -0.247 | -14.900 | -4.999 | 0 | 0 | 14.900 | 5     | 0     | 1.449 | 1.023 |
|        |         |        |   |   |        |       | 0     | 1.448 |       |
|        |         |        |   |   |        |       | 0.014 | 0.039 |       |
|        |         |        |   |   |        |       | 0.127 | 0.271 |       |
|        |         |        |   |   |        |       | 0.035 | 0.082 |       |
|        |         |        |   |   |        |       | 0.008 | 0.007 |       |
|        |         |        |   |   |        |       | 0.073 | 0.148 |       |

**Table S3. load flow results GRO, 14-bus, and 1 DG**

| Delta  | Pi      | qi      | pg      | Qg      | pl      | ql     | PLs   | Qls    | V     |
|--------|---------|---------|---------|---------|---------|--------|-------|--------|-------|
| 0      | 212.906 | -13.074 | 212.906 | -13.074 | 0       | 0      | 3.612 | 11.030 | 1.060 |
| -0.079 | 18.299  | 28.127  | 39.999  | 40.827  | 21.700  | 12.700 | 2.306 | 9.520  | 1.045 |
| -0.209 | -94.200 | 6.303   | 0       | 25.303  | 94.200  | 19     | 2.157 | 9.090  | 1.010 |
| -0.162 | -47.799 | 3.900   | 0       | 0       | 47.800  | -3.900 | 1.355 | 4.112  | 1.017 |
| -0.139 | -7.600  | -1.599  | 0       | 0       | 7.600   | 1.600  | 0.749 | 2.288  | 1.019 |
| -0.229 | -11.200 | 12.997  | 0       | 20.497  | 11.200  | 7.500  | 0.464 | 1.184  | 1.070 |
| -0.192 | 0       | 0       | 0       | 0       | 0       | 0      | 0.388 | 1.223  | 1.052 |
| -0.165 | 17.771  | 23.405  | 0       | 23.405  | -17.771 | 0      | 0     | 1.085  | 1.090 |
| -0.226 | -29.500 | -16.600 | 0       | 0       | 29.500  | 16.600 | 0     | 0.880  | 1.036 |
| -0.232 | -8.999  | -5.799  | 0       | 0       | 9       | 5.800  | 0     | 4.875  | 1.035 |
| -0.232 | -3.500  | -1.799  | 0       | 0       | 3.500   | 1.800  | 0.089 | 0.187  | 1.048 |
| -0.243 | -6.099  | -1.599  | 0       | 0       | 6.100   | 1.600  | 0.075 | 0.156  | 1.053 |
| -0.243 | -13.500 | -5.800  | 0       | 0       | 13.500  | 5.800  | 0.224 | 0.441  | 1.047 |
| -0.252 | -14.900 | -5      | 0       | 0       | 14.900  | 5      | 0     | 1.280  | 1.023 |
|        |         |         |         |         |         |        | 0     | 1.376  |       |
|        |         |         |         |         |         |        | 0.013 | 0.035  |       |
|        |         |         |         |         |         |        | 0.121 | 0.259  |       |
|        |         |         |         |         |         |        | 0.035 | 0.083  |       |
|        |         |         |         |         |         |        | 0.008 | 0.008  |       |
|        |         |         |         |         |         |        | 0.075 | 0.154  |       |

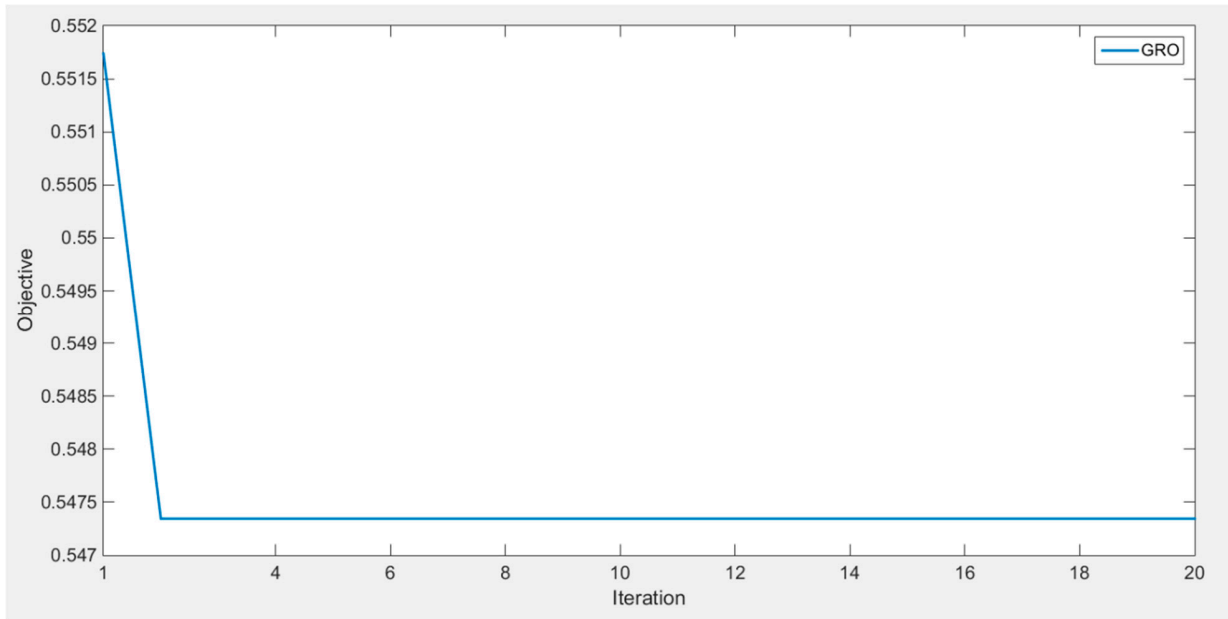

**Figure S1. Algorithm Convergent GRO, 14-bus, and 1DG**

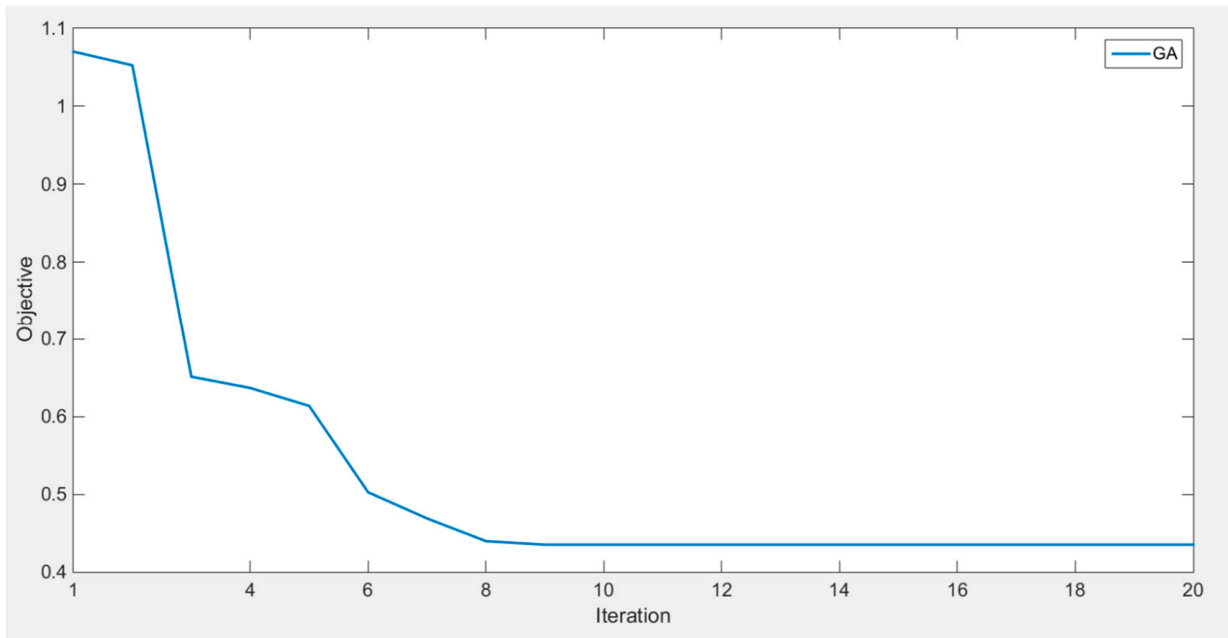

**Figure S2. Algorithm Convergent GA, 14-bus, and 1DG**

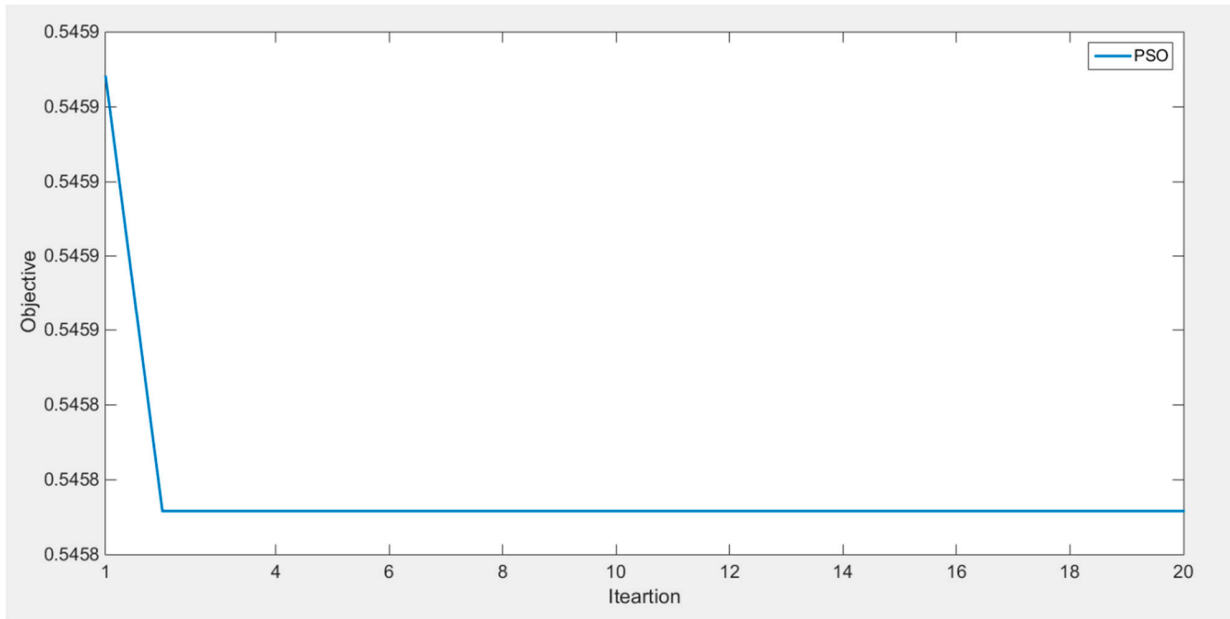

**Figure S3. Algorithm Convergent PSO, 14-bus, and 1DG**

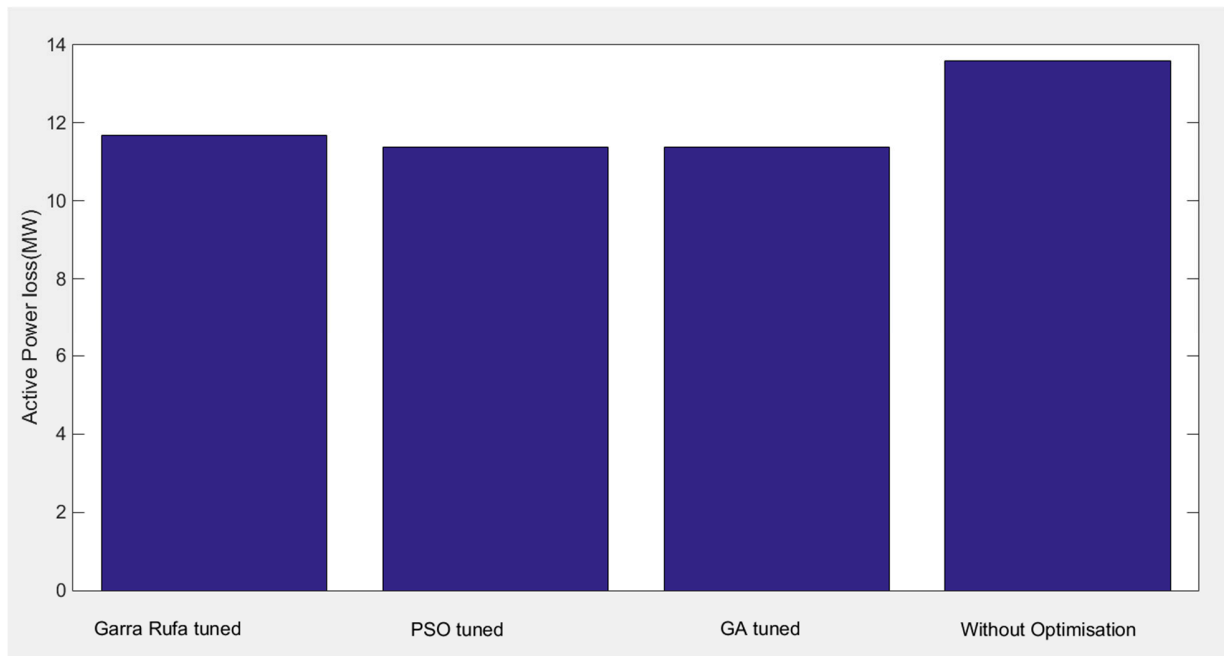

**Figure S4. Active Power Losses 1DG and 14-bus**



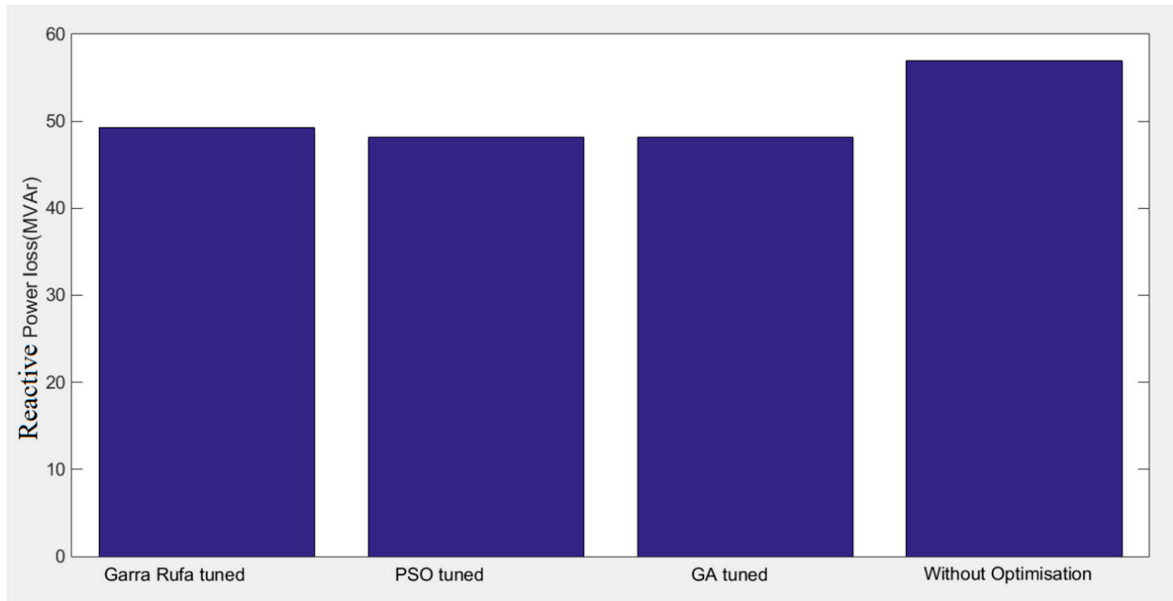

**Figure S5. Reactive Power Losses 1DG and 14-bus**

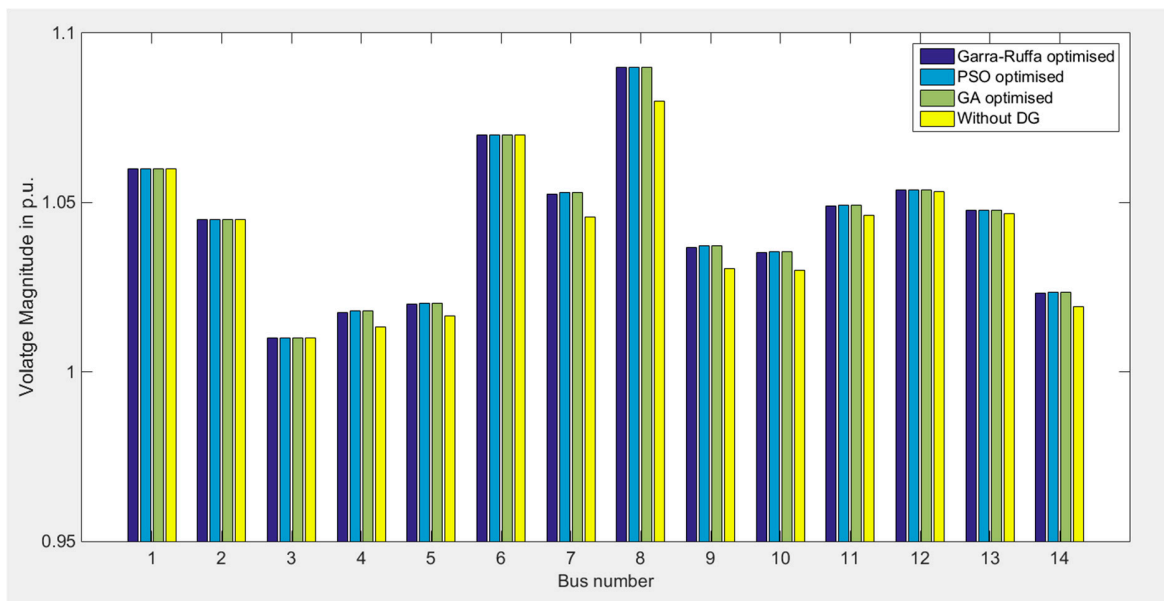

**Figure S6. Voltage Profile 1DG and 14-bus**

**Table S4. load flow results GA, 14-bus, and 2 DG**

| Delta  | Pi      | qi      | pg      | Qg     | pl      | ql     | PLs   | Qls   | V     |
|--------|---------|---------|---------|--------|---------|--------|-------|-------|-------|
| 0      | 186.424 | -7.870  | 186.424 | -7.870 | 0       | 0      | 2.688 | 8.209 | 1.060 |
| -0.068 | 18.300  | 22.507  | 40.00   | 35.207 | 21.700  | 12.700 | 1.870 | 7.723 | 1.045 |
| -0.173 | -73.362 | -2.424  | 0       | 16.575 | 73.362  | 19     | 1.468 | 6.187 | 1.010 |
| -0.144 | -47.800 | 3.899   | 0       | 0      | 47.800  | -3.900 | 1.155 | 3.504 | 1.018 |
| -0.124 | -7.599  | -1.600  | 0       | 0      | 7.600   | 1.600  | 0.670 | 2.047 | 1.020 |
| -0.212 | -11.199 | 12.677  | 0       | 20.177 | 11.200  | 7.500  | 0.190 | 0.486 | 1.070 |
| -0.171 | 20.707  | 0       | 0       | 0      | -20.707 | 0      | 0.285 | 0.901 | 1.053 |
| -0.171 | 0       | 22.723  | 0       | 22.723 | 0       | 0      | 0     | 0.989 | 1.090 |
| -0.206 | -29.499 | -16.599 | 0       | 0      | 29.500  | 16.600 | 0     | 0.838 | 1.037 |
| -0.212 | -9.000  | -5.800  | 0       | 0      | 9       | 5.800  | 0     | 4.655 | 1.035 |
| -0.214 | -3.500  | -1.799  | 0       | 0      | 3.500   | 1.800  | 0.084 | 0.177 | 1.049 |
| -0.226 | -6.100  | -1.600  | 0       | 0      | 6.100   | 1.600  | 0.074 | 0.154 | 1.053 |
| -0.226 | -13.499 | -5.800  | 0       | 0      | 13.500  | 5.800  | 0.218 | 0.430 | 1.047 |
| -0.233 | -14.900 | -5.00   | 0       | 0      | 14.900  | 5      | 0     | 0.765 | 1.023 |
|        |         |         |         |        |         |        | 0     | 1.463 |       |
|        |         |         |         |        |         |        | 0.015 | 0.042 |       |
|        |         |         |         |        |         |        | 0.131 | 0.279 |       |
|        |         |         |         |        |         |        | 0.034 | 0.081 |       |
|        |         |         |         |        |         |        | 0.008 | 0.007 |       |
|        |         |         |         |        |         |        | 0.071 | 0.144 |       |

**Table S5. load flow results PSO, 14-bus, and 2 DG**

| Delta  | Pi      | qi      | pg      | Qg     | pl      | ql     | PLs   | Qls   | V     |
|--------|---------|---------|---------|--------|---------|--------|-------|-------|-------|
| 0      | 187.167 | -7.977  | 187.167 | -7.977 | 0       | 0      | 2.710 | 8.274 | 1.060 |
| -0.068 | 18.300  | 22.720  | 40.000  | 35.420 | 21.700  | 12.700 | 1.886 | 7.786 | 1.045 |
| -0.174 | -73.350 | -2.363  | 0       | 16.636 | 73.350  | 19     | 1.473 | 6.207 | 1.010 |
| -0.144 | -47.800 | 3.900   | 0       | 0      | 47.800  | -3.900 | 1.165 | 3.537 | 1.018 |
| -0.124 | -7.599  | -1.599  | 0       | 0      | 7.600   | 1.600  | 0.676 | 2.065 | 1.020 |
| -0.213 | -11.200 | 12.713  | 0       | 20.213 | 11.200  | 7.500  | 0.188 | 0.480 | 1.070 |
| -0.173 | 20.010  | 0       | 0       | 0      | -20.010 | 0      | 0.288 | 0.910 | 1.053 |
| -0.173 | 0       | 22.775  | 0       | 22.775 | 0       | 0      | 0     | 1.015 | 1.090 |
| -0.208 | -29.499 | -16.600 | 0       | 0      | 29.500  | 16.600 | 0     | 0.853 | 1.037 |
| -0.214 | -8.999  | -5.799  | 0       | 0      | 9       | 5.800  | 0     | 4.684 | 1.035 |
| -0.215 | -3.500  | -1.800  | 0       | 0      | 3.500   | 1.800  | 0.085 | 0.178 | 1.049 |
| -0.227 | -6.099  | -1.600  | 0       | 0      | 6.100   | 1.600  | 0.074 | 0.154 | 1.053 |
| -0.227 | -13.500 | -5.800  | 0       | 0      | 13.500  | 5.800  | 0.219 | 0.431 | 1.047 |
| -0.234 | -14.900 | -4.999  | 0       | 0      | 14.900  | 5      | 0     | 0.769 | 1.023 |
|        |         |         |         |        |         |        | 0     | 1.446 |       |

|  |  |  |  |  |  |  |       |       |  |
|--|--|--|--|--|--|--|-------|-------|--|
|  |  |  |  |  |  |  | 0.015 | 0.041 |  |
|  |  |  |  |  |  |  | 0.130 | 0.276 |  |
|  |  |  |  |  |  |  | 0.034 | 0.081 |  |
|  |  |  |  |  |  |  | 0.008 | 0.007 |  |
|  |  |  |  |  |  |  | 0.071 | 0.146 |  |

**Table S6. load flow results GRO, 14-bus, and 2 DG**

| Delta  | Pi      | qi      | pg      | Qg     | pl      | ql     | PLs   | Qls   | V     |
|--------|---------|---------|---------|--------|---------|--------|-------|-------|-------|
| 0      | 189.460 | -8.565  | 189.460 | -8.565 | 0       | 0      | 2.792 | 8.524 | 1.060 |
| -0.069 | 18.300  | 23.000  | 40.000  | 35.700 | 21.700  | 12.700 | 1.912 | 7.892 | 1.045 |
| -0.178 | -76.818 | -1.137  | 0       | 17.862 | 76.818  | 19     | 1.562 | 6.584 | 1.010 |
| -0.146 | -47.799 | 3.899   | 0       | 0      | 47.800  | -3.900 | 1.168 | 3.544 | 1.018 |
| -0.125 | -7.600  | -1.600  | 0       | 0      | 7.600   | 1.600  | 0.673 | 2.055 | 1.020 |
| -0.213 | -11.200 | 12.651  | 0       | 20.151 | 11.200  | 7.500  | 0.231 | 0.589 | 1.070 |
| -0.172 | 21.432  | 0       | 0       | 0      | -21.432 | 0      | 0.296 | 0.933 | 1.053 |
| -0.172 | 0       | 22.684  | 0       | 22.684 | 0       | 0      | 0     | 0.961 | 1.090 |
| -0.208 | -29.500 | -16.600 | 0       | 0      | 29.500  | 16.600 | 0     | 0.820 | 1.037 |
| -0.213 | -8.999  | -5.799  | 0       | 0      | 9       | 5.800  | 0     | 4.638 | 1.035 |
| -0.215 | -3.500  | -1.800  | 0       | 0      | 3.500   | 1.800  | 0.084 | 0.176 | 1.049 |
| -0.227 | -6.100  | -1.600  | 0       | 0      | 6.100   | 1.600  | 0.073 | 0.153 | 1.053 |
| -0.227 | -13.499 | -5.799  | 0       | 0      | 13.500  | 5.800  | 0.217 | 0.429 | 1.047 |
| -0.234 | -14.899 | -4.999  | 0       | 0      | 14.900  | 5      | 0     | 0.762 | 1.023 |
|        |         |         |         |        |         |        | 0     | 1.478 |       |
|        |         |         |         |        |         |        | 0.016 | 0.042 |       |
|        |         |         |         |        |         |        | 0.132 | 0.280 |       |
|        |         |         |         |        |         |        | 0.034 | 0.081 |       |
|        |         |         |         |        |         |        | 0.008 | 0.007 |       |
|        |         |         |         |        |         |        | 0.070 | 0.144 |       |

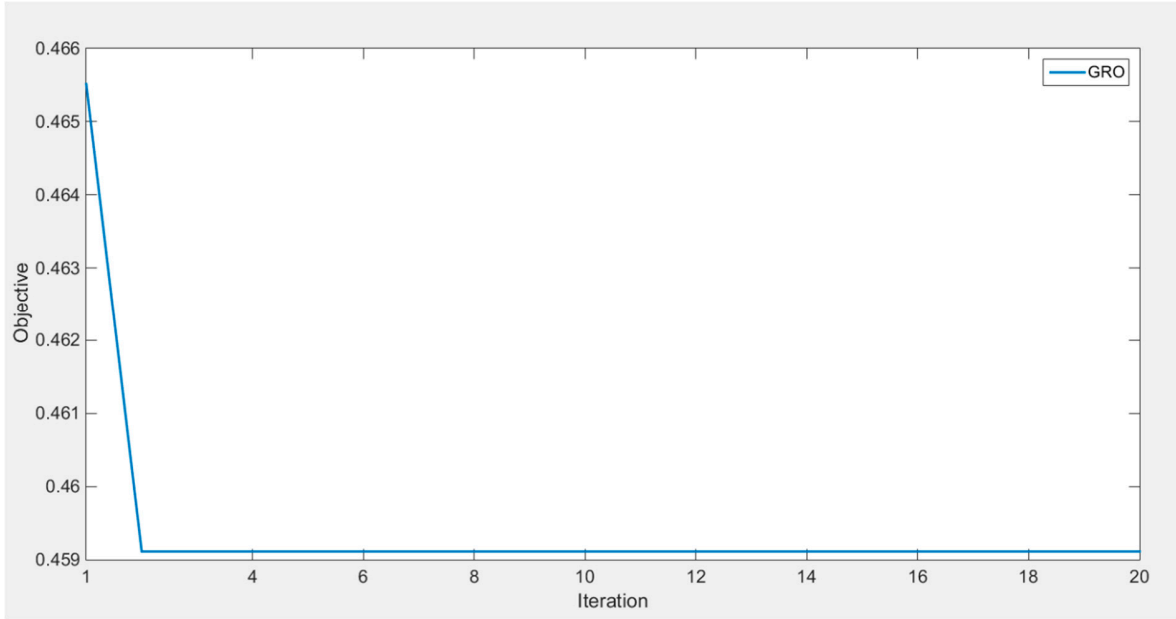

**Figure S7. Algorithm Convergent GRO, 14-bus, and 2DG**

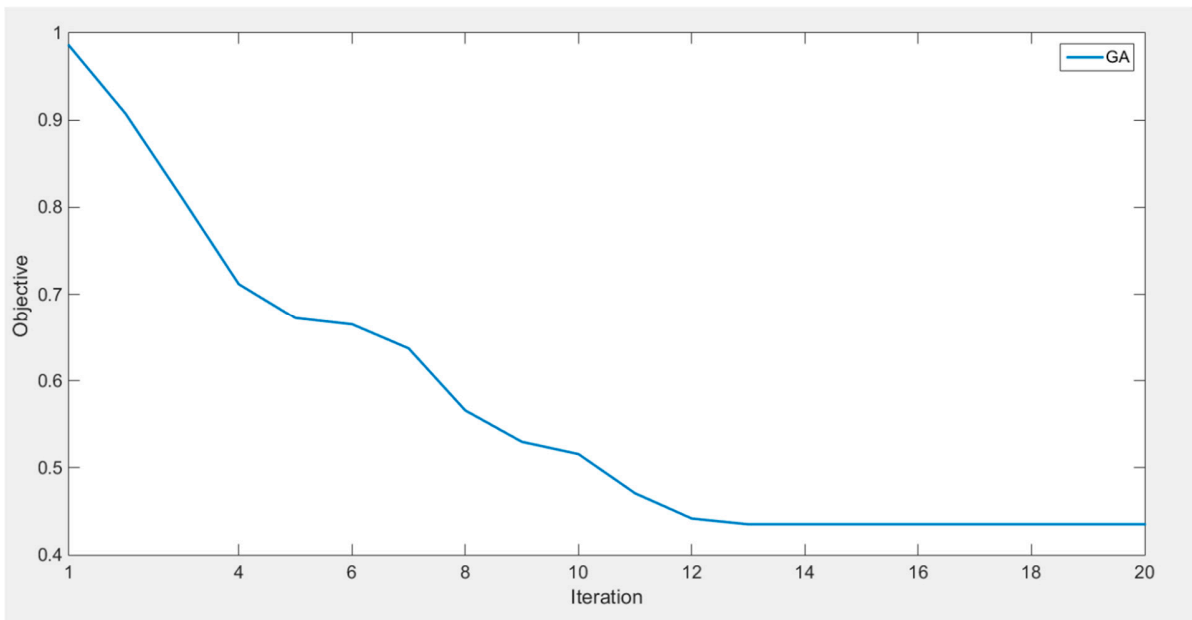

**Figure S8. Algorithm Convergent GA, 14-bus, and 2DG**

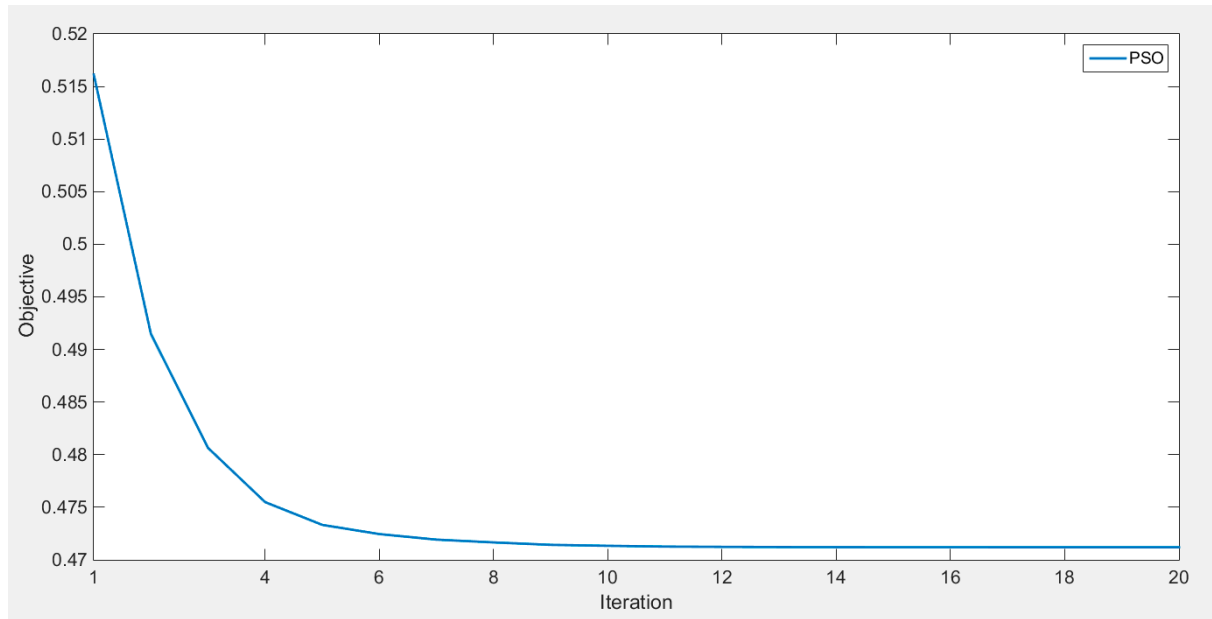

**Figure S9. Algorithm Convergent PSO, 14-bus, and 2DG**

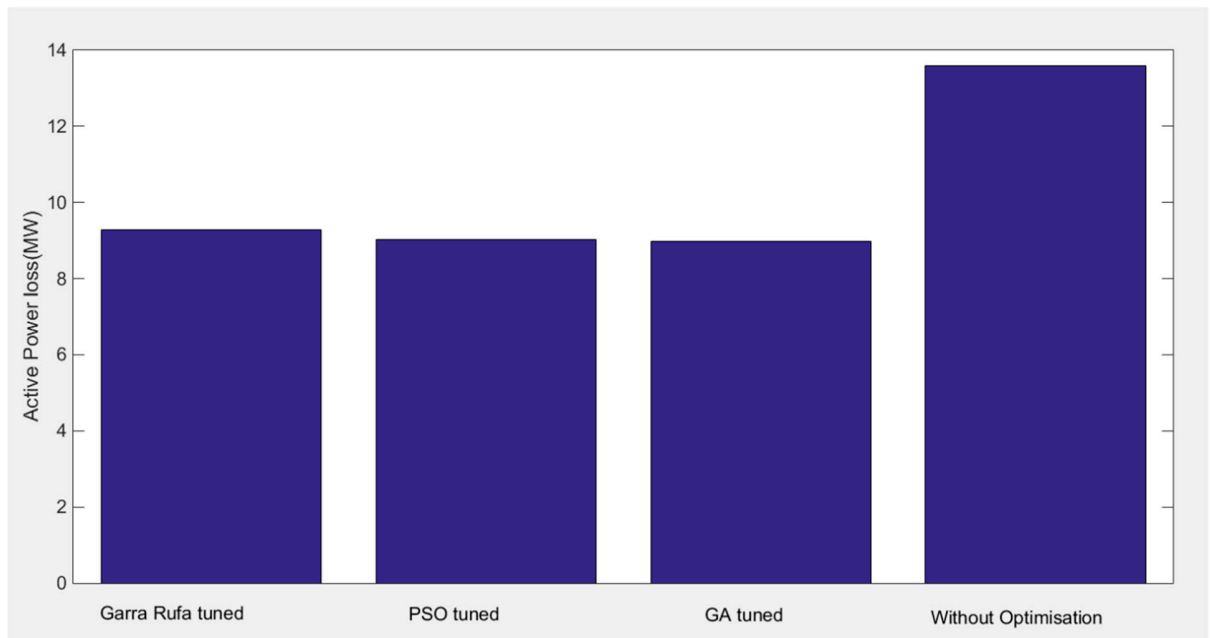

**Figure S10. Active Power Losses 2DG and 14-bus**

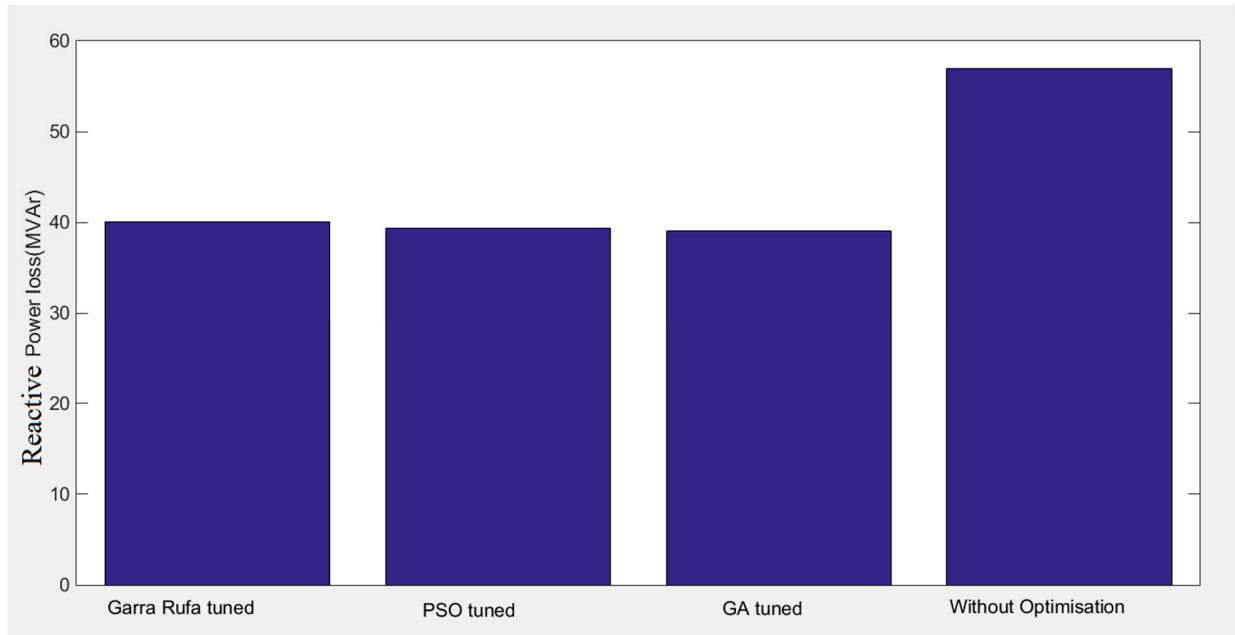

**Figure S11. Reactive Power Losses 2DG and 14-bus**

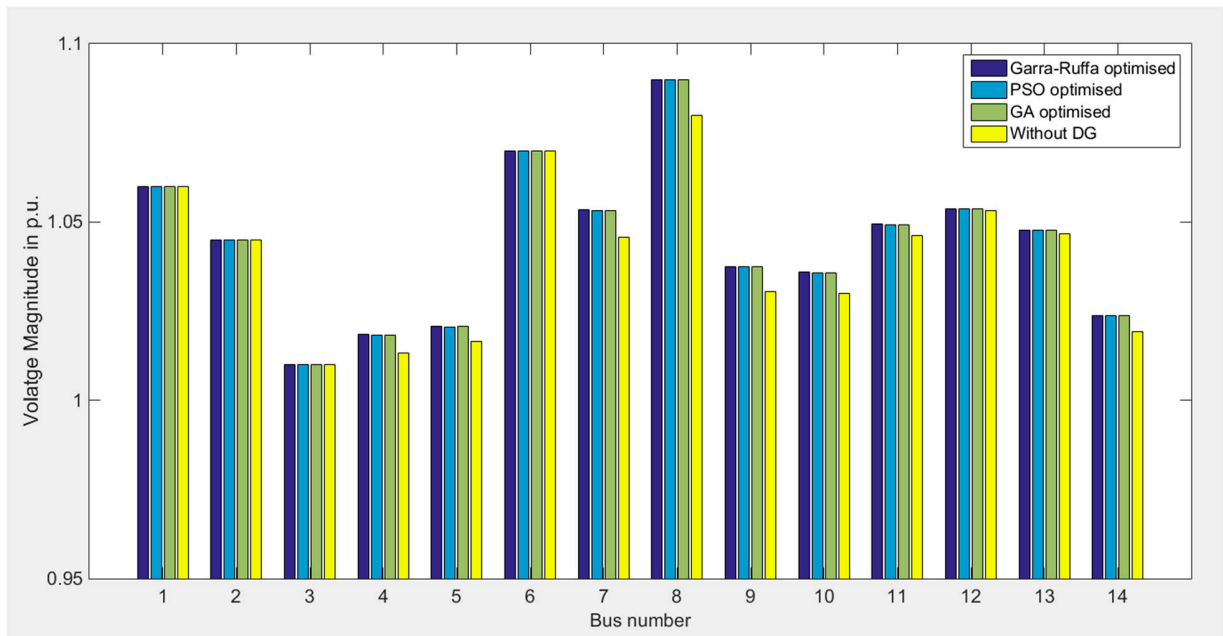

**Figure S12. Voltage Profile 2DG and 14-bus**

**Table S7. load flow results GA, 14-bus, and 3 DG**

| Delta  | Pi      | qi      | pg     | Qg     | pl      | ql     | PLs   | Qls   | V     |
|--------|---------|---------|--------|--------|---------|--------|-------|-------|-------|
| 0      | 82.281  | 13.121  | 82.281 | 13.121 | 0       | 0      | 0.477 | 1.458 | 1.060 |
| -0.025 | 69.089  | -5.659  | 40.000 | 7.040  | -29.089 | 12.700 | 0.486 | 2.009 | 1.045 |
| -0.141 | -94.200 | 3.658   | 0      | 22.658 | 94.200  | 19     | 1.738 | 7.325 | 1.010 |
| -0.082 | -47.800 | 3.899   | 0      | 0      | 47.800  | -3.900 | 0.673 | 2.045 | 1.022 |
| -0.058 | -7.599  | -1.599  | 0      | 0      | 7.600   | 1.600  | 0.245 | 0.749 | 1.028 |
| -0.025 | 32.003  | 0.818   | 0      | 8.318  | -32.003 | 7.500  | 0.730 | 1.865 | 1.070 |
| -0.097 | 0       | 0       | 0      | 0      | 0       | 0      | 0.444 | 1.401 | 1.045 |
| -0.097 | 0       | 20.941  | 0      | 20.941 | 0       | 0      | 0     | 0.375 | 1.080 |
| -0.106 | -29.500 | -16.599 | 0      | 0      | 29.500  | 16.600 | 0     | 0.104 | 1.024 |
| -0.096 | -9.000  | -5.800  | 0      | 0      | 9       | 5.800  | 0     | 1.228 | 1.023 |
| -0.063 | -3.500  | -1.800  | 0      | 0      | 3.500   | 1.800  | 0.462 | 0.968 | 1.041 |
| -0.025 | -6.100  | -1.600  | 0      | 0      | 6.1000  | 1.600  | 0.015 | 0.031 | 1.060 |
| -0.013 | 35.829  | -5.800  | 0      | 0      | -35.829 | 5.800  | 0.062 | 0.123 | 1.066 |
| -0.082 | -14.900 | -5      | 0      | 0      | 14.900  | 5      | 0     | 0.662 | 1.023 |
|        |         |         |        |        |         |        | 0     | 0.474 |       |
|        |         |         |        |        |         |        | 0.036 | 0.096 |       |
|        |         |         |        |        |         |        | 0.084 | 0.178 |       |
|        |         |         |        |        |         |        | 0.281 | 0.658 |       |
|        |         |         |        |        |         |        | 0.052 | 0.047 |       |
|        |         |         |        |        |         |        | 0.810 | 1.650 |       |

**Table S8. load flow results PSO, 14-bus, and 3 DG**

| Delta  | Pi      | qi      | pg     | Qg     | pl      | ql     | PLs   | Qls   | V     |
|--------|---------|---------|--------|--------|---------|--------|-------|-------|-------|
| 0      | 72.975  | 15.126  | 72.975 | 15.126 | 0       | 0      | 0.387 | 1.182 | 1.060 |
| -0.022 | 69.150  | -7.129  | 39.999 | 5.570  | -29.150 | 12.700 | 0.391 | 1.615 | 1.045 |
| -0.135 | -94.200 | 3.378   | 0      | 22.378 | 94.200  | 19     | 1.681 | 7.083 | 1.010 |
| -0.075 | -47.800 | 3.899   | 0      | 0      | 47.800  | -3.900 | 0.593 | 1.800 | 1.023 |
| -0.051 | -7.600  | -1.600  | 0      | 0      | 7.600   | 1.600  | 0.196 | 0.599 | 1.029 |
| -0.005 | 39.650  | 0.156   | 0      | 7.656  | -39.650 | 7.500  | 0.776 | 1.981 | 1.070 |
| -0.087 | 0       | 0       | 0      | 0      | 0       | 0      | 0.450 | 1.420 | 1.045 |
| -0.087 | 0       | 21.153  | 0      | 21.153 | 0       | 0      | 0     | 0.307 | 1.080 |
| -0.093 | -29.500 | -16.600 | 0      | 0      | 29.500  | 16.600 | 0     | 0.062 | 1.023 |
| -0.082 | -9.000  | -5.800  | 0      | 0      | 9       | 5.800  | 0     | 1.685 | 1.022 |
| -0.046 | -3.500  | -1.799  | 0      | 0      | 3.500   | 1.800  | 0.527 | 1.104 | 1.040 |
| -0.004 | -6.100  | -1.600  | 0      | 0      | 6.100   | 1.600  | 0.014 | 0.030 | 1.060 |
| 0.0075 | 37.350  | -5.799  | 0      | 0      | -37.350 | 5.800  | 0.062 | 0.123 | 1.066 |
| -0.066 | -14.900 | -5      | 0      | 0      | 14.900  | 5      | 0     | 0.675 | 1.022 |

|  |  |  |  |  |  |  |       |       |  |
|--|--|--|--|--|--|--|-------|-------|--|
|  |  |  |  |  |  |  | 0     | 0.479 |  |
|  |  |  |  |  |  |  | 0.048 | 0.128 |  |
|  |  |  |  |  |  |  | 0.111 | 0.237 |  |
|  |  |  |  |  |  |  | 0.329 | 0.772 |  |
|  |  |  |  |  |  |  | 0.052 | 0.047 |  |
|  |  |  |  |  |  |  | 0.901 | 1.835 |  |

**Table S9. load flow results GRO, 14-bus, and 3 DG**

| Delta  | Pi      | qi      | pg     | Qg     | pl      | ql     | PLs   | Qls   | V     |
|--------|---------|---------|--------|--------|---------|--------|-------|-------|-------|
| 0      | 91.660  | 10.843  | 91.660 | 10.843 | 0       | 0      | 0.600 | 1.834 | 1.060 |
| -0.029 | 64.474  | -3.293  | 39.999 | 9.406  | -24.474 | 12.700 | 0.562 | 2.323 | 1.045 |
| -0.146 | -94.199 | 3.83    | 0      | 22.836 | 94.200  | 19     | 1.762 | 7.423 | 1.010 |
| -0.088 | -47.800 | 3.899   | 0      | 0      | 47.800  | -3.900 | 0.707 | 2.145 | 1.022 |
| -0.064 | -7.599  | -1.599  | 0      | 0      | 7.600   | 1.600  | 0.264 | 0.806 | 1.028 |
| -0.037 | 30.725  | 1.084   | 0      | 8.584  | -30.725 | 7.500  | 0.713 | 1.821 | 1.070 |
| -0.105 | 0       | 0       | 0      | 0      | 0       | 0      | 0.449 | 1.416 | 1.045 |
| -0.105 | 0       | 20.885  | 0      | 20.885 | 0       | 0      | 0     | 0.416 | 1.080 |
| -0.114 | -29.500 | -16.600 | 0      | 0      | 29.500  | 16.600 | 0     | 0.131 | 1.024 |
| -0.105 | -9.000  | -5.799  | 0      | 0      | 9       | 5.800  | 0     | 1.067 | 1.024 |
| -0.073 | -3.500  | -1.800  | 0      | 0      | 3.500   | 1.800  | 0.437 | 0.915 | 1.041 |
| -0.038 | -6.099  | -1.600  | 0      | 0      | 6.100   | 1.600  | 0.016 | 0.033 | 1.059 |
| -0.026 | 32.454  | -5.800  | 0      | 0      | -32.454 | 5.800  | 0.048 | 0.094 | 1.065 |
| -0.093 | -14.900 | -5.000  | 0      | 0      | 14.900  | 5      | 0     | 0.658 | 1.022 |
|        |         |         |        |        |         |        | 0     | 0.478 |       |
|        |         |         |        |        |         |        | 0.031 | 0.084 |       |
|        |         |         |        |        |         |        | 0.067 | 0.144 |       |
|        |         |         |        |        |         |        | 0.262 | 0.614 |       |
|        |         |         |        |        |         |        | 0.042 | 0.038 |       |
|        |         |         |        |        |         |        | 0.748 | 1.524 |       |



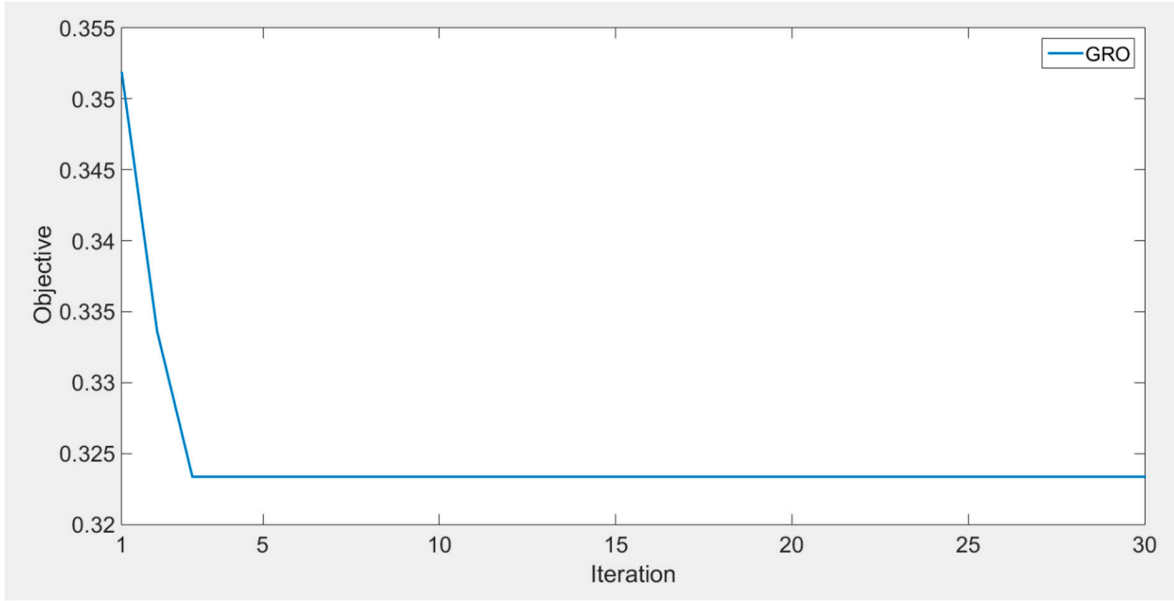

**Figure S13. Algorithm Convergent GRO, 14-bus, and 3DG**

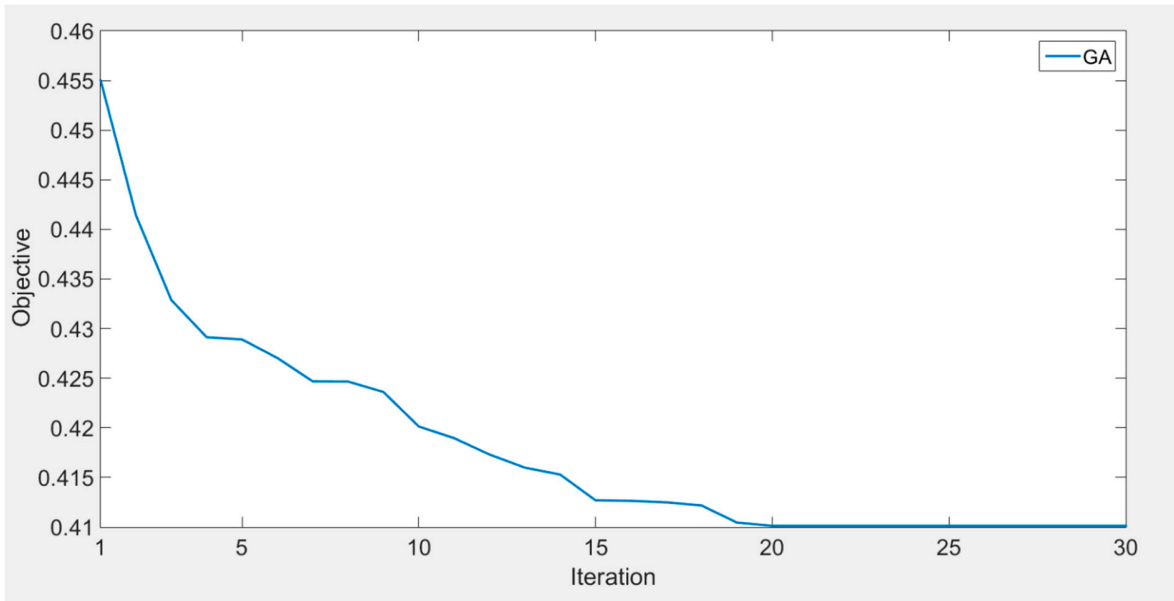

**Figure S14. Algorithm Convergent GA, 14-bus, and 3DG**

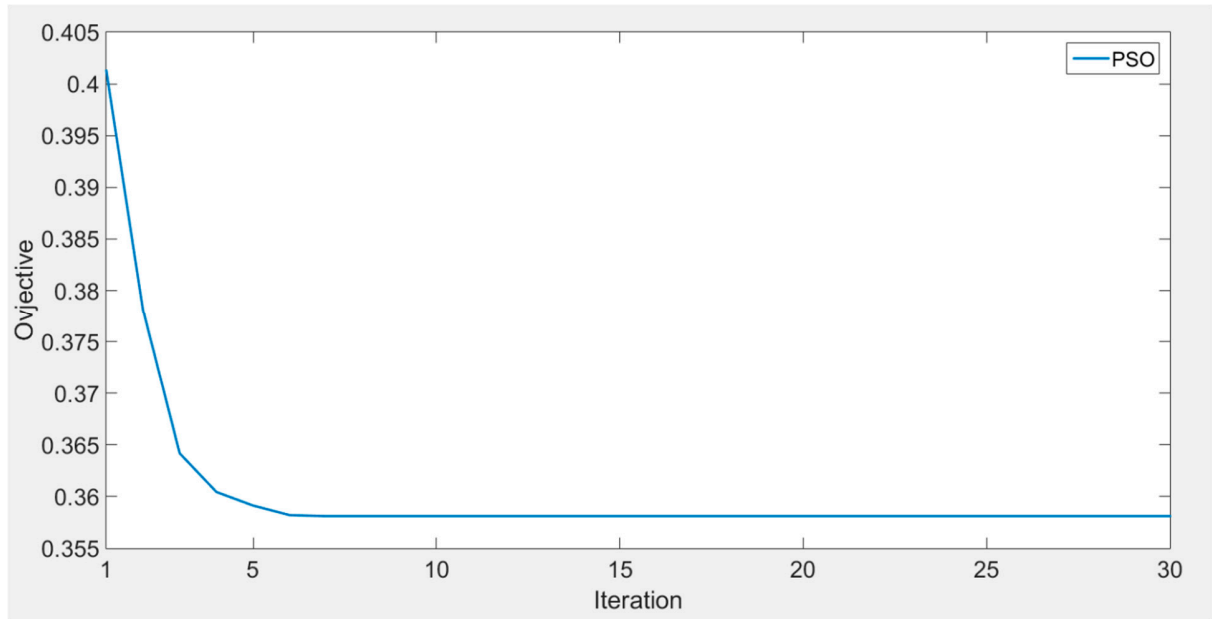

**Figure S15. Algorithm Convergent PSO, 14-bus, and 3DG**

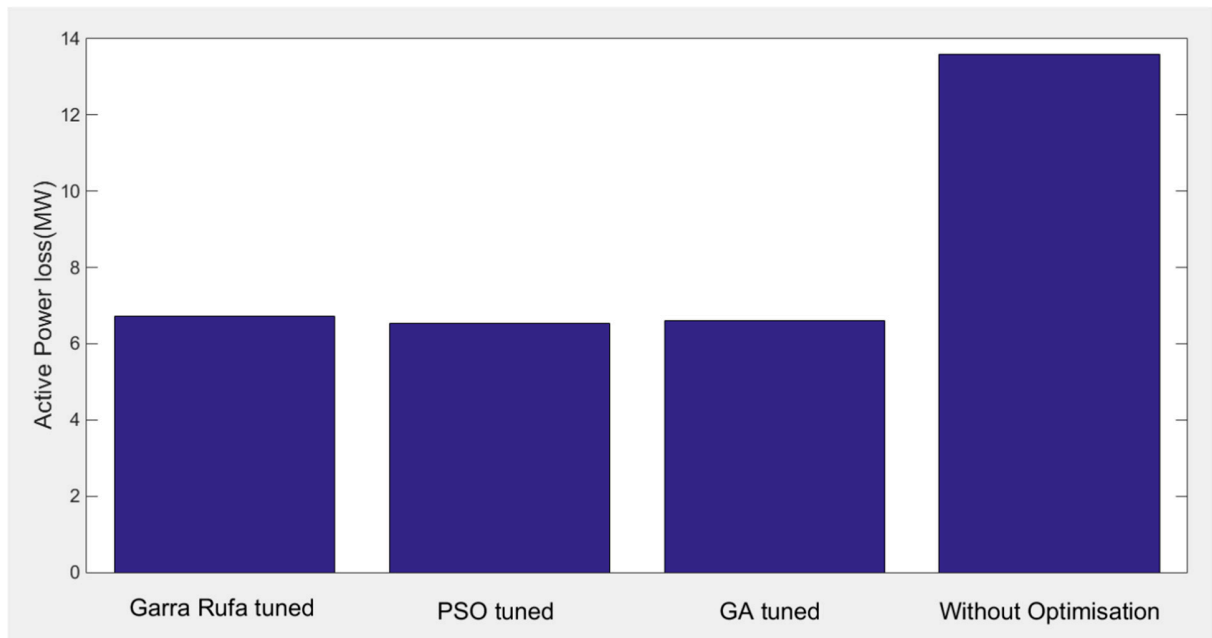

**Figure S16. Active Power Losses 3DG and 14-bus**

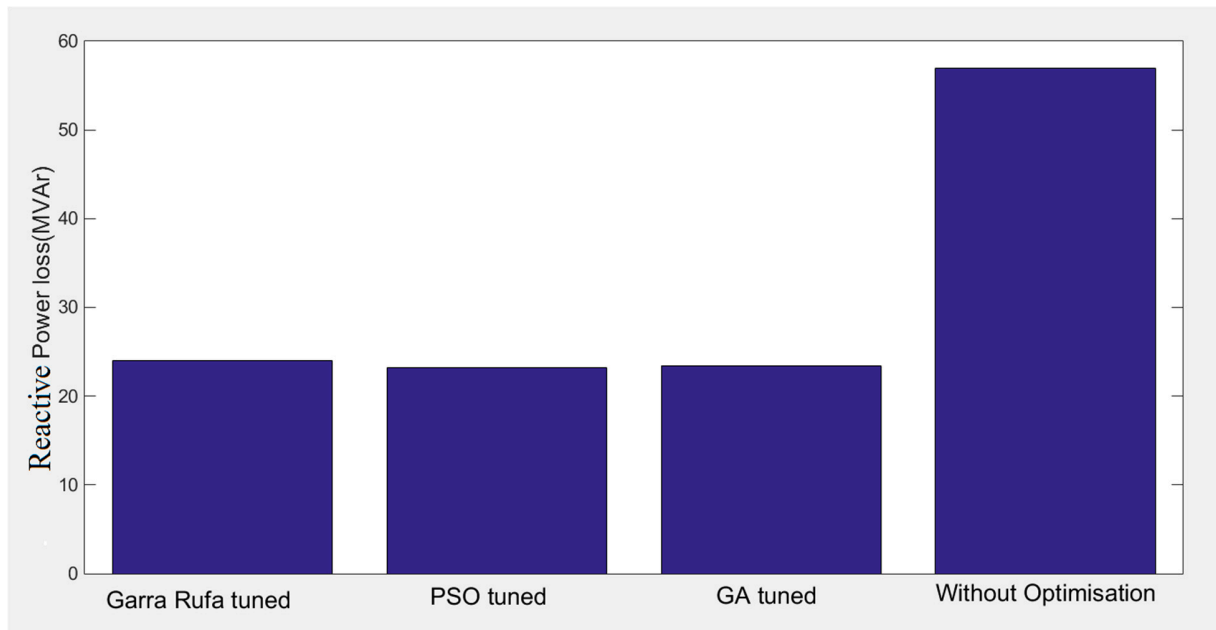

**Figure S17. Reactive Power Losses 3DG and 14-bus**

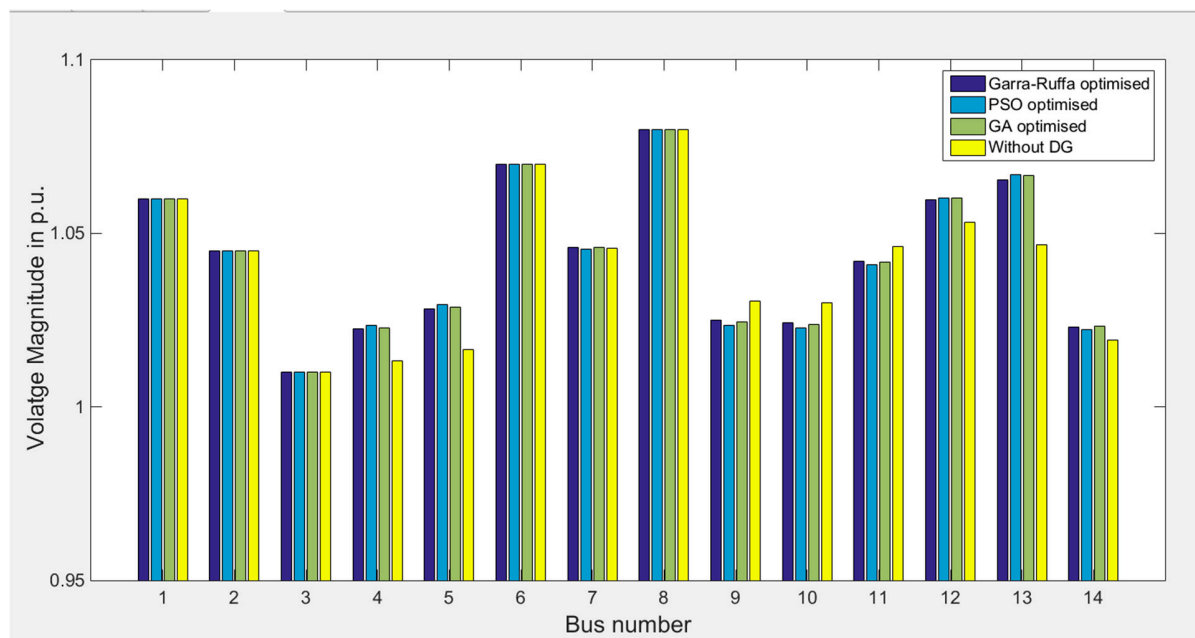

**Figure S18. Voltage Profile 3DG and 14-bus**

**Table S10. load flow results GA, 14-bus, and 4 DG**

| Delta  | Pi      | qi      | pg      | Qg     | pl      | ql     | PLs   | Qls   | V     |
|--------|---------|---------|---------|--------|---------|--------|-------|-------|-------|
| 0      | 165.397 | -4.563  | 165.397 | -4.563 | 0       | 0      | 2.063 | 6.301 | 1.060 |
| -0.059 | 39.149  | 13.176  | 40.000  | 25.876 | 0.850   | 12.700 | 1.538 | 6.349 | 1.045 |
| -0.183 | -94.200 | 4.365   | 0       | 23.365 | 94.200  | 19     | 1.996 | 8.411 | 1.010 |
| -0.133 | -47.799 | 3.900   | 0       | 0      | 47.800  | -3.900 | 1.081 | 3.282 | 1.021 |
| -0.112 | -7.600  | -1.599  | 0       | 0      | 7.600   | 1.600  | 0.587 | 1.793 | 1.023 |
| -0.177 | -11.200 | 9.901   | 0       | 17.401 | 11.200  | 7.500  | 0.548 | 1.399 | 1.070 |
| -0.148 | 0       | 0       | 0       | 0      | 0       | 0      | 0.322 | 1.017 | 1.054 |
| -0.116 | 20.777  | 22.302  | 0       | 22.302 | -20.777 | 0      | 0     | 0.662 | 1.090 |
| -0.177 | -29.500 | -16.600 | 0       | 0      | 29.500  | 16.600 | 0     | 0.432 | 1.038 |
| -0.175 | -9      | -5.799  | 0       | 0      | 9       | 5.800  | 0     | 2.899 | 1.039 |
| -0.160 | 17.325  | -1.800  | 0       | 0      | -17.325 | 1.800  | 0.086 | 0.180 | 1.059 |
| -0.191 | -6.100  | -1.600  | 0       | 0      | 6.100   | 1.600  | 0.075 | 0.156 | 1.053 |
| -0.191 | -13.499 | -5.799  | 0       | 0      | 13.500  | 5.800  | 0.223 | 0.440 | 1.047 |
| -0.201 | -14.900 | -5.000  | 0       | 0      | 14.900  | 5      | 0     | 1.377 | 1.024 |
|        |         |         |         |        |         |        | 0     | 1.050 |       |
|        |         |         |         |        |         |        | 0.001 | 0.004 |       |
|        |         |         |         |        |         |        | 0.117 | 0.250 |       |
|        |         |         |         |        |         |        | 0.124 | 0.291 |       |
|        |         |         |         |        |         |        | 0.008 | 0.007 |       |
|        |         |         |         |        |         |        | 0.072 | 0.148 |       |

**Table S11. load flow results PSO, 14-bus, and 4 DG**

| Delta  | Pi      | qi      | pg      | Qg     | pl      | ql     | PLs   | Qls   | V     |
|--------|---------|---------|---------|--------|---------|--------|-------|-------|-------|
| 0      | 182.258 | -8.255  | 182.258 | -8.255 | 0       | 0      | 2.611 | 7.973 | 1.060 |
| -0.067 | 26.348  | 18.906  | 39.999  | 31.606 | 13.651  | 12.700 | 1.725 | 7.124 | 1.045 |
| -0.192 | -94.200 | 4.676   | 0       | 23.676 | 94.200  | 19     | 2.005 | 8.448 | 1.010 |
| -0.141 | -47.800 | 3.900   | 0       | 0      | 47.800  | -3.900 | 1.094 | 3.320 | 1.020 |
| -0.119 | -7.599  | -1.599  | 0       | 0      | 7.600   | 1.600  | 0.578 | 1.766 | 1.023 |
| -0.186 | -11.200 | 10.007  | 0       | 17.507 | 11.200  | 7.500  | 0.544 | 1.390 | 1.070 |
| -0.160 | 0       | 0       | 0       | 0      | 0       | 0      | 0.352 | 1.111 | 1.054 |
| -0.133 | 17.471  | 22.400  | 0       | 22.400 | -17.471 | 0      | 0     | 0.739 | 1.090 |
| -0.187 | -29.500 | -16.599 | 0       | 0      | 29.500  | 16.600 | 0     | 0.479 | 1.038 |
| -0.185 | -9.000  | -5.800  | 0       | 0      | 9       | 5.800  | 0     | 3.013 | 1.039 |
| -0.169 | 17.350  | -1.800  | 0       | 0      | -17.350 | 1.800  | 0.081 | 0.169 | 1.059 |
| -0.200 | -6.099  | -1.599  | 0       | 0      | 6.100   | 1.600  | 0.075 | 0.157 | 1.053 |
| -0.201 | -13.500 | -5.800  | 0       | 0      | 13.500  | 5.800  | 0.228 | 0.449 | 1.047 |
| -0.211 | -14.900 | -5.000  | 0       | 0      | 14.900  | 5      | 0     | 1.196 | 1.024 |
|        |         |         |         |        |         |        | 0     | 0.986 |       |

|  |  |  |  |  |  |  |       |       |  |
|--|--|--|--|--|--|--|-------|-------|--|
|  |  |  |  |  |  |  | 0.002 | 0.005 |  |
|  |  |  |  |  |  |  | 0.111 | 0.237 |  |
|  |  |  |  |  |  |  | 0.131 | 0.307 |  |
|  |  |  |  |  |  |  | 0.008 | 0.008 |  |
|  |  |  |  |  |  |  | 0.076 | 0.156 |  |

**Table S12. load flow results GRO, 14-bus, and 4 DG**

| Delta  | Pi      | qi      | pg      | Qg     | pl      | ql     | PLs   | Qls   | V     |
|--------|---------|---------|---------|--------|---------|--------|-------|-------|-------|
| 0      | 158.989 | -3.971  | 158.989 | -3.971 | 0       | 0      | 1.944 | 5.935 | 1.060 |
| -0.057 | 35.434  | 12.093  | 39.999  | 24.793 | 4.565   | 12.700 | 1.367 | 5.646 | 1.045 |
| -0.179 | -94.200 | 3.820   | 0       | 22.820 | 94.200  | 19     | 1.923 | 8.104 | 1.010 |
| -0.127 | -47.800 | 3.899   | 0       | 0      | 47.800  | -3.900 | 0.962 | 2.918 | 1.022 |
| -0.105 | -7.599  | -1.600  | 0       | 0      | 7.600   | 1.600  | 0.489 | 1.494 | 1.024 |
| -0.154 | -11.200 | 8.548   | 0       | 16.048 | 11.200  | 7.500  | 0.593 | 1.514 | 1.070 |
| -0.141 | 0       | 0       | 0       | 0      | 0       | 0      | 0.339 | 1.070 | 1.054 |
| -0.120 | 13.558  | 21.928  | 0       | 21.928 | -13.558 | 0      | 0     | 0.622 | 1.090 |
| -0.162 | -29.500 | -16.600 | 0       | 0      | 29.500  | 16.600 | 0     | 0.287 | 1.038 |
| -0.153 | -9.000  | -5.800  | 0       | 0      | 9       | 5.800  | 0     | 1.998 | 1.041 |
| -0.123 | 34.521  | -1.799  | 0       | 0      | -34.521 | 1.800  | 0.225 | 0.472 | 1.067 |
| -0.169 | -6.100  | -1.599  | 0       | 0      | 6.100   | 1.600  | 0.077 | 0.161 | 1.053 |
| -0.170 | -13.500 | -5.800  | 0       | 0      | 13.500  | 5.800  | 0.236 | 0.465 | 1.047 |
| -0.183 | -14.899 | -5      | 0       | 0      | 14.900  | 5      | 0     | 0.985 | 1.024 |
|        |         |         |         |        |         |        | 0     | 0.684 |       |
|        |         |         |         |        |         |        | 0.034 | 0.091 |       |
|        |         |         |         |        |         |        | 0.097 | 0.208 |       |
|        |         |         |         |        |         |        | 0.319 | 0.748 |       |
|        |         |         |         |        |         |        | 0.009 | 0.008 |       |
|        |         |         |         |        |         |        | 0.083 | 0.170 |       |

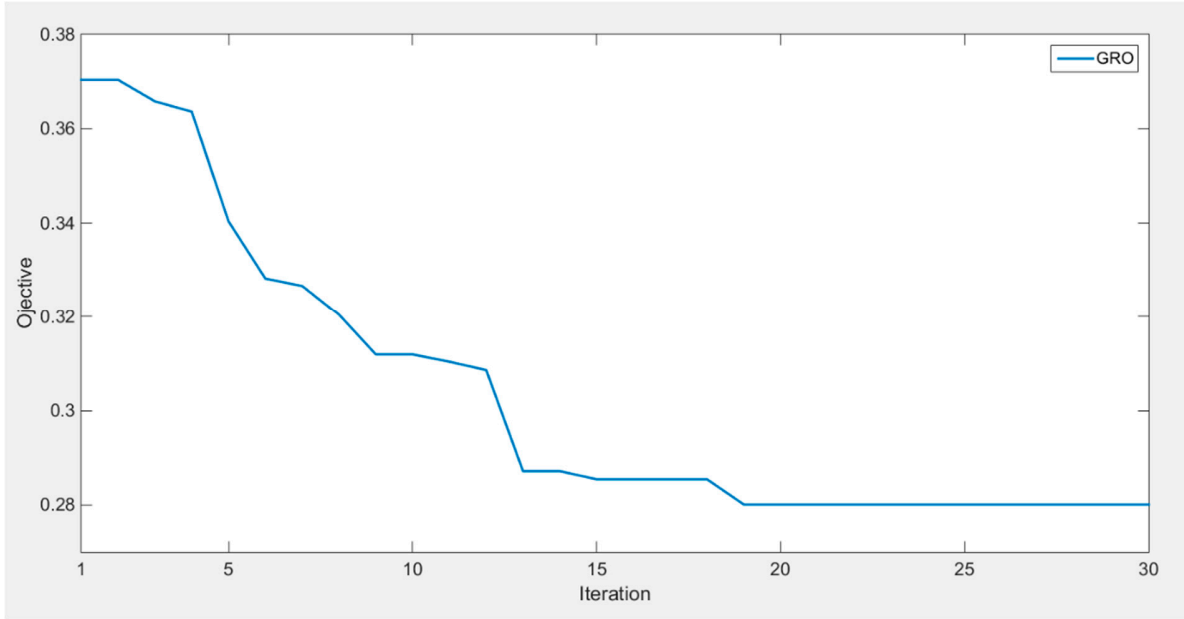

**Figure S19. Algorithm Convergent GRO, 14-bus, and 4DG**

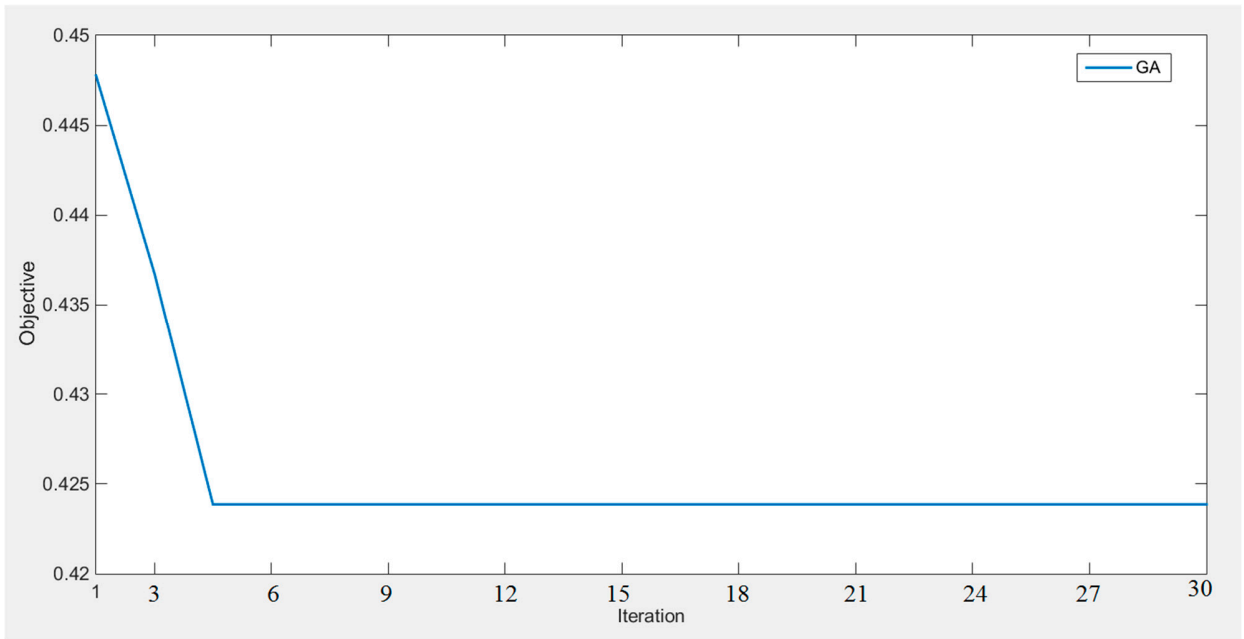

**Figure S20. Algorithm Convergent GA, 14-bus, and 4DG**

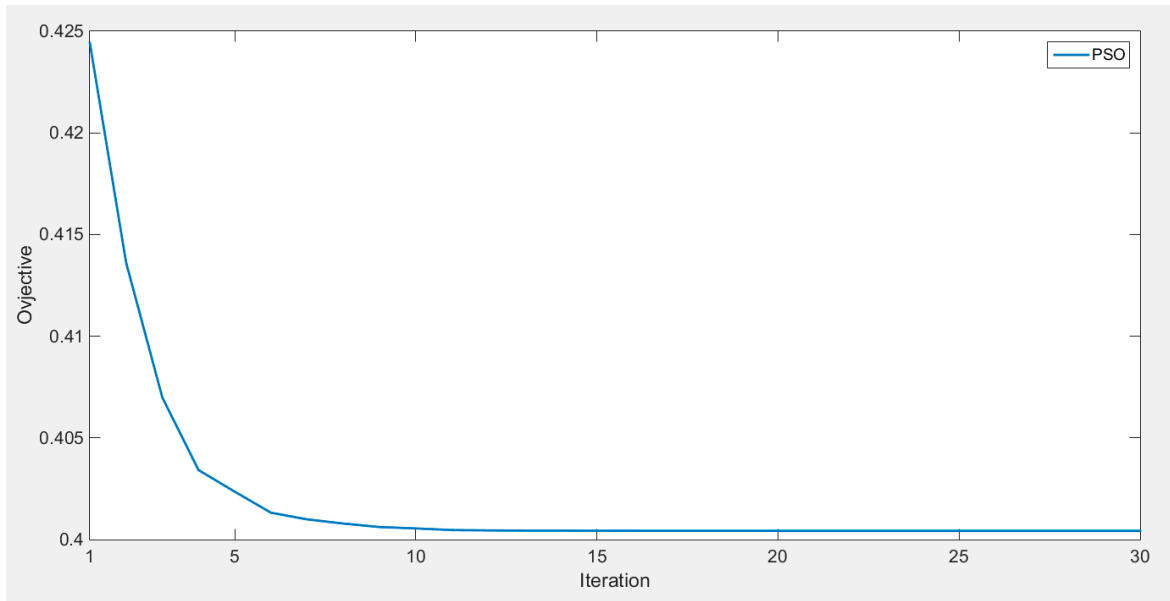

**Figure S21. Algorithm Convergent PSO, 14-bus, and 4DG**

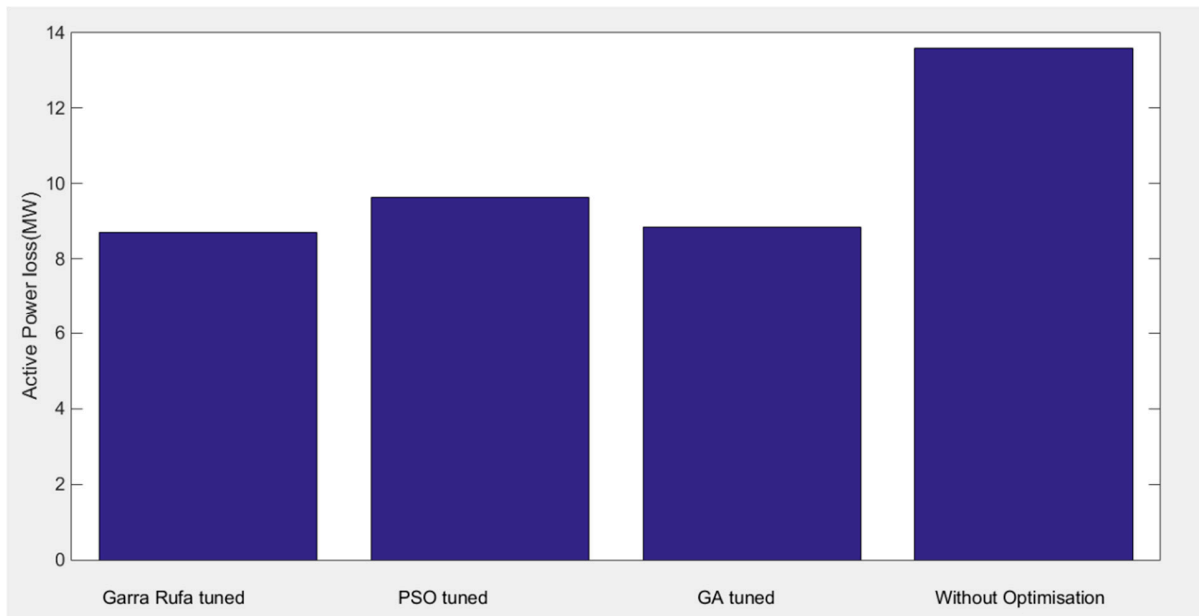

**Figure S22. Active Power Losses 4DG and 14-bus**

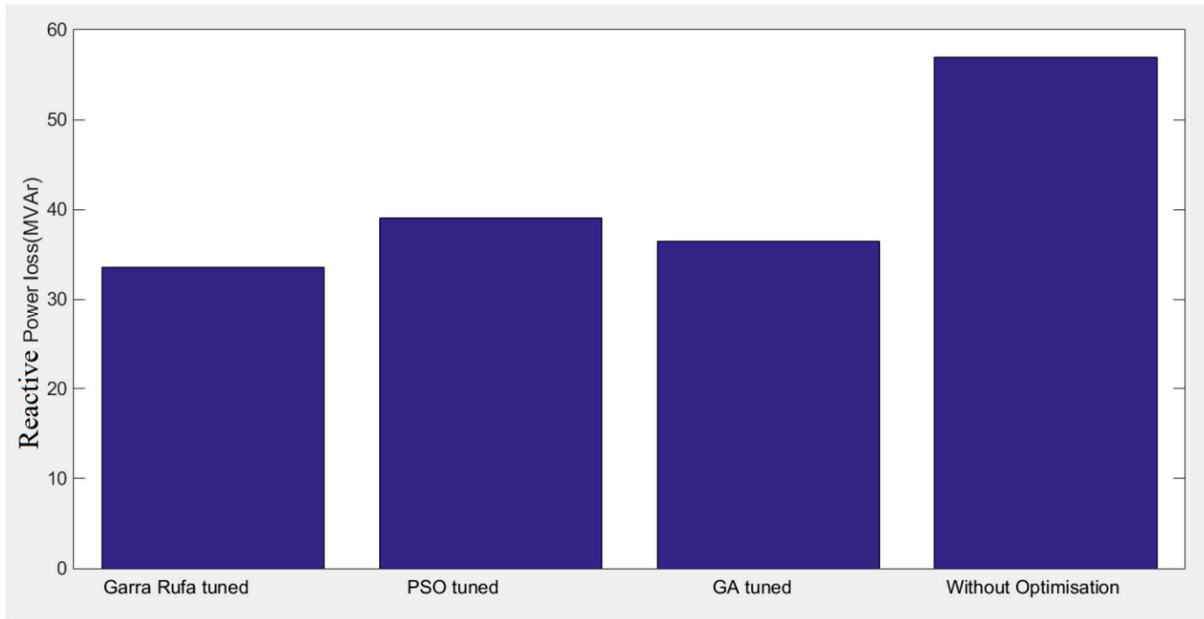

**Figure S23. Reactive Power Losses 4DG and 14-bus**

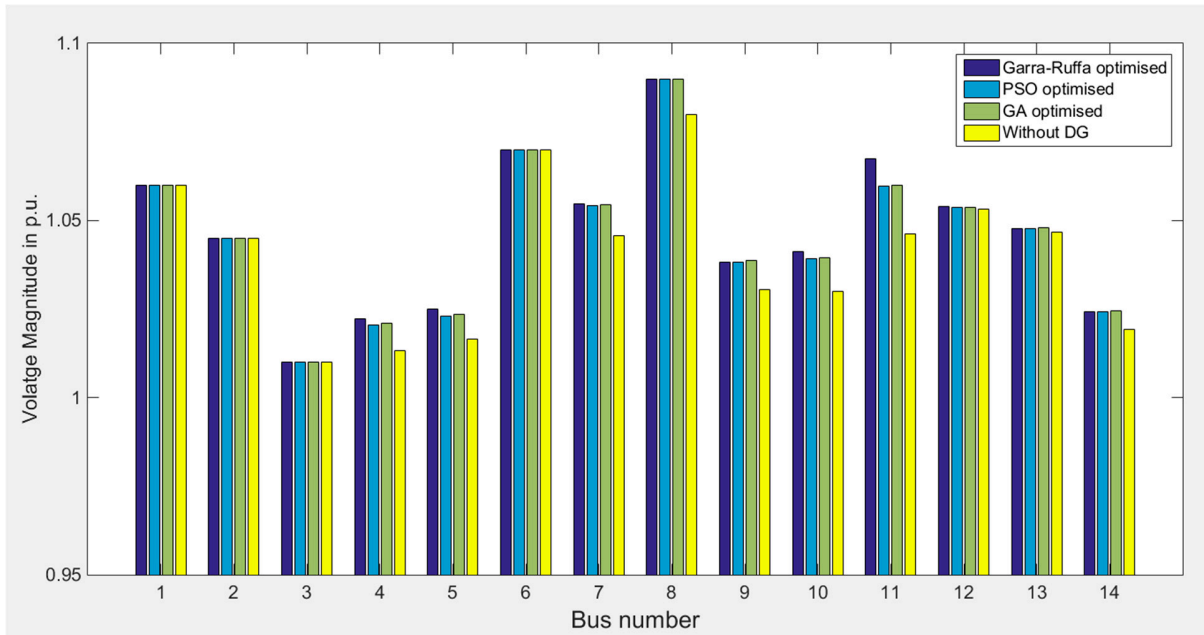

**Figure S24. Voltage Profile 4DG and 14-bus**



**Table S13. load flow results GA, 14-bus, and 5 DG**

| Delta  | Pi      | qi      | pg      | Qg     | pl      | ql     | PLs   | Qls   | V     |
|--------|---------|---------|---------|--------|---------|--------|-------|-------|-------|
| 0      | 142.665 | 0.471   | 142.665 | 0.471  | 0       | 0      | 1.474 | 4.503 | 1.060 |
| -0.049 | 39.135  | 9.030   | 39.999  | 21.730 | 0.864   | 12.700 | 1.237 | 5.108 | 1.045 |
| -0.151 | -73.371 | -3.979  | 0       | 15.020 | 73.371  | 19     | 1.370 | 5.774 | 1.010 |
| -0.119 | -47.799 | 3.900   | 0       | 0      | 47.800  | -3.900 | 0.962 | 2.920 | 1.021 |
| -0.099 | -7.599  | -1.599  | 0       | 0      | 7.600   | 1.600  | 0.530 | 1.619 | 1.024 |
| -0.156 | -11.200 | 9.483   | 0       | 16.983 | 11.200  | 7.500  | 0.234 | 0.598 | 1.070 |
| -0.143 | 0       | 0       | 0       | 0      | 0       | 0      | 0.274 | 0.865 | 1.055 |
| -0.143 | 0       | 21.576  | 0       | 21.576 | 0       | 0      | 0     | 0.878 | 1.090 |
| -0.156 | -29.500 | -16.600 | 0       | 0      | 29.500  | 16.600 | 0     | 0.337 | 1.039 |
| -0.141 | 11.812  | -5.799  | 0       | 0      | -11.812 | 5.800  | 0     | 2.423 | 1.045 |
| -0.133 | 17.254  | -1.799  | 0       | 0      | -17.254 | 1.800  | 0.135 | 0.282 | 1.062 |
| -0.171 | -6.099  | -1.600  | 0       | 0      | 6.100   | 1.600  | 0.074 | 0.155 | 1.053 |
| -0.171 | -13.499 | -5.799  | 0       | 0      | 13.500  | 5.800  | 0.222 | 0.438 | 1.048 |
| -0.180 | -14.899 | -4.999  | 0       | 0      | 14.900  | 5      | 0     | 0.690 | 1.024 |
|        |         |         |         |        |         |        | 0     | 0.392 |       |
|        |         |         |         |        |         |        | 0.109 | 0.289 |       |
|        |         |         |         |        |         |        | 0.118 | 0.252 |       |
|        |         |         |         |        |         |        | 0.071 | 0.168 |       |
|        |         |         |         |        |         |        | 0.008 | 0.007 |       |
|        |         |         |         |        |         |        | 0.071 | 0.144 |       |

**Table S14. load flow results PSO, 14-bus, and 5 DG**

| Delta  | Pi      | qi      | pg      | Qg     | pl      | ql     | PLs   | Qls   | V     |
|--------|---------|---------|---------|--------|---------|--------|-------|-------|-------|
| 0      | 158.089 | -1.958  | 158.089 | -1.958 | 0       | 0      | 1.808 | 5.520 | 1.060 |
| -0.055 | 39.150  | 12.886  | 40.000  | 25.586 | 0.849   | 12.700 | 1.523 | 6.288 | 1.045 |
| -0.160 | -73.350 | -2.933  | 0       | 16.066 | 73.350  | 19     | 1.464 | 6.168 | 1.010 |
| -0.131 | -47.799 | 3.900   | 0       | 0      | 47.800  | -3.900 | 1.149 | 3.487 | 1.019 |
| -0.111 | -7.600  | -1.600  | 0       | 0      | 7.600   | 1.600  | 0.658 | 2.010 | 1.022 |
| -0.184 | -11.199 | 11.125  | 0       | 18.625 | 11.200  | 7.500  | 0.191 | 0.487 | 1.070 |
| -0.164 | 0       | 0       | 0       | 0      | 0       | 0      | 0.292 | 0.922 | 1.054 |
| -0.164 | 0       | 22.171  | 0       | 22.171 | 0       | 0      | 0     | 1.170 | 1.090 |
| -0.181 | -29.500 | -16.599 | 0       | 0      | 29.500  | 16.600 | 0     | 0.568 | 1.038 |
| -0.172 | 11.211  | -5.799  | 0       | 0      | -11.211 | 5.800  | 0     | 3.491 | 1.042 |
| -0.174 | 3.225   | -1.799  | 0       | 0      | -3.225  | 1.800  | 0.061 | 0.129 | 1.055 |
| -0.198 | -6.099  | -1.599  | 0       | 0      | 6.100   | 1.600  | 0.074 | 0.154 | 1.053 |
| -0.198 | -13.500 | -5.800  | 0       | 0      | 13.500  | 5.800  | 0.220 | 0.433 | 1.047 |
| -0.207 | -14.899 | -4.999  | 0       | 0      | 14.900  | 5      | 0     | 0.728 | 1.024 |
|        |         |         |         |        |         |        | 0     | 0.522 |       |

|  |  |  |  |  |  |  |       |       |  |
|--|--|--|--|--|--|--|-------|-------|--|
|  |  |  |  |  |  |  | 0.046 | 0.123 |  |
|  |  |  |  |  |  |  | 0.124 | 0.265 |  |
|  |  |  |  |  |  |  | 0.032 | 0.076 |  |
|  |  |  |  |  |  |  | 0.008 | 0.007 |  |
|  |  |  |  |  |  |  | 0.070 | 0.143 |  |

**Table S15. load flow results GRO, 14-bus, and 5 DG**

| Delta  | Pi      | qi      | pg      | Qg     | pl      | ql     | PLs   | Qls   | V     |
|--------|---------|---------|---------|--------|---------|--------|-------|-------|-------|
| 0      | 125.926 | 4.823   | 125.926 | 4.823  | 0       | 0      | 1.086 | 3.318 | 1.060 |
| -0.041 | 40.464  | 6.443   | 39.999  | 19.143 | -0.464  | 12.700 | 1.074 | 4.436 | 1.045 |
| -0.123 | -55.113 | -10.630 | 0       | 8.369  | 55.113  | 19     | 0.944 | 3.980 | 1.010 |
| -0.108 | -47.799 | 3.900   | 0       | 0      | 47.800  | -3.900 | 0.899 | 2.727 | 1.020 |
| -0.091 | -7.600  | -1.600  | 0       | 0      | 7.600   | 1.600  | 0.531 | 1.621 | 1.023 |
| -0.154 | -11.199 | 10.193  | 0       | 17.693 | 11.200  | 7.500  | 0.071 | 0.181 | 1.070 |
| -0.135 | 0       | 0       | 0       | 0      | 0       | 0      | 0.206 | 0.652 | 1.055 |
| -0.135 | 0       | 21.493  | 0       | 21.493 | 0       | 0      | 0     | 0.947 | 1.090 |
| -0.149 | -29.500 | -16.600 | 0       | 0      | 29.500  | 16.600 | 0     | 0.388 | 1.039 |
| -0.134 | 16.309  | -5.800  | 0       | 0      | -16.309 | 5.800  | 0     | 2.743 | 1.046 |
| -0.136 | 8.551   | -1.800  | 0       | 0      | -8.551  | 1.800  | 0.095 | 0.199 | 1.059 |
| -0.168 | -6.099  | -1.599  | 0       | 0      | 6.100   | 1.600  | 0.073 | 0.152 | 1.053 |
| -0.168 | -13.499 | -5.800  | 0       | 0      | 13.500  | 5.800  | 0.213 | 0.420 | 1.048 |
| -0.175 | -14.900 | -5      | 0       | 0      | 14.900  | 5      | 0     | 0.684 | 1.025 |
|        |         |         |         |        |         |        | 0     | 0.408 |       |
|        |         |         |         |        |         |        | 0.098 | 0.261 |       |
|        |         |         |         |        |         |        | 0.134 | 0.285 |       |
|        |         |         |         |        |         |        | 0.035 | 0.083 |       |
|        |         |         |         |        |         |        | 0.008 | 0.007 |       |
|        |         |         |         |        |         |        | 0.064 | 0.132 |       |

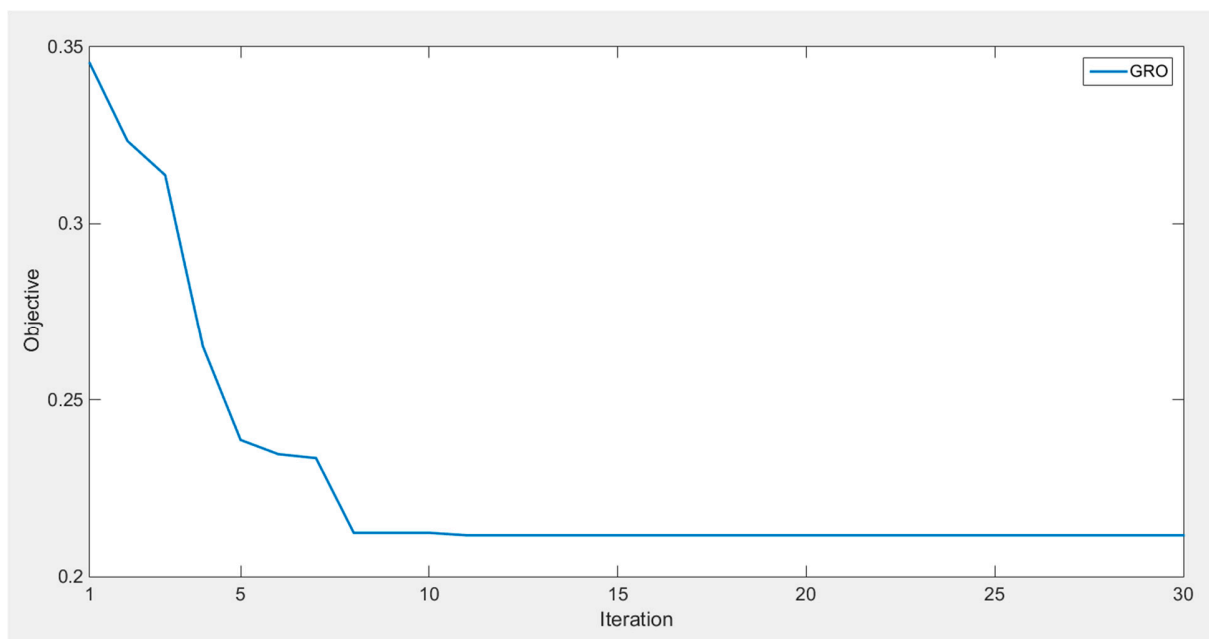

**Figure S25. Algorithm Convergent GRO, 14-bus, and 5DG**

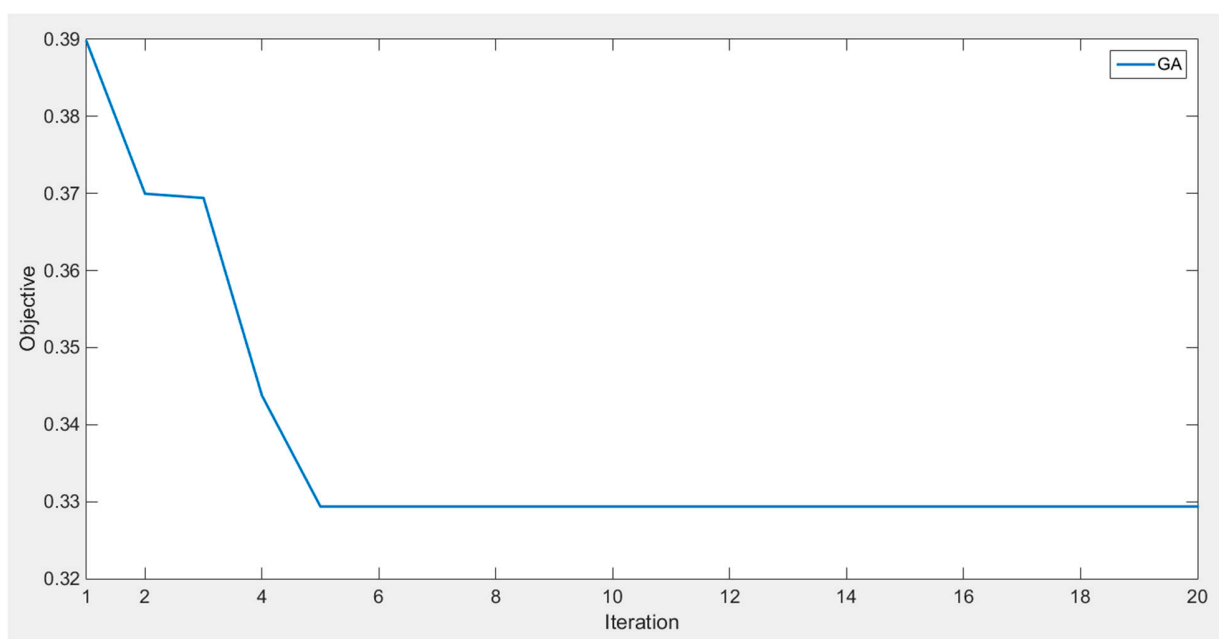

**Figure S26. Algorithm Convergent GA, 14-bus, and 5DG**

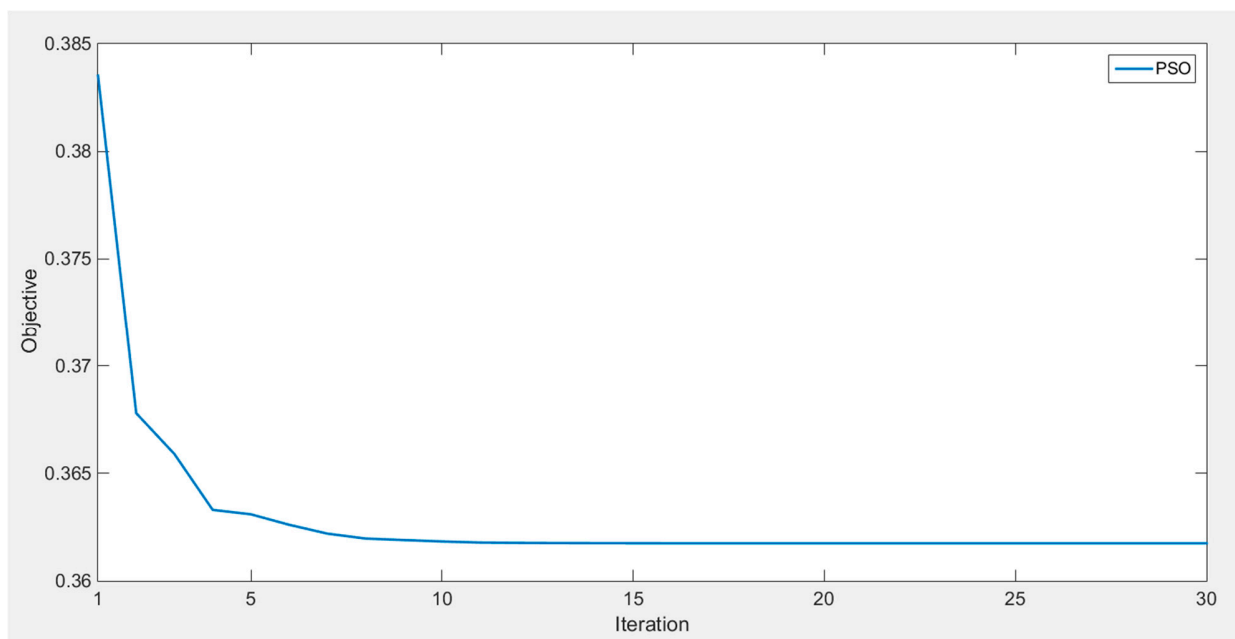

**Figure S27. Algorithm Convergent PSO, 14-bus, and 5DG**

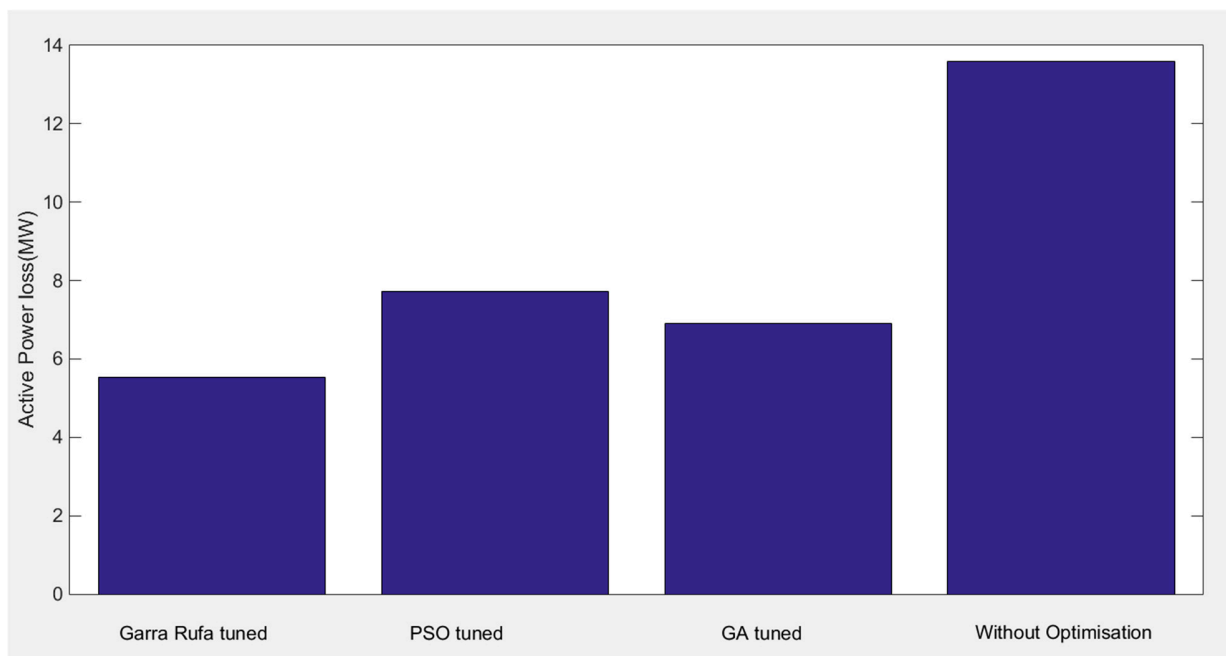

**Figure S28. Active Power Losses 5DG and 14-bus**

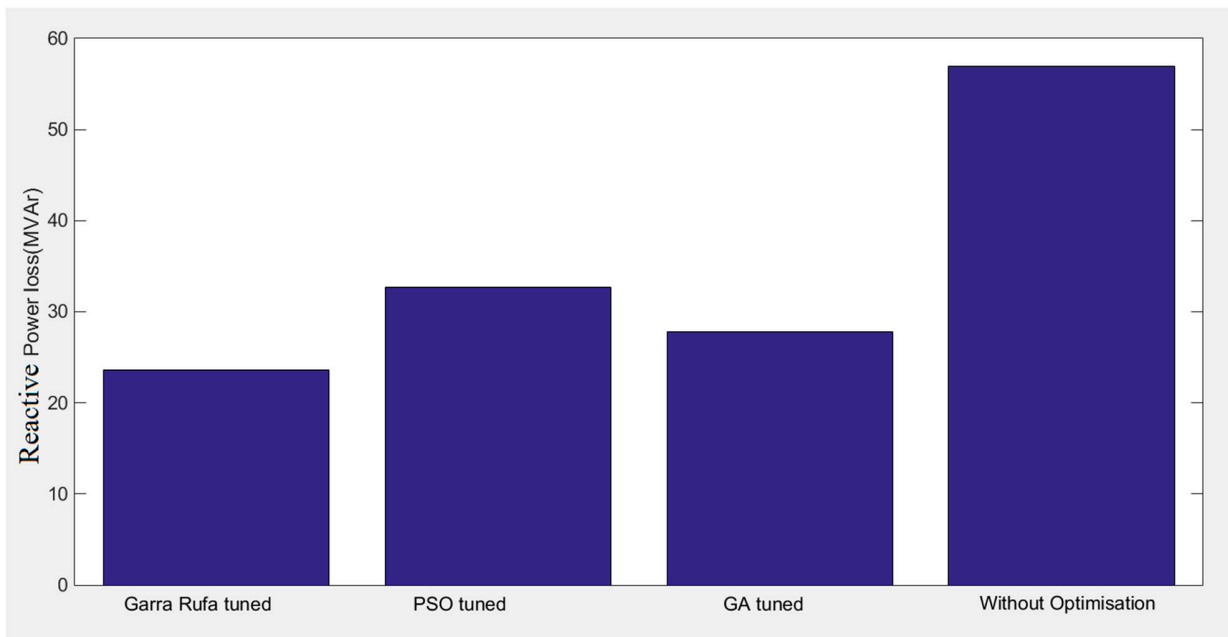

**Figure S29. Reactive Power Losses 5DG and 14-bus**

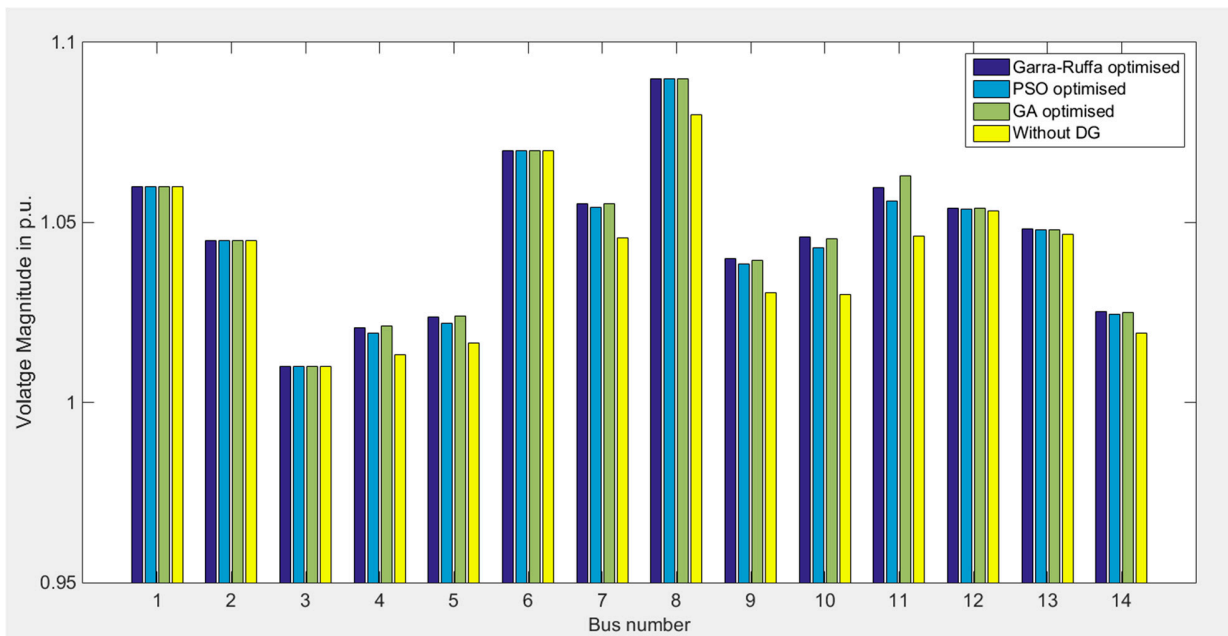

**Figure S30. Voltage Profile 5DG and 14-bus**

**Table S16. load flow results without DG, 14-bus**

| Delta  | Pi      | qi      | Pg      | Qg      | pl     | ql     | PLs   | Qls    | V     |
|--------|---------|---------|---------|---------|--------|--------|-------|--------|-------|
| 0      | 232.592 | -15.233 | 232.592 | -15.233 | 0      | 0      | 4.308 | 13.154 | 1.060 |
| -0.087 | 18.300  | 35.227  | 40.000  | 47.927  | 21.700 | 12.700 | 2.772 | 11.445 | 1.045 |
| -0.222 | -94.200 | 8.758   | 0       | 27.758  | 94.200 | 19     | 2.333 | 9.829  | 1.010 |
| -0.178 | -47.799 | 3.899   | 0       | 0       | 47.800 | -3.900 | 1.669 | 5.067  | 1.013 |
| -0.152 | -7.600  | -1.599  | 0       | 0       | 7.600  | 1.6000 | 0.919 | 2.808  | 1.016 |
| -0.252 | -11.200 | 15.526  | 0       | 23.026  | 11.200 | 7.500  | 0.391 | 0.998  | 1.070 |
| -0.231 | 0       | 0       | 0       | 0       | 0      | 0      | 0.479 | 1.511  | 1.045 |
| -0.231 | 0       | 21.030  | 0       | 21.030  | 0      | 0      | 0     | 1.931  | 1.080 |
| -0.258 | -29.500 | -16.600 | 0       | 0       | 29.500 | 16.600 | 0     | 1.292  | 1.030 |
| -0.262 | -9.000  | -5.799  | 0       | 0       | 9      | 5.800  | 0     | 5.773  | 1.029 |
| -0.259 | -3.499  | -1.799  | 0       | 0       | 3.500  | 1.800  | 0.122 | 0.256  | 1.046 |
| -0.266 | -6.100  | -1.599  | 0       | 0       | 6.100  | 1.600  | 0.080 | 0.167  | 1.053 |
| -0.267 | -13.499 | -5.799  | 0       | 0       | 13.500 | 5.800  | 0.251 | 0.495  | 1.046 |
| -0.280 | -14.900 | -5      | 0       | 0       | 14.900 | 5      | 0     | 0.667  | 1.019 |
|        |         |         |         |         |        |        | 0     | 0.957  |       |
|        |         |         |         |         |        |        | 0.006 | 0.016  |       |
|        |         |         |         |         |        |        | 0.089 | 0.190  |       |
|        |         |         |         |         |        |        | 0.051 | 0.120  |       |
|        |         |         |         |         |        |        | 0.011 | 0.009  |       |
|        |         |         |         |         |        |        | 0.105 | 0.214  |       |

**Test Case 2: IEEE-30 Bus Standard****Table S17. load flow results GA, 30-bus, and 1 DG**

| Delta  | Pi      | Qi      | Pg      | Qg     | pl      | ql     | PLs   | Qls    | V     |
|--------|---------|---------|---------|--------|---------|--------|-------|--------|-------|
| 0      | 187.301 | -0.350  | 187.301 | -0.350 | 0       | 0      | 2.139 | 6.407  | 1.060 |
| -0.058 | 88.376  | 7.748   | 39.999  | 20.448 | -48.376 | 12.700 | 2.312 | 8.452  | 1.043 |
| -0.112 | -2.400  | -1.199  | 0       | 0      | 2.400   | 1.200  | 1.279 | 3.897  | 1.022 |
| -0.137 | -7.599  | -1.599  | 0       | 0      | 7.600   | 1.600  | 0.631 | 1.813  | 1.013 |
| -0.216 | -94.199 | 16.907  | 0       | 35.907 | 94.200  | 19     | 3.082 | 12.949 | 1.010 |
| -0.166 | 0       | 0       | 0       | 0      | 0       | 0      | 2.230 | 6.768  | 1.012 |
| -0.196 | -22.800 | -10.900 | 0       | 0      | 22.800  | 10.900 | 0.543 | 1.890  | 1.003 |
| -0.179 | -29.999 | 0.433   | 0       | 30.433 | 30      | 30     | 0.131 | 0.332  | 1.010 |
| -0.220 | 0       | 0       | 0       | 0      | 0       | 0      | 0.344 | 1.058  | 1.050 |
| -0.248 | -5.799  | 17.000  | 0       | 19.000 | 5.800   | 2      | 0.102 | 0.360  | 1.043 |
| -0.220 | 0       | 16.212  | 0       | 16.212 | 0       | 0      | 0     | 2.238  | 1.082 |
| -0.235 | -11.199 | -7.500  | 0       | 0      | 11.200  | 7.500  | 0     | 1.497  | 1.057 |
| -0.235 | 0       | 10.170  | 0       | 10.170 | 0       | 0      | 0     | 0.466  | 1.071 |
| -0.250 | -6.200  | -1.600  | 0       | 0      | 6.200   | 1.600  | 0     | 0.831  | 1.042 |

|        |         |         |   |       |        |        |        |        |       |
|--------|---------|---------|---|-------|--------|--------|--------|--------|-------|
| -0.251 | -8.200  | -2.499  | 0 | 0     | 8.200  | 2.500  | 0      | 5.087  | 1.038 |
| -0.245 | -3.500  | -1.799  | 0 | 0     | 3.500  | 1.800  | 0      | 0.126  | 1.044 |
| -0.251 | -9.000  | -5.799  | 0 | 0     | 9      | 5.800  | 0.072  | 0.150  | 1.038 |
| -0.262 | -3.200  | -0.900  | 0 | 0     | 3.200  | 0.900  | 0.206  | 0.407  | 1.028 |
| -0.265 | -9.500  | -3.400  | 0 | 0     | 9.500  | 3.400  | 0.055  | 0.117  | 1.025 |
| -0.262 | -2.200  | -0.699  | 0 | 0     | 2.200  | 0.700  | 0.005  | 0.004  | 1.029 |
| -0.257 | -17.50  | -11.200 | 0 | 0     | 17.500 | 11.200 | 0.012  | 0.029  | 1.029 |
| -0.254 | 0       | 0       | 0 | 0     | 0      | 0      | 0.041  | 0.085  | 1.035 |
| -0.257 | -3.200  | -1.600  | 0 | 0     | 3.200  | 1.600  | 0.005  | 0.011  | 1.029 |
| -0.260 | -8.700  | -2.400  | 0 | 4.299 | 8.700  | 6.700  | 0.015  | 0.031  | 1.023 |
| -0.253 | 0       | 0       | 0 | 0     | 0      | 0      | 0.077  | 0.172  | 1.020 |
| -0.260 | -3.500  | -2.300  | 0 | 0     | 3.500  | 2.300  | 0.013  | 0.035  | 1.002 |
| -0.244 | 0       | 0       | 0 | 0     | 0      | 0      | 0.152  | 0.327  | 1.026 |
| -0.178 | 0       | 0       | 0 | 0     | 0      | 0      | 0.028  | 0.059  | 1.010 |
| -0.266 | -2.400  | -0.899  | 0 | 0     | 2.400  | 0.900  | 0      | 0.0001 | 1.006 |
| -0.281 | -10.600 | -1.899  | 0 | 0     | 10.600 | 1.900  | 0.023  | 0.047  | 0.995 |
|        |         |         |   |       |        |        | 0.045  | 0.070  |       |
|        |         |         |   |       |        |        | 0.005  | 0.012  |       |
|        |         |         |   |       |        |        | 0.008  | 0.014  |       |
|        |         |         |   |       |        |        | 0.044  | 0.066  |       |
|        |         |         |   |       |        |        | 0.024  | 0.046  |       |
|        |         |         |   |       |        |        | 0      | 1.270  |       |
|        |         |         |   |       |        |        | 0.085  | 0.161  |       |
|        |         |         |   |       |        |        | 0.161  | 0.303  |       |
|        |         |         |   |       |        |        | 0.033  | 0.062  |       |
|        |         |         |   |       |        |        | 0.0002 | 0.0008 |       |
|        |         |         |   |       |        |        | 0.059  | 0.210  |       |

**Table S18. load flow results PSO, 30-bus, and 1 DG**

| Delta  | Pi      | Qi      | Pg      | Qg     | Pl      | Ql     | PLs   | Qls    | V     |
|--------|---------|---------|---------|--------|---------|--------|-------|--------|-------|
| 0      | 196.686 | -2.635  | 196.686 | -2.635 | 0       | 0      | 2.451 | 7.340  | 1.060 |
| -0.063 | 79.354  | 11.120  | 39.999  | 23.820 | -39.354 | 12.700 | 2.408 | 8.801  | 1.043 |
| -0.114 | -2.400  | -1.199  | 0       | 0      | 2.400   | 1.200  | 1.242 | 3.786  | 1.022 |
| -0.140 | -7.599  | -1.599  | 0       | 0      | 7.600   | 1.600  | 0.658 | 1.890  | 1.013 |
| -0.220 | -94.200 | 16.911  | 0       | 35.911 | 94.200  | 19     | 3.064 | 12.874 | 1.010 |
| -0.170 | 0       | 0       | 0       | 0      | 0       | 0      | 2.192 | 6.653  | 1.012 |
| -0.199 | -22.800 | -10.900 | 0       | 0      | 22.800  | 10.900 | 0.555 | 1.932  | 1.003 |
| -0.182 | -29.999 | 0.456   | 0       | 30.456 | 30      | 30     | 0.135 | 0.342  | 1.010 |
| -0.223 | 0       | 0       | 0       | 0      | 0       | 0      | 0.349 | 1.072  | 1.050 |
| -0.251 | -5.799  | 17.000  | 0       | 19.000 | 5.800   | 2      | 0.102 | 0.360  | 1.043 |
| -0.223 | 0       | 16.218  | 0       | 16.218 | 0       | 0      | 0     | 2.235  | 1.082 |
| -0.238 | -11.199 | -7.499  | 0       | 0      | 11.200  | 7.500  | 0     | 1.494  | 1.057 |

|        |         |         |   |        |        |        |        |        |       |
|--------|---------|---------|---|--------|--------|--------|--------|--------|-------|
| -0.238 | 0       | 10.178  | 0 | 10.178 | 0      | 0      | 0      | 0.467  | 1.071 |
| -0.253 | -6.200  | -1.599  | 0 | 0      | 6.200  | 1.600  | 0      | 0.829  | 1.042 |
| -0.255 | -8.199  | -2.500  | 0 | 0      | 8.200  | 2.500  | 0      | 5.099  | 1.038 |
| -0.248 | -3.500  | -1.799  | 0 | 0      | 3.500  | 1.800  | 0      | 0.126  | 1.044 |
| -0.254 | -9.000  | -5.799  | 0 | 0      | 9      | 5.800  | 0.072  | 0.150  | 1.038 |
| -0.266 | -3.200  | -0.900  | 0 | 0      | 3.200  | 0.900  | 0.207  | 0.408  | 1.028 |
| -0.269 | -9.500  | -3.400  | 0 | 0      | 9.500  | 3.400  | 0.056  | 0.117  | 1.025 |
| -0.265 | -2.199  | -0.700  | 0 | 0      | 2.200  | 0.700  | 0.005  | 0.004  | 1.029 |
| -0.260 | -17.500 | -11.200 | 0 | 0      | 17.500 | 11.200 | 0.012  | 0.029  | 1.029 |
| -0.257 | 0       | 0       | 0 | 0      | 0      | 0      | 0.041  | 0.085  | 1.035 |
| -0.260 | -3.200  | -1.600  | 0 | 0      | 3.200  | 1.600  | 0.005  | 0.011  | 1.029 |
| -0.263 | -8.699  | -2.399  | 0 | 4.300  | 8.700  | 6.700  | 0.015  | 0.031  | 1.023 |
| -0.257 | 0       | 0       | 0 | 0      | 0      | 0      | 0.076  | 0.171  | 1.020 |
| -0.264 | -3.500  | -2.300  | 0 | 0      | 3.500  | 2.300  | 0.013  | 0.035  | 1.002 |
| -0.248 | 0       | 0       | 0 | 0      | 0      | 0      | 0.151  | 0.327  | 1.026 |
| -0.181 | 0       | 0       | 0 | 0      | 0      | 0      | 0.028  | 0.059  | 1.010 |
| -0.269 | -2.400  | -0.899  | 0 | 0      | 2.400  | 0.900  | 0      | 0.0001 | 1.006 |
| -0.284 | -10.600 | -1.899  | 0 | 0      | 10.600 | 1.900  | 0.023  | 0.047  | 0.995 |
|        |         |         |   |        |        |        | 0.045  | 0.070  |       |
|        |         |         |   |        |        |        | 0.005  | 0.012  |       |
|        |         |         |   |        |        |        | 0.008  | 0.014  |       |
|        |         |         |   |        |        |        | 0.044  | 0.066  |       |
|        |         |         |   |        |        |        | 0.024  | 0.045  |       |
|        |         |         |   |        |        |        | 0      | 1.269  |       |
|        |         |         |   |        |        |        | 0.085  | 0.161  |       |
|        |         |         |   |        |        |        | 0.161  | 0.303  |       |
|        |         |         |   |        |        |        | 0.033  | 0.062  |       |
|        |         |         |   |        |        |        | 0.0002 | 0.0008 |       |
|        |         |         |   |        |        |        | 0.059  | 0.210  |       |

**Table S19. load flow results GRO, 30-bus, and 1 DG**

| Delta  | Pi      | Qi      | Pg      | Qg     | Pl      | Ql     | PLs   | QLs    | V     |
|--------|---------|---------|---------|--------|---------|--------|-------|--------|-------|
| 0      | 213.830 | -6.696  | 213.830 | -6.696 | 0       | 0      | 3.078 | 9.217  | 1.060 |
| -0.071 | 62.941  | 17.362  | 39.999  | 30.062 | -22.941 | 12.700 | 2.587 | 9.457  | 1.043 |
| -0.119 | -2.400  | -1.199  | 0       | 0      | 2.400   | 1.200  | 1.177 | 3.588  | 1.022 |
| -0.146 | -7.599  | -1.599  | 0       | 0      | 7.600   | 1.600  | 0.708 | 2.035  | 1.013 |
| -0.227 | -94.200 | 16.922  | 0       | 35.922 | 94.200  | 19     | 3.032 | 12.738 | 1.010 |
| -0.176 | 0       | 0       | 0       | 0      | 0       | 0      | 2.125 | 6.448  | 1.012 |
| -0.206 | -22.800 | -10.899 | 0       | 0      | 22.800  | 10.900 | 0.577 | 2.010  | 1.003 |
| -0.188 | -29.999 | 0.505   | 0       | 30.505 | 30      | 30     | 0.142 | 0.359  | 1.010 |
| -0.229 | 0       | 0       | 0       | 0      | 0       | 0      | 0.357 | 1.098  | 1.050 |
| -0.257 | -5.799  | 17.000  | 0       | 19.000 | 5.800   | 2      | 0.103 | 0.360  | 1.043 |



|        |         |         |   |        |        |        |        |        |       |
|--------|---------|---------|---|--------|--------|--------|--------|--------|-------|
| -0.229 | 0       | 16.230  | 0 | 16.230 | 0      | 0      | 0      | 2.229  | 1.082 |
| -0.244 | -11.199 | -7.500  | 0 | 0      | 11.200 | 7.500  | 0      | 1.489  | 1.057 |
| -0.244 | 0       | 10.193  | 0 | 10.193 | 0      | 0      | 0      | 0.468  | 1.071 |
| -0.259 | -6.200  | -1.599  | 0 | 0      | 6.200  | 1.600  | 0      | 0.826  | 1.042 |
| -0.261 | -8.200  | -2.499  | 0 | 0      | 8.200  | 2.500  | -0     | 5.123  | 1.038 |
| -0.254 | -3.500  | -1.799  | 0 | 0      | 3.500  | 1.800  | 0      | 0.126  | 1.044 |
| -0.260 | -8.999  | -5.799  | 0 | 0      | 9      | 5.800  | 0.072  | 0.150  | 1.038 |
| -0.272 | -3.200  | -0.899  | 0 | 0      | 3.200  | 0.900  | 0.208  | 0.410  | 1.028 |
| -0.275 | -9.500  | -3.400  | 0 | 0      | 9.500  | 3.400  | 0.056  | 0.118  | 1.025 |
| -0.271 | -2.199  | -0.699  | 0 | 0      | 2.200  | 0.700  | 0.005  | 0.004  | 1.029 |
| -0.266 | -17.500 | -11.199 | 0 | 0      | 17.500 | 11.200 | 0.012  | 0.030  | 1.029 |
| -0.263 | 0       | 0       | 0 | 0      | 0      | 0      | 0.042  | 0.085  | 1.035 |
| -0.266 | -3.199  | -1.599  | 0 | 0      | 3.200  | 1.600  | 0.005  | 0.011  | 1.029 |
| -0.270 | -8.700  | -2.400  | 0 | 4.299  | 8.700  | 6.700  | 0.015  | 0.031  | 1.023 |
| -0.263 | 0       | 0       | 0 | 0      | 0      | 0      | 0.076  | 0.171  | 1.020 |
| -0.270 | -3.500  | -2.300  | 0 | 0      | 3.500  | 2.300  | 0.013  | 0.035  | 1.002 |
| -0.254 | 0       | 0       | 0 | 0      | 0      | 0      | 0.151  | 0.326  | 1.026 |
| -0.187 | 0       | 0       | 0 | 0      | 0      | 0      | 0.028  | 0.059  | 1.010 |
| -0.275 | -2.400  | -0.899  | 0 | 0      | 2.400  | 0.900  | 0      | 0.0001 | 1.006 |
| -0.291 | -10.600 | -1.899  | 0 | 0      | 10.600 | 1.900  | 0.023  | 0.048  | 0.995 |
|        |         |         |   |        |        |        | 0.045  | 0.070  |       |
|        |         |         |   |        |        |        | 0.005  | 0.012  |       |
|        |         |         |   |        |        |        | 0.008  | 0.014  |       |
|        |         |         |   |        |        |        | 0.044  | 0.066  |       |
|        |         |         |   |        |        |        | 0.023  | 0.045  |       |
|        |         |         |   |        |        |        | 0      | 1.267  |       |
|        |         |         |   |        |        |        | 0.085  | 0.161  |       |
|        |         |         |   |        |        |        | 0.161  | 0.303  |       |
|        |         |         |   |        |        |        | 0.033  | 0.062  |       |
|        |         |         |   |        |        |        | 0.0002 | 0.0008 |       |
|        |         |         |   |        |        |        | 0.059  | 0.210  |       |

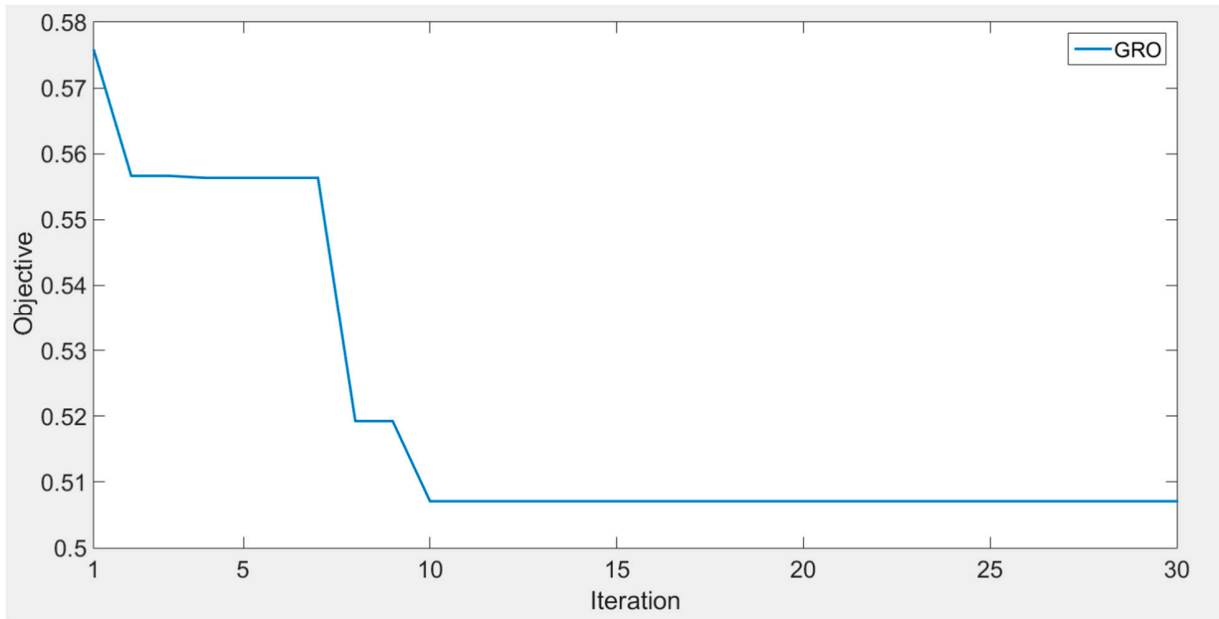

**Figure S31. Algorithm Convergent GRO, 30-bus, and 1DG**

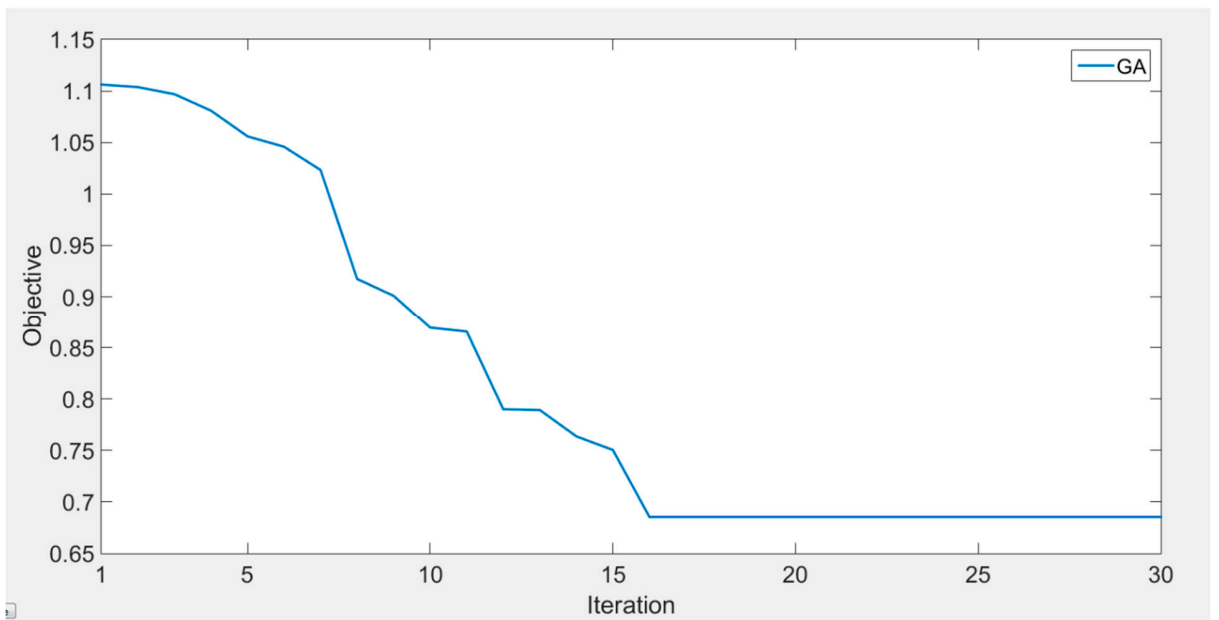

**Figure S32. Algorithm Convergent GA, 30-bus, and 1DG**

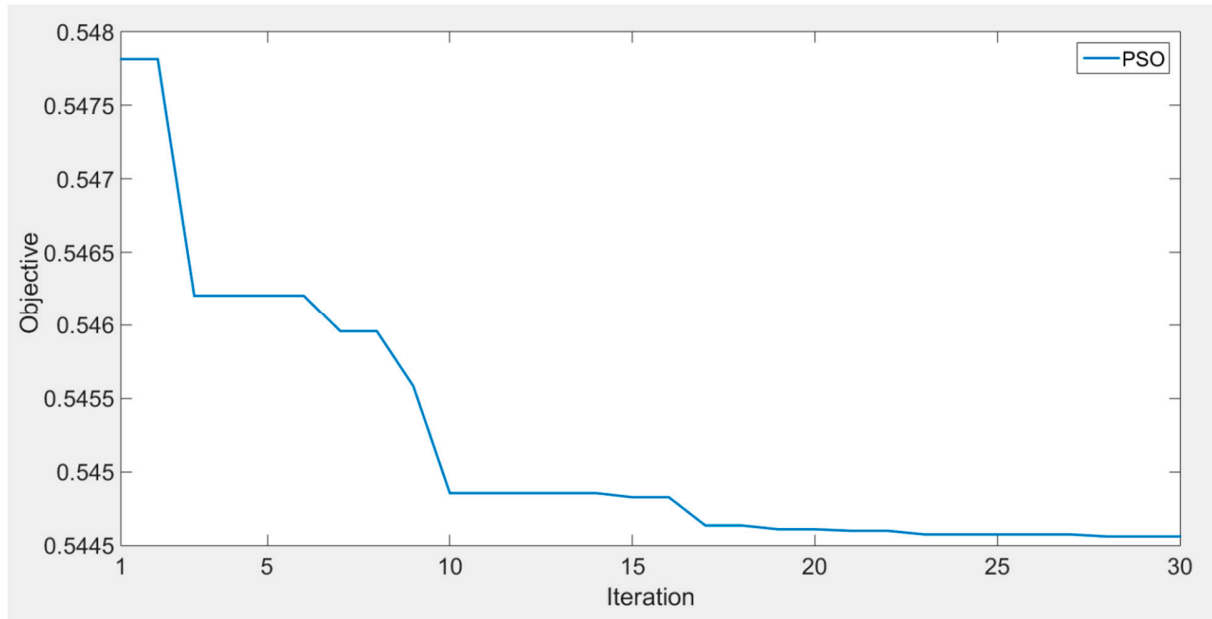

**Figure S33. Algorithm Convergent PSO, 30-bus, and 1DG**

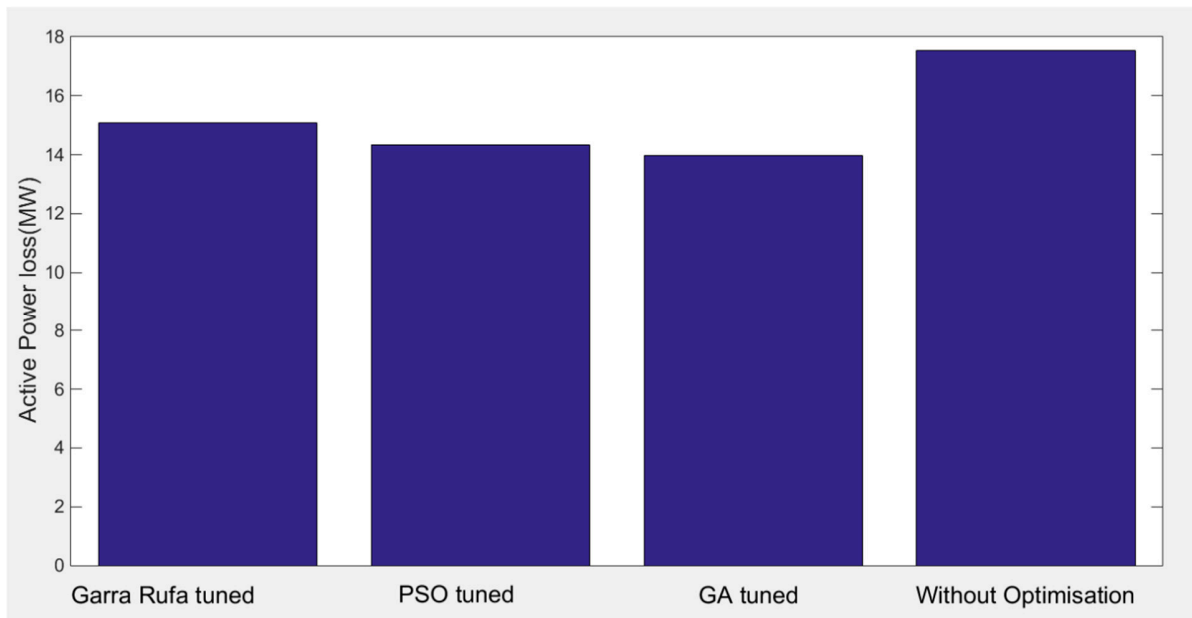

**Figure S34. Active Power Losses 1DG and 30-bus**

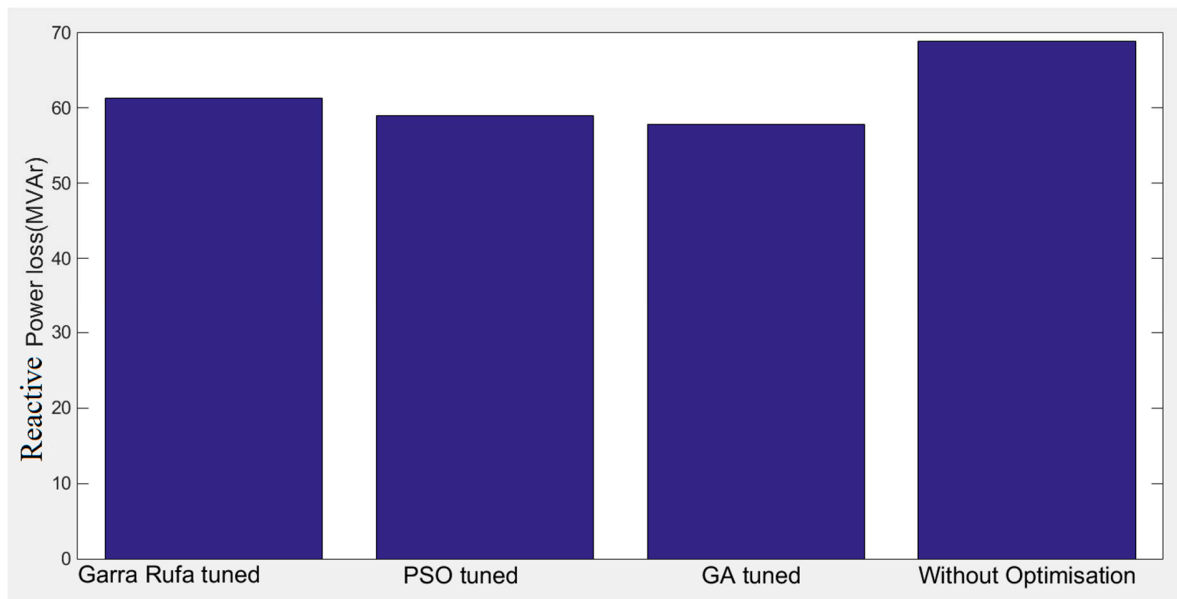

**Figure S35. Reactive Power Losses 1DG and 30-bus**

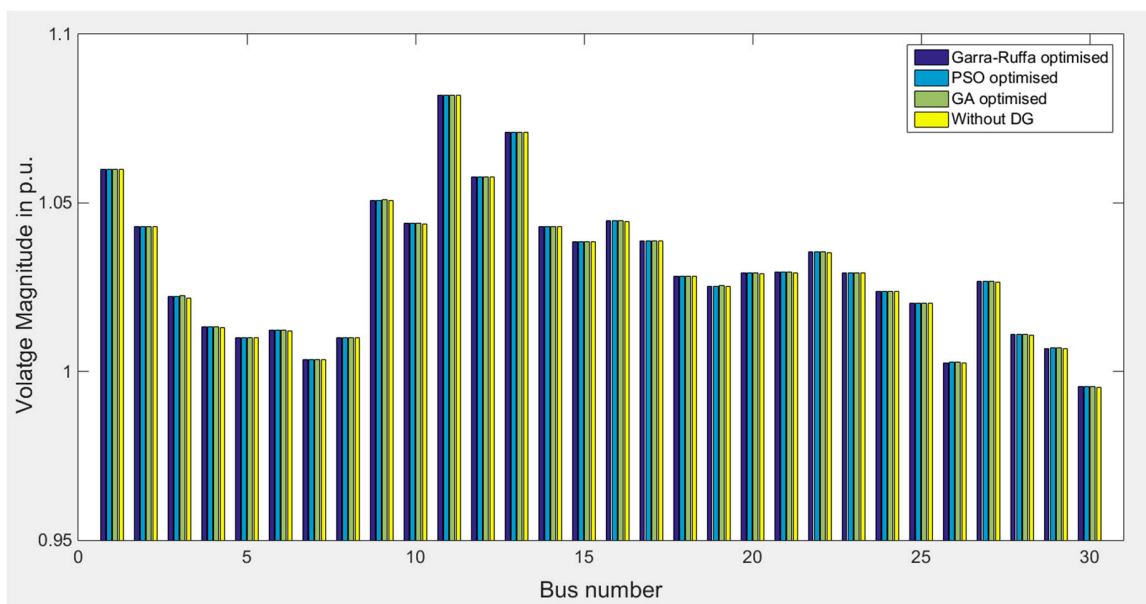

**Figure S36. Voltage Profile 1DG and 30-bus**

**Table S20. load flow results GA, 30-bus, and 2 DG**

| Delta  | Pi      | qi      | Pg      | Qg     | PI      | QI     | PLs   | QIs   | V     |
|--------|---------|---------|---------|--------|---------|--------|-------|-------|-------|
| 0      | 161.977 | -0.984  | 161.977 | -0.984 | 0       | 0      | 2.118 | 6.343 | 1.060 |
| -0.058 | 18.300  | 14.023  | 40.000  | 26.723 | 21.700  | 12.700 | 1.051 | 3.842 | 1.043 |
| -0.073 | -2.400  | -1.199  | 0       | 0      | 2.400   | 1.200  | 0.253 | 0.772 | 1.030 |
| -0.090 | -7.600  | -1.599  | 0       | 0      | 7.600   | 1.600  | 0.279 | 0.802 | 1.023 |
| -0.189 | -94.199 | 14.071  | 0       | 33.071 | 94.200  | 19     | 2.187 | 9.190 | 1.010 |
| -0.114 | 0       | 0       | 0       | 0      | 0       | 0      | 0.674 | 2.047 | 1.018 |
| -0.154 | -22.800 | -10.90  | 0       | 0      | 22.800  | 10.900 | 0.418 | 1.456 | 1.007 |
| -0.124 | -29.999 | -16.764 | 0       | 13.235 | 30      | 30     | 0.372 | 0.939 | 1.010 |
| -0.119 | 0       | 0       | 0       | 0      | 0       | 0      | 0.627 | 1.928 | 1.054 |
| -0.121 | -5.800  | 17.000  | 0       | 19.000 | 5.800   | 2      | 0.108 | 0.381 | 1.046 |
| -0.119 | 0       | 14.498  | 0       | 14.498 | 0       | 0      | 0     | 0.642 | 1.082 |
| -0.090 | -11.200 | -7.499  | 0       | 0      | 11.200  | 7.500  | 0     | 0.154 | 1.064 |
| -0.090 | 0       | 5.090   | 0       | 5.090  | 0       | 0      | 0     | 0.373 | 1.071 |
| -0.049 | 33.975  | -1.600  | 0       | 0      | -33.975 | 1.600  | 0     | 0.062 | 1.085 |
| -0.080 | -8.200  | -2.499  | 0       | 0      | 8.200   | 2.500  | 0     | 0.715 | 1.057 |
| -0.108 | -3.500  | -1.799  | 0       | 0      | 3.500   | 1.800  | 0     | 0.031 | 1.049 |
| -0.121 | -9.000  | -5.799  | 0       | 0      | 9       | 5.800  | 0.356 | 0.741 | 1.041 |
| -0.039 | 49.519  | -0.900  | 0       | 0      | -49.519 | 0.900  | 0.050 | 0.100 | 1.073 |
| -0.072 | -9.500  | -3.399  | 0       | 0      | 9.500   | 3.400  | 0.115 | 0.243 | 1.055 |
| -0.085 | -2.200  | -0.699  | 0       | 0      | 2.200   | 0.700  | 0.457 | 0.413 | 1.051 |
| -0.122 | -17.50  | -11.199 | 0       | 0      | 17.500  | 11.200 | 0.046 | 0.108 | 1.034 |
| -0.129 | 0       | 0       | 0       | 0      | 0       | 0      | 0.381 | 0.777 | 1.038 |
| -0.119 | -3.200  | -1.599  | 0       | 0      | 3.200   | 1.600  | 0.477 | 0.966 | 1.035 |
| -0.139 | -8.700  | -2.399  | 0       | 4.300  | 8.700   | 6.700  | 0.118 | 0.236 | 1.026 |
| -0.157 | 0       | 0       | 0       | 0      | 0       | 0      | 0.263 | 0.588 | 1.019 |
| -0.164 | -3.499  | -2.299  | 0       | 0      | 3.500   | 2.300  | 0.008 | 0.021 | 1.001 |
| -0.164 | 0       | 0       | 0       | 0      | 0       | 0      | 0.066 | 0.142 | 1.023 |
| -0.122 | 0       | 0       | 0       | 0      | 0       | 0      | 0.034 | 0.072 | 1.015 |
| -0.186 | -2.399  | -0.899  | 0       | 0      | 2.400   | 0.900  | 0.013 | 0.026 | 1.003 |
| -0.201 | -10.60  | -1.900  | 0       | 0      | 10.600  | 1.900  | 0.433 | 0.875 | 0.992 |
|        |         |         |         |        |         |        | 0.055 | 0.085 |       |
|        |         |         |         |        |         |        | 0.068 | 0.140 |       |
|        |         |         |         |        |         |        | 0.054 | 0.095 |       |
|        |         |         |         |        |         |        | 0.044 | 0.066 |       |
|        |         |         |         |        |         |        | 0.013 | 0.026 |       |
|        |         |         |         |        |         |        | 0     | 0.494 |       |
|        |         |         |         |        |         |        | 0.086 | 0.162 |       |
|        |         |         |         |        |         |        | 0.162 | 0.305 |       |
|        |         |         |         |        |         |        | 0.033 | 0.063 |       |
|        |         |         |         |        |         |        | 0.005 | 0.017 |       |
|        |         |         |         |        |         |        | 0.029 | 0.103 |       |

**Table S21. load flow results PSO, 30-bus, and 2 DG**

| Delta  | Pi      | Qi      | Pg      | Qg     | pl      | Ql     | PLs   | Qls   | V     |
|--------|---------|---------|---------|--------|---------|--------|-------|-------|-------|
| 0      | 143.866 | 2.818   | 143.866 | 2.818  | 0       | 0      | 1.711 | 5.124 | 1.060 |
| -0.051 | 18.299  | 11.264  | 39.999  | 23.964 | 21.700  | 12.700 | 0.794 | 2.904 | 1.043 |
| -0.063 | -2.400  | -1.199  | 0       | 0      | 2.400   | 1.200  | 0.172 | 0.526 | 1.031 |
| -0.076 | -7.600  | -1.599  | 0       | 0      | 7.600   | 1.600  | 0.209 | 0.600 | 1.024 |
| -0.179 | -94.200 | 13.811  | 0       | 32.811 | 94.200  | 19     | 2.062 | 8.663 | 1.010 |
| -0.100 | 0       | 0       | 0       | 0      | 0       | 0      | 0.515 | 1.564 | 1.019 |
| -0.141 | -22.800 | -10.899 | 0       | 0      | 22.800  | 10.900 | 0.385 | 1.340 | 1.007 |
| -0.110 | -29.999 | -18.786 | 0       | 11.213 | 30      | 30     | 0.425 | 1.072 | 1.010 |
| -0.095 | 0       | 0       | 0       | 0      | 0       | 0      | 0.680 | 2.090 | 1.053 |
| -0.093 | -5.800  | 17.000  | 0       | 19.000 | 5.800   | 2      | 0.112 | 0.395 | 1.045 |
| -0.095 | 0       | 14.694  | 0       | 14.694 | 0       | 0      | 0     | 0.603 | 1.082 |
| -0.058 | -11.200 | -7.499  | 0       | 0      | 11.200  | 7.500  | 0     | 0.135 | 1.064 |
| -0.058 | 0       | 5.289   | 0       | 5.289  | 0       | 0      | 0     | 0.383 | 1.071 |
| -0.007 | 41.185  | -1.600  | 0       | 0      | -41.185 | 1.600  | 0     | 0.074 | 1.090 |
| -0.042 | -8.200  | -2.499  | 0       | 0      | 8.200   | 2.500  | 0     | 0.817 | 1.058 |
| -0.077 | -3.500  | -1.799  | 0       | 0      | 3.500   | 1.800  | 0     | 0.034 | 1.048 |
| -0.092 | -9.000  | -5.799  | 0       | 0      | 9       | 5.800  | 0.562 | 1.168 | 1.040 |
| 0.008  | 60.682  | -0.900  | 0       | 0      | -60.682 | 0.900  | 0.093 | 0.183 | 1.079 |
| -0.030 | -9.500  | -3.399  | 0       | 0      | 9.500   | 3.400  | 0.128 | 0.270 | 1.058 |
| -0.046 | -2.200  | -0.699  | 0       | 0      | 2.200   | 0.700  | 0.603 | 0.545 | 1.053 |
| -0.092 | -17.500 | -11.200 | 0       | 0      | 17.500  | 11.200 | 0.054 | 0.126 | 1.034 |
| -0.101 | 0       | 0       | 0       | 0      | 0       | 0      | 0.619 | 1.262 | 1.037 |
| -0.089 | -3.200  | -1.599  | 0       | 0      | 3.200   | 1.600  | 0.663 | 1.341 | 1.035 |
| -0.111 | -8.700  | -2.399  | 0       | 4.300  | 8.700   | 6.700  | 0.188 | 0.376 | 1.025 |
| -0.134 | 0       | 0       | 0       | 0      | 0       | 0      | 0.437 | 0.977 | 1.017 |
| -0.142 | -3.499  | -2.299  | 0       | 0      | 3.500   | 2.300  | 0.008 | 0.021 | 0.999 |
| -0.144 | 0       | 0       | 0       | 0      | 0       | 0      | 0.061 | 0.132 | 1.021 |
| -0.107 | 0       | 0       | 0       | 0      | 0       | 0      | 0.036 | 0.075 | 1.016 |
| -0.166 | -2.400  | -0.899  | 0       | 0      | 2.400   | 0.900  | 0.018 | 0.038 | 1.001 |
| -0.181 | -10.599 | -1.900  | 0       | 0      | 10.600  | 1.900  | 0.572 | 1.155 | 0.990 |
|        |         |         |         |        |         |        | 0.057 | 0.089 |       |
|        |         |         |         |        |         |        | 0.089 | 0.183 |       |
|        |         |         |         |        |         |        | 0.083 | 0.146 |       |
|        |         |         |         |        |         |        | 0.044 | 0.066 |       |
|        |         |         |         |        |         |        | 0.024 | 0.046 |       |
|        |         |         |         |        |         |        | 0     | 0.392 |       |
|        |         |         |         |        |         |        | 0.086 | 0.163 |       |
|        |         |         |         |        |         |        | 0.162 | 0.306 |       |
|        |         |         |         |        |         |        | 0.033 | 0.063 |       |
|        |         |         |         |        |         |        | 0.006 | 0.021 |       |
|        |         |         |         |        |         |        | 0.025 | 0.090 |       |

**Table S22. load flow results GRO, 30-bus, and 2 DG**

| Delta  | Pi      | qi      | Pg      | Qg     | PI      | QI     | PLs   | QIs   | V      |
|--------|---------|---------|---------|--------|---------|--------|-------|-------|--------|
| 0      | 153.912 | 0.627   | 153.912 | 0.627  | 0       | 0      | 1.933 | 5.791 | 1.060  |
| -0.055 | 18.299  | 12.761  | 39.999  | 25.461 | 21.700  | 12.700 | 0.929 | 3.396 | 1.043  |
| -0.068 | -2.400  | -1.199  | 0       | 0      | 2.400   | 1.200  | 0.212 | 0.648 | 1.031  |
| -0.084 | -7.600  | -1.599  | 0       | 0      | 7.600   | 1.600  | 0.245 | 0.706 | 1.023  |
| -0.185 | -94.200 | 13.977  | 0       | 32.977 | 94.200  | 19     | 2.134 | 8.967 | 1.010  |
| -0.108 | 0       | 0       | 0       | 0      | 0       | 0      | 0.605 | 1.836 | 1.018  |
| -0.149 | -22.800 | -10.900 | 0       | 0      | 22.800  | 10.900 | 0.416 | 1.447 | 1.007  |
| -0.118 | -29.999 | -17.509 | 0       | 12.490 | 30      | 30     | 0.394 | 0.994 | 1.010  |
| -0.110 | 0       | 0       | 0       | 0      | 0       | 0      | 0.649 | 1.995 | 1.053  |
| -0.111 | -5.800  | 17.000  | 0       | 19.000 | 5.800   | 2      | 0.110 | 0.386 | 1.045  |
| -0.110 | 0       | 14.755  | 0       | 14.755 | 0       | 0      | 0     | 0.605 | 1.082  |
| -0.073 | -11.200 | -7.499  | 0       | 0      | 11.200  | 7.500  | 0     | 0.131 | 1.064  |
| -0.073 | 0       | 4.767   | 0       | 4.767  | 0       | 0      | 0     | 0.386 | 1.071  |
| -0.020 | 46.389  | -1.600  | 0       | 0      | -46.389 | 1.600  | 0     | 0.067 | 1.094  |
| -0.063 | -8.200  | -2.499  | 0       | 0      | 8.200   | 2.500  | 0     | 0.758 | 1.057  |
| -0.093 | -3.500  | -1.799  | 0       | 0      | 3.500   | 1.800  | 0     | 0.027 | 1.048  |
| -0.109 | -9.000  | -5.799  | 0       | 0      | 9       | 5.800  | 0.636 | 1.322 | 1.040  |
| -0.029 | 45.408  | -0.900  | 0       | 0      | 3.200   | 0.900  | 0.055 | 0.108 | 1.070  |
| -0.062 | -9.500  | -3.399  | 0       | 0      | -39.108 | 3.400  | 0.141 | 0.296 | 1.053  |
| -0.075 | -2.200  | -0.699  | 0       | 0      | 2.200   | 0.700  | 0.872 | 0.788 | 1.049  |
| -0.110 | -17.500 | -11.199 | 0       | 0      | 17.500  | 11.200 | 0.062 | 0.145 | 1.033  |
| -0.119 | 0       | 0       | 0       | 0      | 0       | 0      | 0.258 | 0.526 | 1.037  |
| -0.107 | -3.200  | -1.599  | 0       | 0      | 3.200   | 1.600  | 0.464 | 0.938 | 1.034  |
| -0.128 | -8.700  | -2.399  | 0       | 4.300  | 8.700   | 6.700  | 0.113 | 0.227 | 1.025  |
| -0.148 | 0       | 0       | 0       | 0      | 0       | 0      | 0.252 | 0.564 | 1.018  |
| -0.155 | -3.499  | -2.299  | 0       | 0      | 3.500   | 2.300  | 0.008 | 0.022 | 1.0004 |
| -0.156 | 0       | 0       | 0       | 0      | 0       | 0      | 0.064 | 0.139 | 1.022  |
| -0.116 | 0       | 0       | 0       | 0      | 0       | 0      | 0.034 | 0.070 | 1.015  |
| -0.178 | -2.400  | -0.900  | 0       | 0      | 2.400   | 0.900  | 0.017 | 0.035 | 1.002  |
| -0.193 | -10.600 | -1.900  | 0       | 0      | 10.600  | 1.900  | 0.521 | 1.053 | 0.991  |
|        |         |         |         |        |         |        | 0.054 | 0.084 |        |
|        |         |         |         |        |         |        | 0.078 | 0.159 |        |
|        |         |         |         |        |         |        | 0.064 | 0.111 |        |
|        |         |         |         |        |         |        | 0.044 | 0.066 |        |
|        |         |         |         |        |         |        | 0.017 | 0.033 |        |
|        |         |         |         |        |         |        | 0     | 0.457 |        |
|        |         |         |         |        |         |        | 0.086 | 0.163 |        |
|        |         |         |         |        |         |        | 0.162 | 0.305 |        |
|        |         |         |         |        |         |        | 0.033 | 0.063 |        |
|        |         |         |         |        |         |        | 0.006 | 0.018 |        |
|        |         |         |         |        |         |        | 0.027 | 0.099 |        |

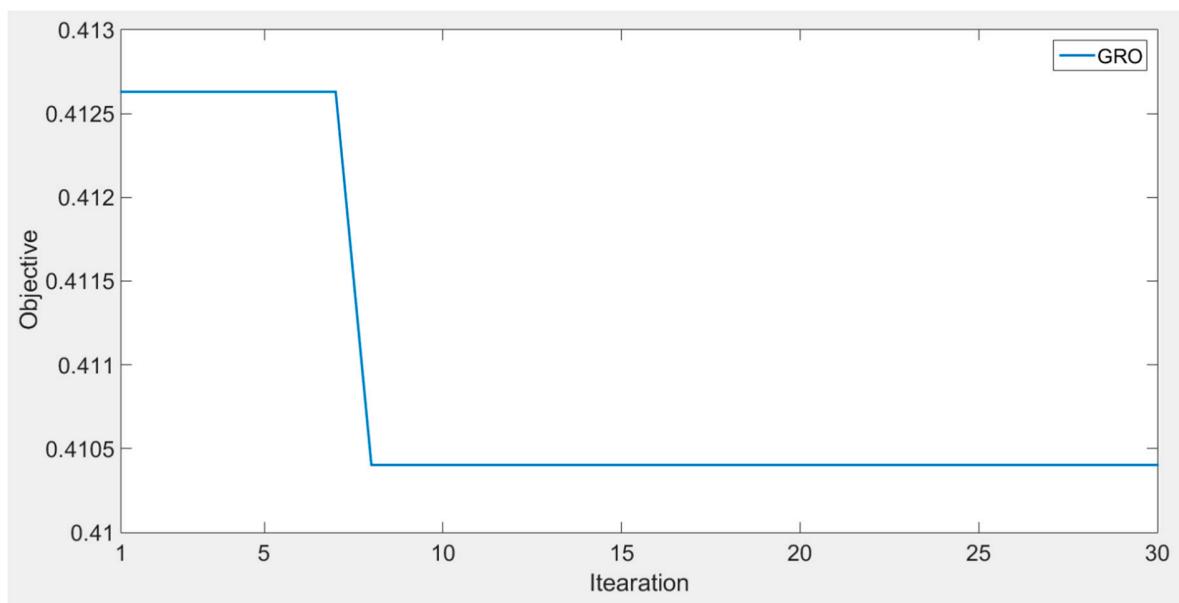

**Figure S37. Algorithm Convergent GRO, 30-bus, and 2DG**

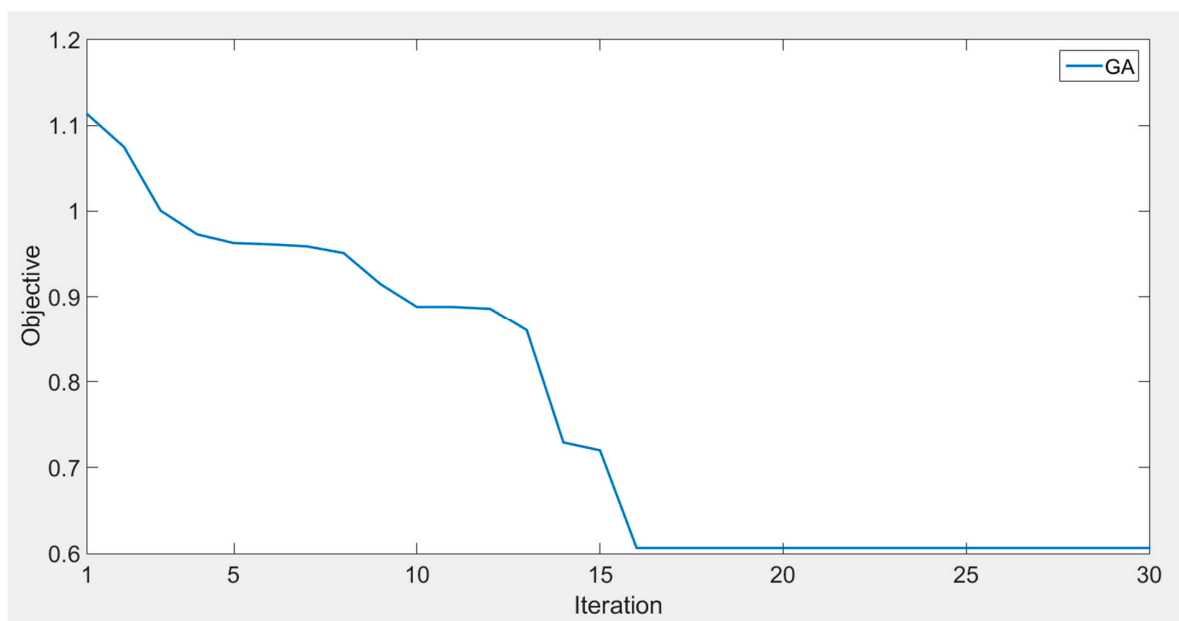

**Figure S38. Algorithm Convergent GA, 30-bus, and 2DG**



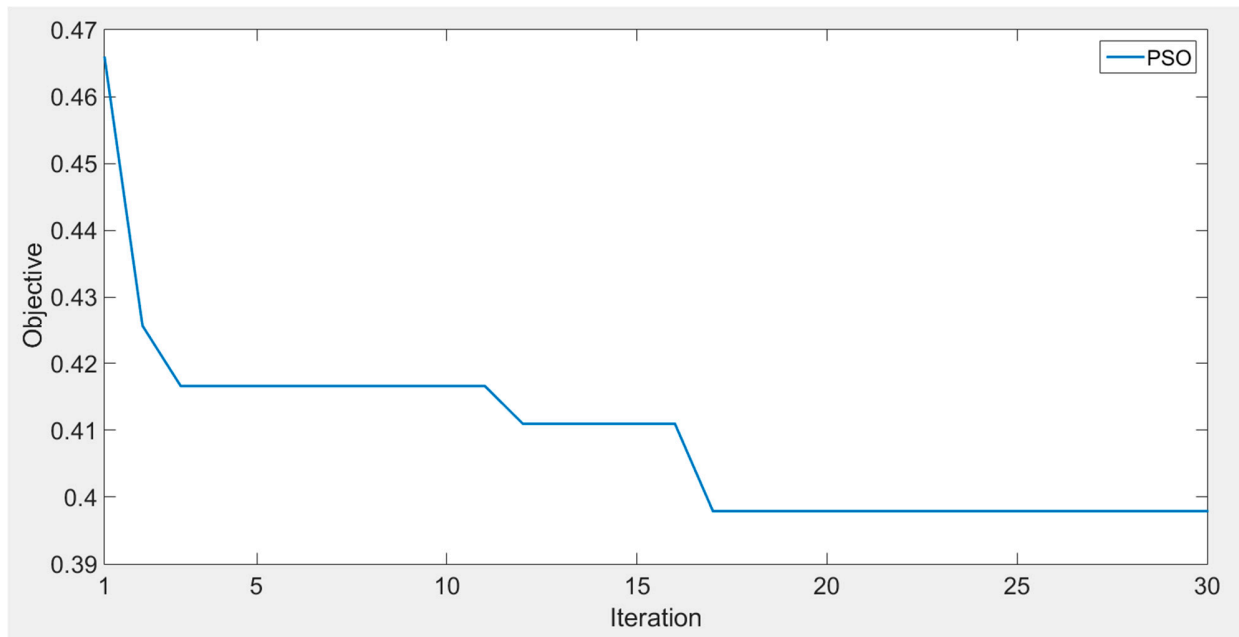

**Figure S39. Algorithm Convergent PSO, 30-bus, and 2DG**

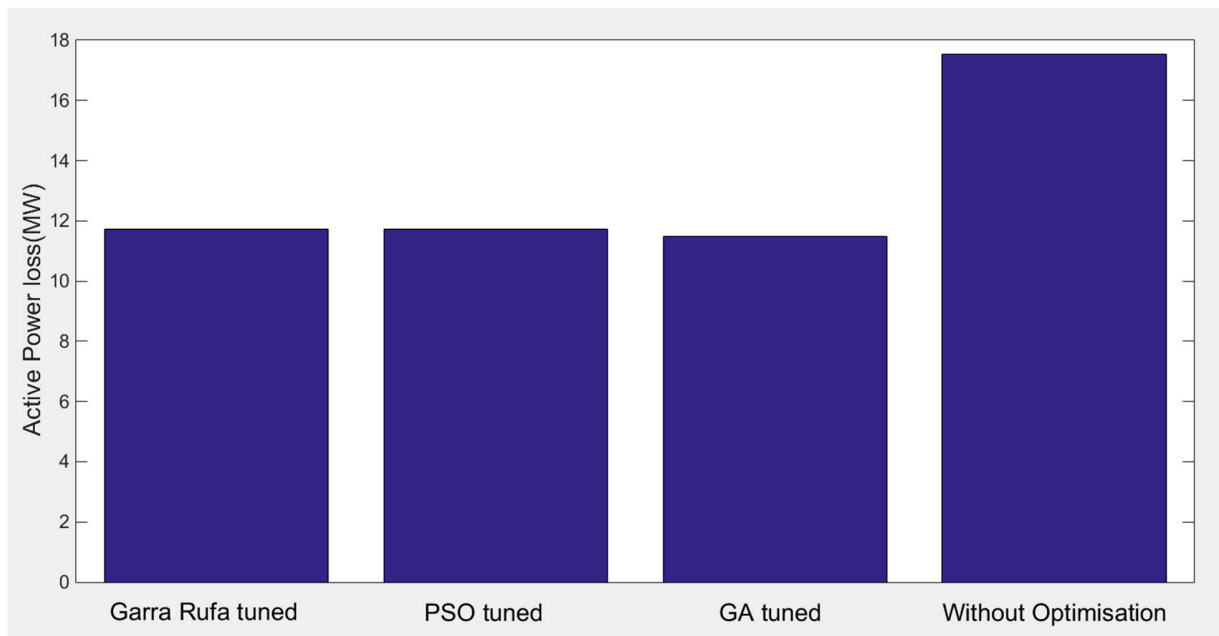

**Figure S40. Active Power Losses 2DG and 30-bus**

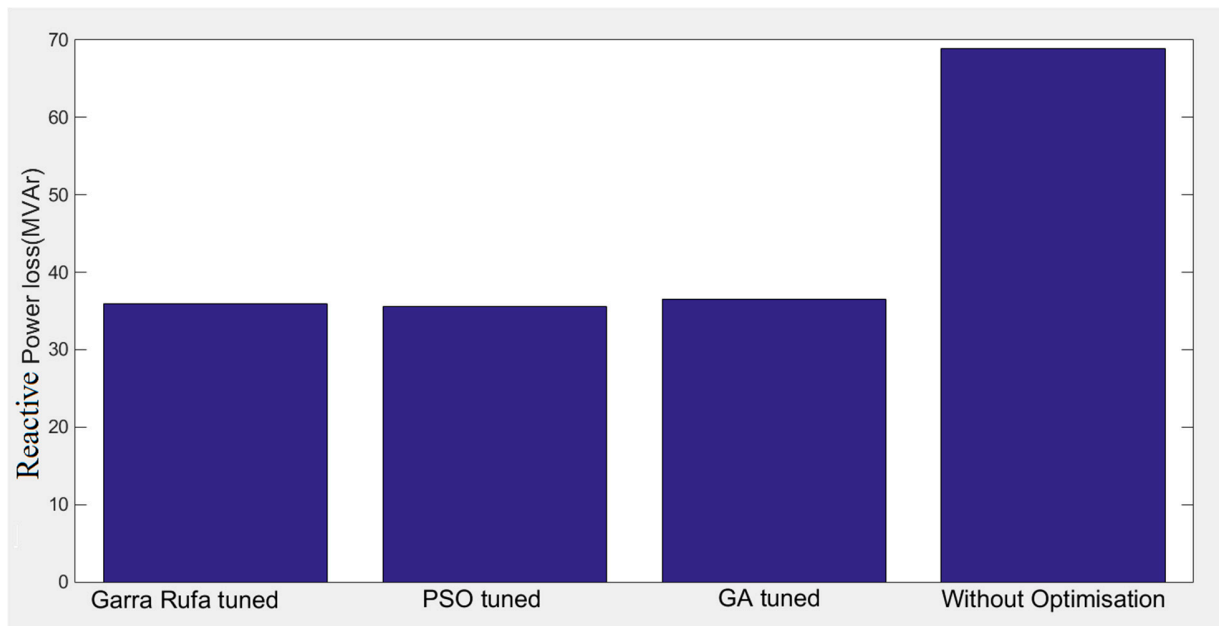

**Figure S41. Reactive Power Losses 2DG and 30-bus**

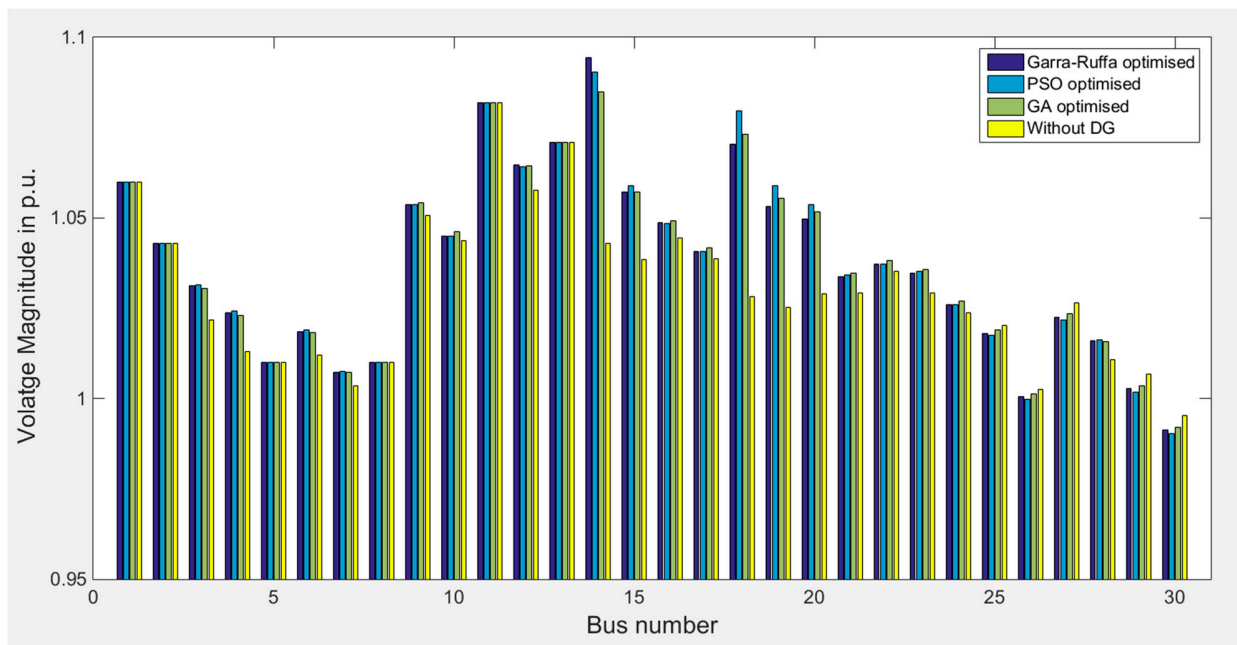

**Figure S42. Voltage Profile 2DG and 30-bus**

**Table S23. load flow results GA, 30-bus, and 3 DG**

| Delta  | Pi      | qi      | Pg      | Qg     | pl      | Ql     | PLs    | Qls   | V     |
|--------|---------|---------|---------|--------|---------|--------|--------|-------|-------|
| 0      | 104.158 | 14.125  | 104.158 | 14.125 | 0       | 0      | 0.918  | 2.751 | 1.060 |
| -0.036 | 18.299  | 8.500   | 39.999  | 21.200 | 21.700  | 12.700 | 0.443  | 1.621 | 1.043 |
| -0.042 | -2.400  | -1.199  | 0       | 0      | 2.400   | 1.200  | 0.112  | 0.342 | 1.030 |
| -0.051 | -7.600  | -1.600  | 0       | 0      | 7.600   | 1.600  | 0.115  | 0.331 | 1.022 |
| -0.151 | -94.200 | 14.194  | 0       | 33.194 | 94.200  | 19     | 1.693  | 7.115 | 1.010 |
| -0.058 | 0       | 0       | 0       | 0      | 0       | 0      | 0.178  | 0.542 | 1.019 |
| -0.105 | -22.800 | -10.899 | 0       | 0      | 22.800  | 10.900 | 0.035  | 0.123 | 1.007 |
| -0.041 | 37.387  | -39.699 | 0       | -9.699 | -37.387 | 30     | 0.632  | 1.593 | 1.010 |
| -0.064 | 0       | 0       | 0       | 0      | 0       | 0      | 0.867  | 2.662 | 1.058 |
| -0.068 | -5.800  | 16.999  | 0       | 18.999 | 5.800   | 2      | 0.226  | 0.791 | 1.054 |
| -0.064 | 0       | 12.260  | 0       | 12.260 | 0       | 0      | 0      | 0.775 | 1.082 |
| -0.085 | -11.200 | -7.499  | 0       | 0      | 11.200  | 7.500  | 0      | 0.250 | 1.059 |
| -0.085 | 0       | 8.654   | 0       | 8.654  | 0       | 0      | 0      | 0.267 | 1.071 |
| -0.095 | -6.200  | -1.600  | 0       | 0      | 6.200   | 1.600  | 0      | 0.026 | 1.045 |
| -0.091 | -8.200  | -2.500  | 0       | 0      | 8.200   | 2.500  | 0      | 1.091 | 1.044 |
| -0.061 | -3.499  | -1.799  | 0       | 0      | 3.500   | 1.800  | 0      | 0.091 | 1.059 |
| -0.033 | 60.359  | -5.800  | 0       | 0      | -60.359 | 5.800  | 0.046  | 0.097 | 1.065 |
| -0.095 | -3.199  | -0.899  | 0       | 0      | 3.200   | 0.900  | 0.089  | 0.176 | 1.035 |
| -0.094 | -9.499  | -3.399  | 0       | 0      | 9.500   | 3.400  | 0.129  | 0.272 | 1.033 |
| -0.088 | -2.200  | -0.699  | 0       | 0      | 2.200   | 0.700  | 0.004  | 0.003 | 1.038 |
| -0.082 | -17.500 | -11.200 | 0       | 0      | 17.500  | 11.200 | 0.168  | 0.393 | 1.038 |
| -0.077 | 0       | 0       | 0       | 0      | 0       | 0      | 0.015  | 0.030 | 1.045 |
| -0.083 | -3.199  | -1.600  | 0       | 0      | 3.200   | 1.600  | 0.001  | 0.002 | 1.038 |
| -0.086 | -8.700  | -2.400  | 0       | 4.299  | 8.700   | 6.700  | 0.030  | 0.061 | 1.033 |
| -0.086 | 0       | 0       | 0       | 0      | 0       | 0      | 0.128  | 0.288 | 1.028 |
| -0.093 | -3.499  | -2.299  | 0       | 0      | 3.500   | 2.300  | 0.590  | 1.540 | 1.011 |
| -0.082 | 0       | 0       | 0       | 0      | 0       | 0      | 0.229  | 0.494 | 1.034 |
| -0.058 | 0       | 0       | 0       | 0      | 0       | 0      | 0.041  | 0.086 | 1.018 |
| -0.075 | 7.162   | -0.900  | 0       | 0      | -7.162  | 0.900  | 0.005  | 0.011 | 1.029 |
| -0.102 | -10.600 | -1.899  | 0       | 0      | 10.600  | 1.900  | 0.019  | 0.040 | 1.012 |
|        |         |         |         |        |         |        | 0.066  | 0.103 |       |
|        |         |         |         |        |         |        | 0.005  | 0.011 |       |
|        |         |         |         |        |         |        | 0.002  | 0.004 |       |
|        |         |         |         |        |         |        | 0.043  | 0.065 |       |
|        |         |         |         |        |         |        | 0.011  | 0.021 |       |
|        |         |         |         |        |         |        | 0      | 0.230 |       |
|        |         |         |         |        |         |        | 0.006  | 0.011 |       |
|        |         |         |         |        |         |        | 0.063  | 0.119 |       |
|        |         |         |         |        |         |        | 0.094  | 0.177 |       |
|        |         |         |         |        |         |        | 0.048  | 0.151 |       |
|        |         |         |         |        |         |        | 0.0006 | 0.002 |       |

**Table S24. load flow results PSO, 30-bus, and 3 DG**

| Delta  | Pi      | qi      | Pg     | Qg     | Pl      | ql     | PLs   | Qls   | V     |
|--------|---------|---------|--------|--------|---------|--------|-------|-------|-------|
| 0      | 76.081  | 19.444  | 76.081 | 19.444 | 0       | 0      | 0.545 | 1.634 | 1.060 |
| -0.026 | 18.299  | -0.197  | 39.999 | 12.502 | 21.700  | 12.700 | 0.230 | 0.842 | 1.043 |
| -0.027 | -2.400  | -1.200  | 0      | 0      | 2.400   | 1.200  | 0.048 | 0.148 | 1.034 |
| -0.032 | -7.600  | -1.600  | 0      | 0      | 7.600   | 1.600  | 0.059 | 0.170 | 1.027 |
| -0.133 | -94.200 | 10.899  | 0      | 29.899 | 94.200  | 19     | 1.492 | 6.269 | 1.010 |
| -0.035 | 0       | 0       | 0      | 0      | 0       | 0      | 0.061 | 0.187 | 1.026 |
| -0.084 | -22.800 | -10.900 | 0      | 0      | 22.800  | 10.900 | 0.005 | 0.017 | 1.011 |
| -0.021 | 28.858  | -30.346 | 0      | -0.346 | -28.858 | 30     | 0.723 | 1.824 | 1.020 |
| -0.033 | 0       | 0       | 0      | 0      | 0       | 0      | 0.971 | 2.983 | 1.060 |
| -0.032 | -5.800  | 17.000  | 0      | 19.000 | 5.800   | 2      | 0.153 | 0.538 | 1.055 |
| -0.033 | 0       | 11.131  | 0      | 11.131 | 0       | 0      | 0     | 0.581 | 1.082 |
| -0.056 | -11.200 | -7.500  | 0      | 0      | 11.200  | 7.500  | 0     | 0.157 | 1.059 |
| -0.056 | 0       | 8.431   | 0      | 8.431  | 0       | 0      | 0     | 0.220 | 1.071 |
| -0.064 | -6.199  | -1.599  | 0      | 0      | 6.200   | 1.600  | 0     | 0.027 | 1.045 |
| -0.059 | -8.199  | -2.499  | 0      | 0      | 8.200   | 2.500  | 0     | 0.690 | 1.044 |
| -0.028 | -3.499  | -1.800  | 0      | 0      | 3.500   | 1.800  | 0     | 0.086 | 1.060 |
| 0.002  | 61.849  | -5.800  | 0      | 0      | -61.850 | 5.800  | 0.042 | 0.088 | 1.066 |
| -0.061 | -3.199  | -0.899  | 0      | 0      | 3.200   | 0.900  | 0.075 | 0.148 | 1.036 |
| -0.059 | -9.500  | -3.400  | 0      | 0      | 9.500   | 3.400  | 0.167 | 0.351 | 1.034 |
| -0.053 | -2.199  | -0.699  | 0      | 0      | 2.200   | 0.700  | 0.008 | 0.007 | 1.039 |
| -0.044 | -17.499 | -11.199 | 0      | 0      | 17.500  | 11.200 | 0.208 | 0.485 | 1.039 |
| -0.032 | 0       | 0       | 0      | 0      | 0       | 0      | 0.013 | 0.028 | 1.046 |
| -0.045 | -3.200  | -1.600  | 0      | 0      | 3.200   | 1.600  | 0.002 | 0.004 | 1.039 |
| -0.031 | -8.699  | -2.399  | 0      | 4.300  | 8.700   | 6.700  | 0.033 | 0.066 | 1.035 |
| 0.007  | 0       | 0       | 0      | 0      | 0       | 0      | 0.137 | 0.306 | 1.036 |
| 0.0008 | -3.499  | -2.299  | 0      | 0      | 3.500   | 2.300  | 0.585 | 1.525 | 1.018 |
| 0.036  | 0       | 0       | 0      | 0      | 0       | 0      | 0.195 | 0.421 | 1.045 |
| -0.024 | 0       | 0       | 0      | 0      | 0       | 0      | 0.019 | 0.041 | 1.028 |
| 0.138  | 43.651  | -0.900  | 0      | 0      | -43.651 | 0.900  | 0.002 | 0.004 | 1.087 |
| 0.073  | -10.599 | -1.899  | 0      | 0      | 10.600  | 1.900  | 0.047 | 0.095 | 1.049 |
|        |         |         |        |        |         |        | 0.031 | 0.048 |       |
|        |         |         |        |        |         |        | 0.029 | 0.059 |       |
|        |         |         |        |        |         |        | 0.223 | 0.389 |       |
|        |         |         |        |        |         |        | 0.042 | 0.064 |       |
|        |         |         |        |        |         |        | 0.194 | 0.371 |       |
|        |         |         |        |        |         |        | 0     | 1.138 |       |
|        |         |         |        |        |         |        | 1.350 | 2.551 |       |
|        |         |         |        |        |         |        | 0.104 | 0.195 |       |
|        |         |         |        |        |         |        | 0.571 | 1.079 |       |
|        |         |         |        |        |         |        | 0.013 | 0.041 |       |
|        |         |         |        |        |         |        | 0.050 | 0.180 |       |

**Table S25. load flow results GRO, 30-bus, and 3 DG**

| Delta  | Pi      | qi      | Pg     | Qg     | pl      | ql     | PLs   | QLs   | V     |
|--------|---------|---------|--------|--------|---------|--------|-------|-------|-------|
| 0      | 53.896  | 26.009  | 53.896 | 26.009 | 0       | 0      | 0.335 | 1.006 | 1.060 |
| -0.017 | 18.299  | -0.840  | 39.999 | 11.859 | 21.700  | 12.700 | 0.141 | 0.518 | 1.043 |
| -0.014 | -2.399  | -1.199  | 0      | 0      | 2.400   | 1.200  | 0.041 | 0.127 | 1.033 |
| -0.016 | -7.600  | -1.599  | 0      | 0      | 7.600   | 1.600  | 0.038 | 0.111 | 1.027 |
| -0.118 | -94.200 | 11.551  | 0      | 30.551 | 94.200  | 19     | 1.343 | 5.646 | 1.010 |
| -0.014 | 0       | 0       | 0      | 0      | 0       | 0      | 0.052 | 0.160 | 1.025 |
| -0.065 | -22.800 | -10.900 | 0      | 0      | 22.800  | 10.900 | 0.007 | 0.026 | 1.011 |
| 0.014  | 71.799  | -39.687 | 0      | -9.687 | -71.799 | 30     | 0.848 | 2.139 | 1.020 |
| -0.017 | 0       | 0       | 0      | 0      | 0       | 0      | 1.074 | 3.299 | 1.061 |
| -0.018 | -5.799  | 17.00   | 0      | 19.000 | 5.800   | 2      | 0.555 | 1.944 | 1.057 |
| -0.017 | 0       | 10.548  | 0      | 10.548 | 0       | 0      | 0     | 0.642 | 1.082 |
| -0.041 | -11.199 | -7.499  | 0      | 0      | 11.200  | 7.500  | 0     | 0.196 | 1.061 |
| -0.041 | 0       | 7.615   | 0      | 7.615  | 0       | 0      | 0     | 0.197 | 1.071 |
| -0.050 | -6.200  | -1.600  | 0      | 0      | 6.200   | 1.600  | 0     | 0.016 | 1.047 |
| -0.045 | -8.200  | -2.500  | 0      | 0      | 8.200   | 2.500  | 0     | 0.750 | 1.046 |
| -0.014 | -3.499  | -1.800  | 0      | 0      | 3.500   | 1.800  | 0     | 0.070 | 1.062 |
| 0.0165 | 63.297  | -5.800  | 0      | 0      | -63.297 | 5.800  | 0.042 | 0.087 | 1.069 |
| -0.048 | -3.200  | -0.900  | 0      | 0      | 3.200   | 0.900  | 0.072 | 0.143 | 1.038 |
| -0.046 | -9.499  | -3.399  | 0      | 0      | 9.500   | 3.400  | 0.166 | 0.350 | 1.036 |
| -0.040 | -2.200  | -0.700  | 0      | 0      | 2.200   | 0.700  | 0.006 | 0.005 | 1.041 |
| -0.032 | -17.499 | -11.200 | 0      | 0      | 17.500  | 11.200 | 0.209 | 0.488 | 1.042 |
| -0.024 | 0       | 0       | 0      | 0      | 0       | 0      | 0.012 | 0.025 | 1.049 |
| -0.033 | -3.199  | -1.600  | 0      | 0      | 3.200   | 1.600  | 0.001 | 0.003 | 1.041 |
| -0.030 | -8.699  | -2.399  | 0      | 4.300  | 8.700   | 6.700  | 0.033 | 0.067 | 1.038 |
| -0.015 | 0       | 0       | 0      | 0      | 0       | 0      | 0.139 | 0.310 | 1.037 |
| -0.022 | -3.499  | -2.299  | 0      | 0      | 3.500   | 2.300  | 0.615 | 1.606 | 1.020 |
| -0.002 | 0       | 0       | 0      | 0      | 0       | 0      | 0.222 | 0.479 | 1.045 |
| -0.007 | 0       | 0       | 0      | 0      | 0       | 0      | 0.027 | 0.056 | 1.026 |
| 0.037  | 19.723  | -0.900  | 0      | 0      | -19.723 | 0.900  | 0.005 | 0.010 | 1.058 |
| -0.002 | -10.600 | -1.900  | 0      | 0      | 10.600  | 1.900  | 0.033 | 0.067 | 1.034 |
|        |         |         |        |        |         |        | 0.043 | 0.066 |       |
|        |         |         |        |        |         |        | 0.003 | 0.007 |       |
|        |         |         |        |        |         |        | 0.031 | 0.054 |       |
|        |         |         |        |        |         |        | 0.042 | 0.064 |       |
|        |         |         |        |        |         |        | 0.052 | 0.099 |       |
|        |         |         |        |        |         |        | 0     | 0.104 |       |
|        |         |         |        |        |         |        | 0.191 | 0.361 |       |
|        |         |         |        |        |         |        | 0.009 | 0.018 |       |
|        |         |         |        |        |         |        | 0.214 | 0.404 |       |
|        |         |         |        |        |         |        | 0.080 | 0.251 |       |
|        |         |         |        |        |         |        | 0.019 | 0.069 |       |

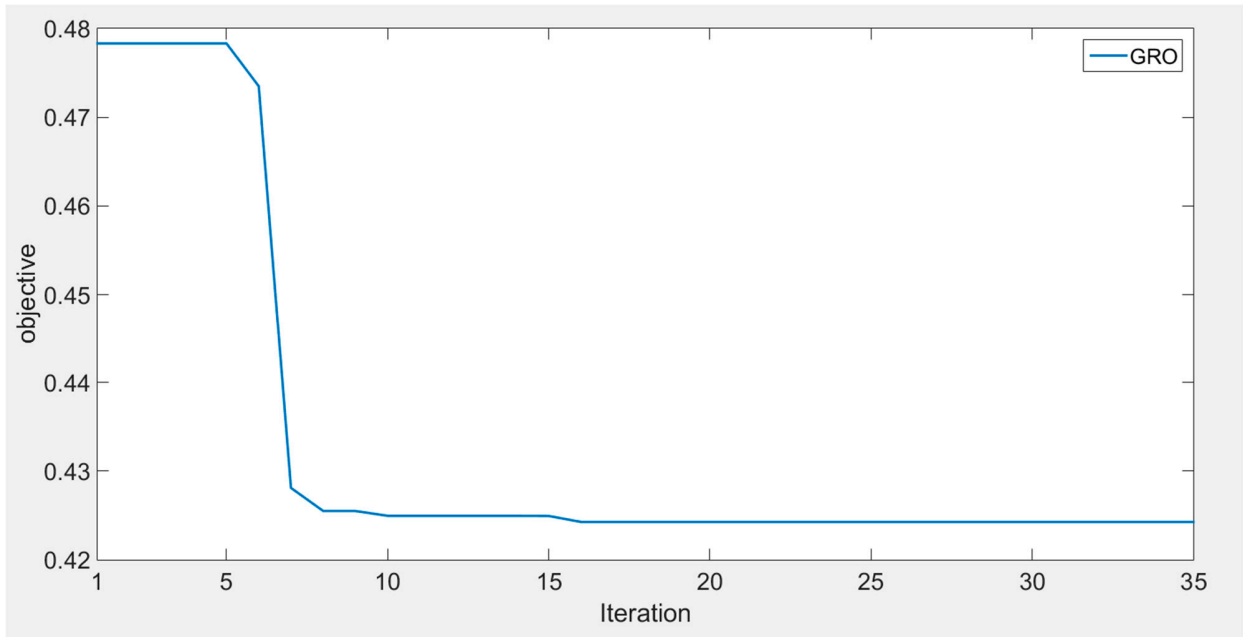

**Figure S43. Algorithm Convergent GRO, 30-bus, and 3DG**

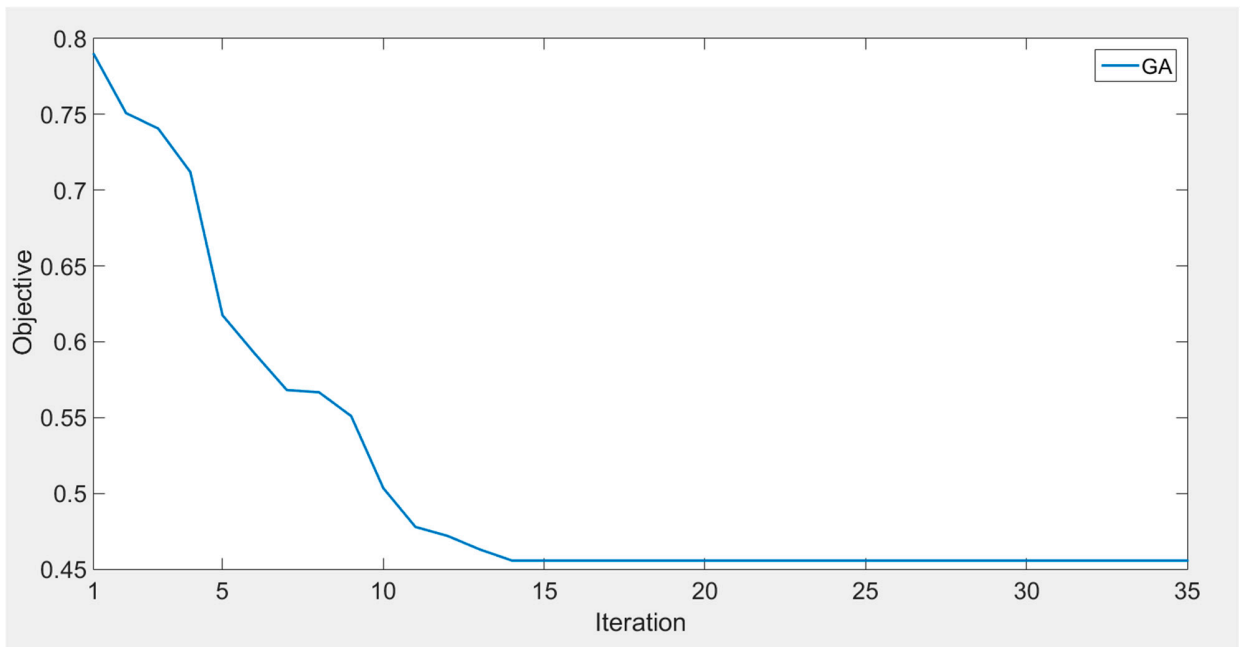

**Figure S44. Algorithm Convergent GA, 30-bus, and 3DG**

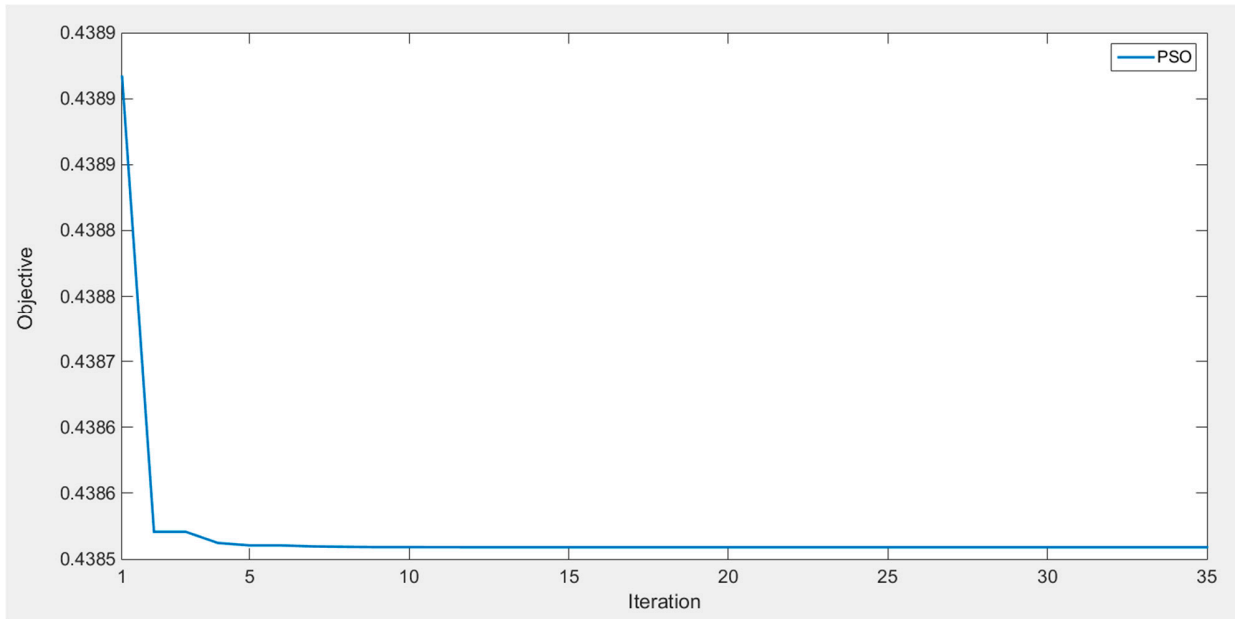

**Figure S45. Algorithm Convergent PSO, 30-bus, and 3DG**

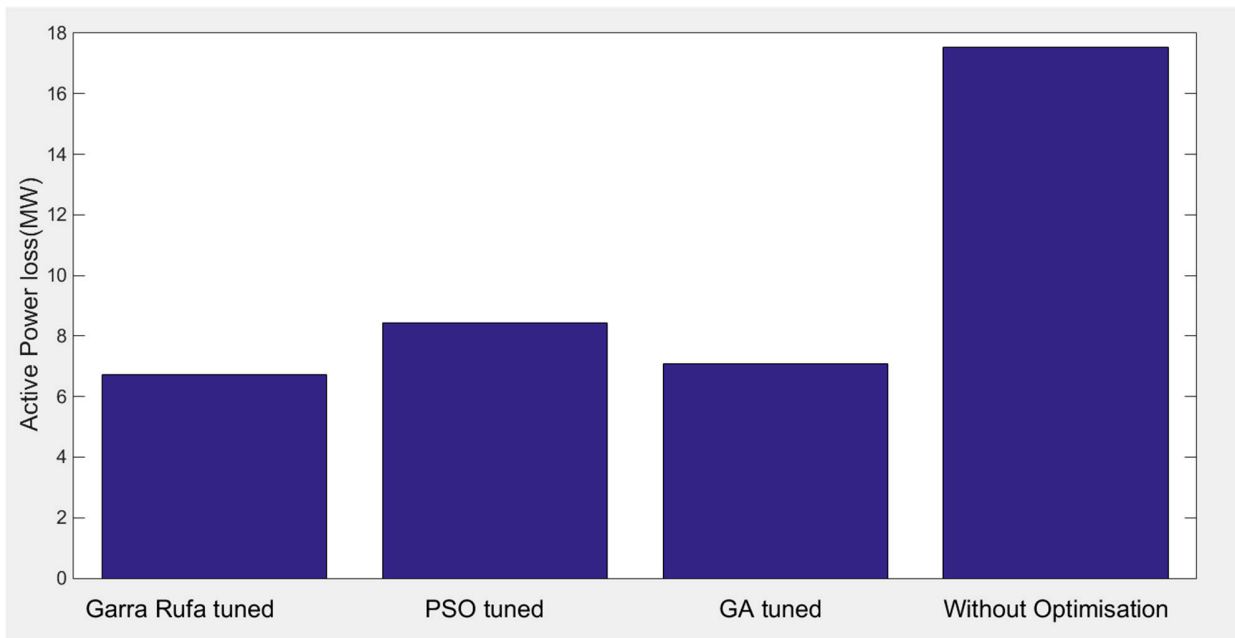

**Figure S46. Active Power Losses 3DG and 30-bus**

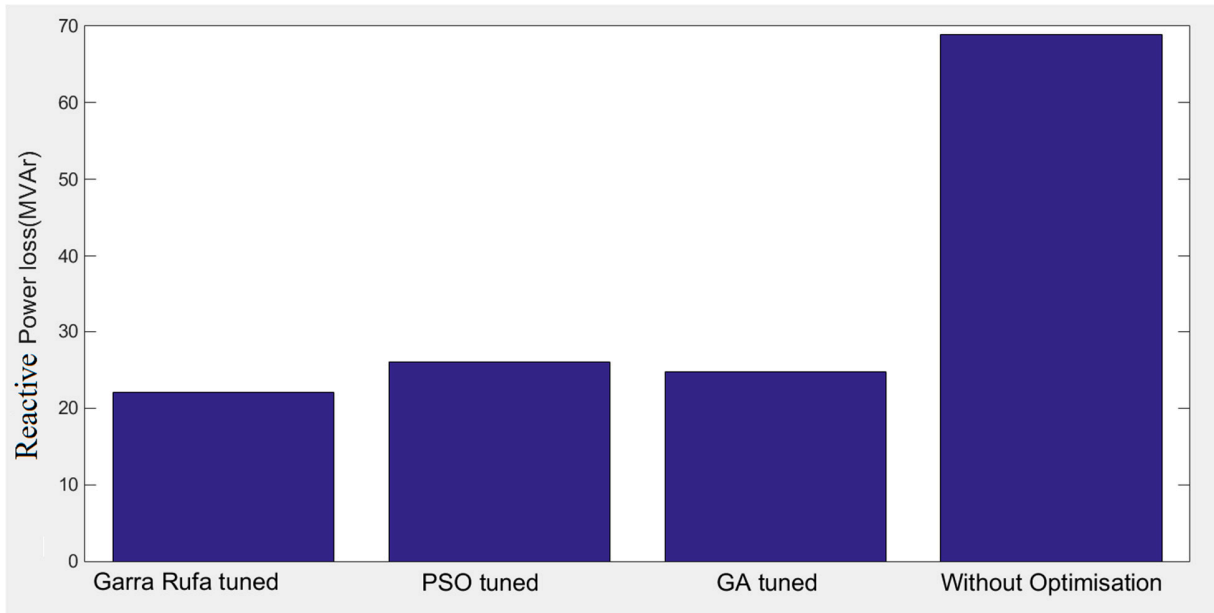

**Figure S47. Reactive Power Losses 3DG and 30-bus**

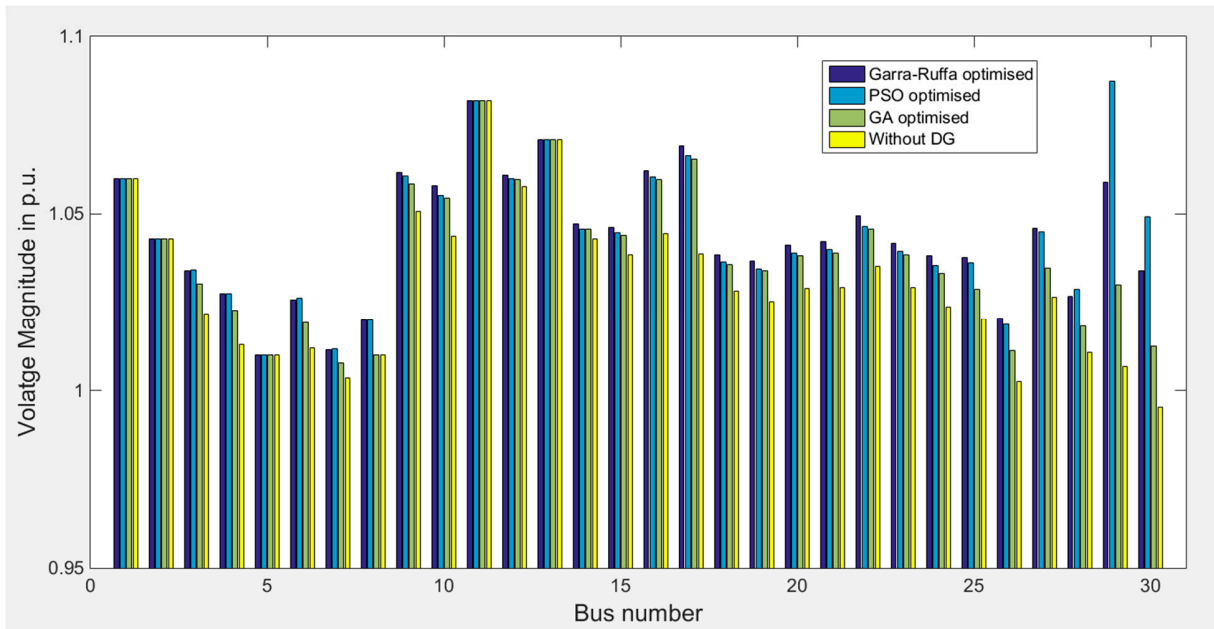

**Figure S48. Voltage Profile 3DG and 30-bus**



**Table S26. load flow results GA, 30-bus, and 4 DG**

| Delta  | Pi      | qi      | Pg      | Qg     | pl      | ql     | PLs   | Qls   | V     |
|--------|---------|---------|---------|--------|---------|--------|-------|-------|-------|
| 0      | 136.803 | 4.777   | 136.803 | 4.777  | 0       | 0      | 1.525 | 4.568 | 1.060 |
| -0.048 | 18.300  | 9.344   | 40.000  | 22.044 | 21.700  | 12.700 | 0.746 | 2.728 | 1.043 |
| -0.060 | -2.400  | -1.200  | 0       | 0      | 2.400   | 1.200  | 0.176 | 0.537 | 1.031 |
| -0.073 | -7.599  | -1.599  | 0       | 0      | 7.600   | 1.600  | 0.196 | 0.562 | 1.024 |
| -0.172 | -94.200 | 12.918  | 0       | 31.918 | 94.200  | 19     | 1.957 | 8.225 | 1.010 |
| -0.090 | 0       | 0       | 0       | 0      | 0       | 0      | 0.398 | 1.208 | 1.020 |
| -0.133 | -22.799 | -10.899 | 0       | 0      | 22.800  | 10.900 | 0.195 | 0.680 | 1.008 |
| -0.098 | -29.999 | -25.802 | 0       | 4.197  | 30      | 30     | 0.465 | 1.172 | 1.010 |
| -0.077 | 0       | 0       | 0       | 0      | 0       | 0      | 0.725 | 2.226 | 1.060 |
| -0.070 | 24.956  | 16.999  | 0       | 18.999 | -24.956 | 2      | 0.116 | 0.406 | 1.057 |
| -0.077 | 0       | 11.425  | 0       | 11.425 | 0       | 0      | 0     | 0.843 | 1.082 |
| -0.089 | -11.199 | -7.499  | 0       | 0      | 11.200  | 7.500  | 0     | 0.322 | 1.060 |
| -0.089 | 0       | 7.904   | 0       | 7.904  | 0       | 0      | 0     | 0.231 | 1.071 |
| -0.092 | -6.200  | -1.599  | 0       | 0      | 6.200   | 1.600  | 0     | 0.056 | 1.048 |
| -0.083 | -8.199  | -2.500  | 0       | 0      | 8.200   | 2.500  | 0     | 0.677 | 1.052 |
| -0.076 | -3.500  | -1.799  | 0       | 0      | 3.500   | 1.800  | 0     | 0.076 | 1.056 |
| -0.059 | 21.849  | -5.799  | 0       | 0      | -21.849 | 5.800  | 0.023 | 0.048 | 1.058 |
| -0.051 | 27.639  | -0.900  | 0       | 0      | -27.639 | 0.900  | 0.038 | 0.075 | 1.061 |
| -0.064 | -9.500  | -3.400  | 0       | 0      | 9.500   | 3.400  | 0.040 | 0.085 | 1.052 |
| -0.067 | -2.199  | -0.699  | 0       | 0      | 2.200   | 0.700  | 0.028 | 0.025 | 1.052 |
| -0.081 | -17.500 | -11.199 | 0       | 0      | 17.500  | 11.200 | 0.061 | 0.143 | 1.042 |
| -0.077 | 0       | 0       | 0       | 0      | 0       | 0      | 0.224 | 0.456 | 1.048 |
| -0.082 | -3.200  | -1.600  | 0       | 0      | 3.200   | 1.600  | 0.090 | 0.182 | 1.042 |
| -0.085 | -8.700  | -2.399  | 0       | 4.300  | 8.700   | 6.700  | 0.003 | 0.007 | 1.036 |
| -0.081 | 0       | 0       | 0       | 0      | 0       | 0      | 0.006 | 0.014 | 1.032 |
| -0.088 | -3.500  | -2.300  | 0       | 0      | 3.500   | 2.300  | 0.052 | 0.136 | 1.014 |
| -0.074 | 0       | 0       | 0       | 0      | 0       | 0      | 0.172 | 0.371 | 1.038 |
| -0.091 | 0       | 0       | 0       | 0      | 0       | 0      | 0.033 | 0.068 | 1.021 |
| -0.034 | 19.615  | -0.900  | 0       | 0      | -19.615 | 0.900  | 0.001 | 0.002 | 1.051 |
| -0.074 | -10.600 | -1.899  | 0       | 0      | 10.600  | 1.900  | 0.017 | 0.036 | 1.026 |
|        |         |         |         |        |         |        | 0.052 | 0.081 |       |
|        |         |         |         |        |         |        | 0.006 | 0.013 |       |
|        |         |         |         |        |         |        | 0.004 | 0.008 |       |
|        |         |         |         |        |         |        | 0.043 | 0.064 |       |
|        |         |         |         |        |         |        | 0.016 | 0.031 |       |
|        |         |         |         |        |         |        | 0     | 0.152 |       |
|        |         |         |         |        |         |        | 0.191 | 0.361 |       |
|        |         |         |         |        |         |        | 0.009 | 0.018 |       |
|        |         |         |         |        |         |        | 0.216 | 0.408 |       |
|        |         |         |         |        |         |        | 0.026 | 0.082 |       |
|        |         |         |         |        |         |        | 0     | 0.000 |       |

**Table S27. load flow results PSO, 30-bus, and 4 DG**

| Delta  | Pi      | qi      | Pg      | Qg     | PI       | QI     | PLs   | QIs   | V     |
|--------|---------|---------|---------|--------|----------|--------|-------|-------|-------|
| 0      | 132.46  | 5.847   | 132.465 | 5.847  | 0        | 0      | 1.436 | 4.301 | 1.060 |
| -0.047 | 18.300  | 8.848   | 40.000  | 21.548 | 21.700   | 12.700 | 0.697 | 2.550 | 1.043 |
| -0.058 | -2.400  | -1.199  | 0       | 0      | 2.400    | 1.200  | 0.163 | 0.498 | 1.031 |
| -0.070 | -7.599  | -1.599  | 0       | 0      | 7.600    | 1.600  | 0.182 | 0.524 | 1.024 |
| -0.169 | -94.200 | 12.898  | 0       | 31.898 | 94.200   | 19     | 1.923 | 8.080 | 1.010 |
| -0.086 | 0       | 0       | 0       | 0      | 0        | 0      | 0.362 | 1.098 | 1.021 |
| -0.129 | -22.800 | -10.900 | 0       | 0      | 22.800   | 10.900 | 0.173 | 0.602 | 1.008 |
| -0.094 | -30.000 | -26.479 | 0       | 3.520  | 30       | 30     | 0.482 | 1.216 | 1.010 |
| -0.074 | 0       | 0       | 0       | 0      | 0        | 0      | 0.741 | 2.277 | 1.059 |
| -0.068 | 20.687  | 16.999  | 0       | 18.999 | -20.687  | 2      | 0.112 | 0.394 | 1.055 |
| -0.074 | 0       | 11.686  | 0       | 11.686 | 0        | 0      | 0     | 0.802 | 1.082 |
| -0.087 | -11.200 | -7.500  | 0       | 0      | 11.200   | 7.500  | 0     | 0.290 | 1.060 |
| -0.087 | 0       | 8.126   | 0       | 8.126  | 0        | 0      | 0     | 0.242 | 1.071 |
| -0.090 | -6.199  | -1.599  | 0       | 0      | 6.200    | 1.600  | 0     | 0.051 | 1.048 |
| -0.080 | -8.200  | -2.500  | 0       | 0      | 8.200    | 2.500  | 0     | 0.671 | 1.051 |
| -0.074 | -3.500  | -1.799  | 0       | 0      | 3.500    | 1.800  | 0     | 0.080 | 1.055 |
| -0.057 | 21.850  | -5.800  | 0       | 0      | -21.850  | 5.800  | 0.023 | 0.049 | 1.057 |
| -0.048 | 27.650  | -0.899  | 0       | 0      | -27.650  | 0.900  | 0.040 | 0.079 | 1.060 |
| -0.062 | -9.500  | -3.400  | 0       | 0      | 9.500    | 3.400  | 0.039 | 0.083 | 1.051 |
| -0.064 | -2.200  | -0.700  | 0       | 0      | 2.200    | 0.700  | 0.028 | 0.025 | 1.051 |
| -0.078 | -17.499 | -11.199 | 0       | 0      | 17.500   | 11.200 | 0.059 | 0.139 | 1.041 |
| -0.073 | 0       | 0       | 0       | 0      | 0        | 0      | 0.220 | 0.449 | 1.047 |
| -0.079 | -3.199  | -1.599  | 0       | 0      | 3.200    | 1.600  | 0.092 | 0.187 | 1.041 |
| -0.077 | -8.700  | -2.399  | 0       | 4.300  | 8.700    | 6.700  | 0.004 | 0.008 | 1.036 |
| -0.062 | 0       | 0       | 0       | 0      | 0        | 0      | 0.006 | 0.014 | 1.033 |
| -0.069 | -3.499  | -2.299  | 0       | 0      | 3.500    | 2.300  | 0.053 | 0.140 | 1.015 |
| -0.048 | 0       | 0       | 0       | 0      | 0        | 0      | 0.158 | 0.340 | 1.039 |
| -0.084 | 0       | 0       | 0       | 0      | 0        | 0      | 0.024 | 0.050 | 1.021 |
| 0.014  | 28.450  | -0.900  | 0       | 0      | -28.4500 | 0.900  | 0.000 | 0.001 | 1.064 |
| -0.034 | -10.600 | -1.899  | 0       | 0      | 10.600   | 1.900  | 0.019 | 0.038 | 1.034 |
|        |         |         |         |        |          |        | 0.038 | 0.059 |       |
|        |         |         |         |        |          |        | 0.004 | 0.009 |       |
|        |         |         |         |        |          |        | 0.034 | 0.060 |       |
|        |         |         |         |        |          |        | 0.043 | 0.064 |       |
|        |         |         |         |        |          |        | 0.049 | 0.094 |       |
|        |         |         |         |        |          |        | 0     | 0.444 |       |
|        |         |         |         |        |          |        | 0.502 | 0.948 |       |
|        |         |         |         |        |          |        | 0.016 | 0.030 |       |
|        |         |         |         |        |          |        | 0.329 | 0.623 |       |
|        |         |         |         |        |          |        | 0.034 | 0.107 |       |
|        |         |         |         |        |          |        | 0.002 | 0.008 |       |

**Table S28. load flow results GRO, 30-bus, and 4 DG**

| Delta  | Pi      | qi      | Pg     | Qg     | pl      | ql     | PLs   | Qls   | V     |
|--------|---------|---------|--------|--------|---------|--------|-------|-------|-------|
| 0      | 75.395  | 19.666  | 75.395 | 19.666 | 0       | 0      | 0.562 | 1.683 | 1.060 |
| -0.026 | 18.299  | 1.604   | 39.999 | 14.304 | 21.700  | 12.700 | 0.208 | 0.761 | 1.043 |
| -0.024 | -2.400  | -1.200  | 0      | 0      | 2.400   | 1.200  | 0.043 | 0.131 | 1.033 |
| -0.029 | -7.600  | -1.599  | 0      | 0      | 7.600   | 1.600  | 0.054 | 0.155 | 1.027 |
| -0.135 | -94.199 | 12.097  | 0      | 31.097 | 94.200  | 19     | 1.543 | 6.483 | 1.010 |
| -0.038 | 0       | 0       | 0      | 0      | 0       | 0      | 0.087 | 0.266 | 1.023 |
| -0.087 | -22.800 | -10.900 | 0      | 0      | 22.800  | 10.900 | 0.066 | 0.230 | 1.010 |
| -0.045 | -30     | -33.824 | 0      | -3.824 | 30      | 30     | 0.703 | 1.772 | 1.010 |
| 0.014  | 0       | 0       | 0      | 0      | 0       | 0      | 0.945 | 2.903 | 1.062 |
| 0.042  | 60.711  | 17.000  | 0      | 19.000 | -60.711 | 2      | 0.146 | 0.514 | 1.061 |
| 0.014  | 0       | 10.155  | 0      | 10.155 | 0       | 0      | 0     | 2.263 | 1.082 |
| -0.006 | -11.200 | -7.499  | 0      | 0      | 11.200  | 7.500  | 0     | 1.599 | 1.058 |
| -0.006 | 0       | 9.923   | 0      | 9.923  | 0       | 0      | 0     | 0.183 | 1.071 |
| -0.005 | -6.200  | -1.600  | 0      | 0      | 6.200   | 1.600  | 0     | 0.797 | 1.046 |
| 0.008  | -8.200  | -2.499  | 0      | 0      | 8.200   | 2.500  | 0     | 0.638 | 1.051 |
| 0.027  | -3.500  | -1.799  | 0      | 0      | 3.500   | 1.800  | 0     | 0.120 | 1.060 |
| 0.063  | 47.195  | -5.800  | 0      | 0      | -47.195 | 5.800  | 0.022 | 0.046 | 1.068 |
| 0.041  | 22.688  | -0.900  | 0      | 0      | -22.688 | 0.900  | 0.088 | 0.173 | 1.059 |
| 0.034  | -9.500  | -3.399  | 0      | 0      | 9.500   | 3.400  | 0.247 | 0.521 | 1.052 |
| 0.035  | -2.200  | -0.699  | 0      | 0      | 2.200   | 0.700  | 0.056 | 0.051 | 1.053 |
| 0.025  | -17.500 | -11.200 | 0      | 0      | 17.500  | 11.200 | 0.293 | 0.684 | 1.045 |
| 0.031  | 0       | 0       | 0      | 0      | 0       | 0      | 0.238 | 0.485 | 1.052 |
| 0.023  | -3.199  | -1.599  | 0      | 0      | 3.200   | 1.600  | 0.032 | 0.066 | 1.045 |
| 0.018  | -8.700  | -2.399  | 0      | 4.300  | 8.700   | 6.700  | 0.002 | 0.004 | 1.038 |
| 0.009  | 0       | 0       | 0      | 0      | 0       | 0      | 0.020 | 0.044 | 1.030 |
| 0.002  | -3.500  | -2.299  | 0      | 0      | 3.500   | 2.300  | 0.214 | 0.558 | 1.013 |
| 0.008  | 0       | 0       | 0      | 0      | 0       | 0      | 0.284 | 0.612 | 1.034 |
| -0.035 | 0       | 0       | 0      | 0      | 0       | 0      | 0.059 | 0.123 | 1.023 |
| 0.060  | 23.817  | -0.900  | 0      | 0      | -23.817 | 0.900  | 0.014 | 0.028 | 1.053 |
| 0.015  | -10.600 | -1.899  | 0      | 0      | 10.600  | 1.900  | 0.055 | 0.111 | 1.025 |
|        |         |         |        |        |         |        | 0.094 | 0.147 |       |
|        |         |         |        |        |         |        | 0.010 | 0.020 |       |
|        |         |         |        |        |         |        | 0.018 | 0.031 |       |
|        |         |         |        |        |         |        | 0.043 | 0.064 |       |
|        |         |         |        |        |         |        | 0.003 | 0.006 |       |
|        |         |         |        |        |         |        | 0     | 0.570 |       |
|        |         |         |        |        |         |        | 0.323 | 0.611 |       |
|        |         |         |        |        |         |        | 0.008 | 0.016 |       |
|        |         |         |        |        |         |        | 0.269 | 0.509 |       |
|        |         |         |        |        |         |        | 0.041 | 0.129 |       |
|        |         |         |        |        |         |        | 0.005 | 0.019 |       |

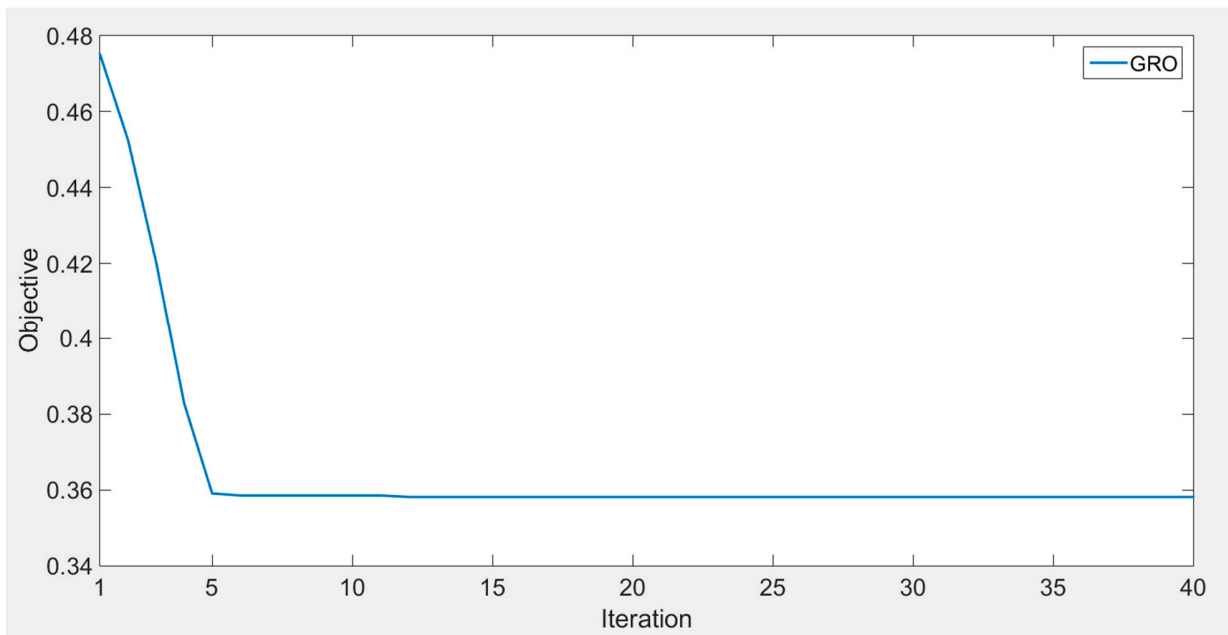

**Figure S49. Algorithm Convergent GRO, 30-bus, and 4DG**

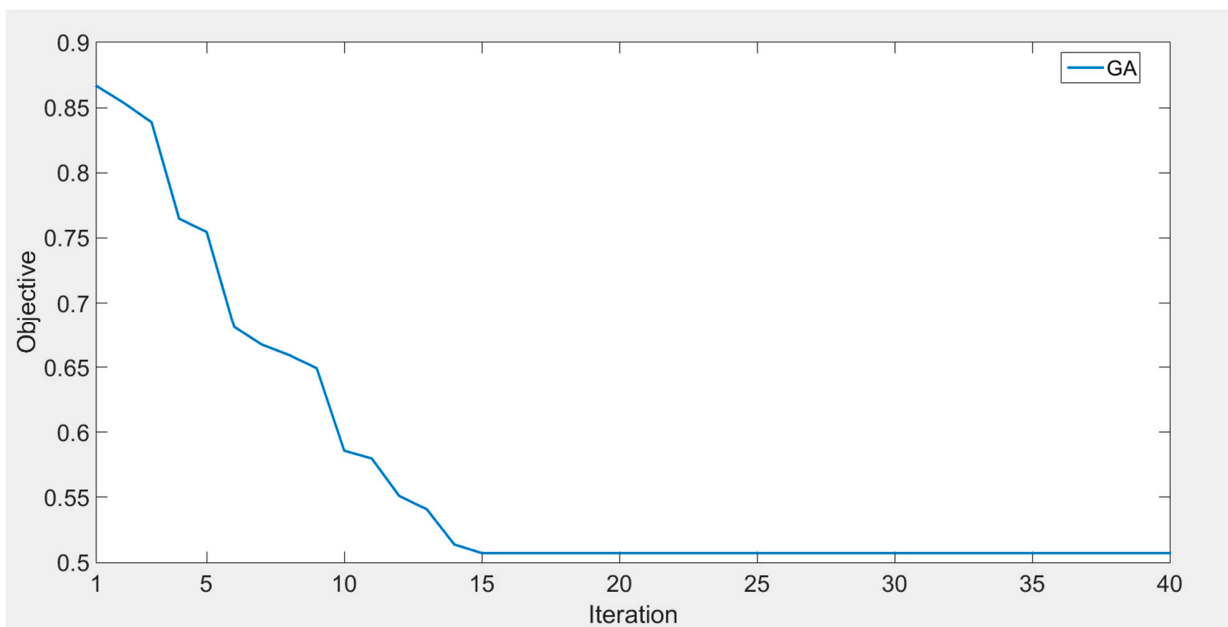

**Figure S50. Algorithm Convergent GA, 30-bus, and 4DG**

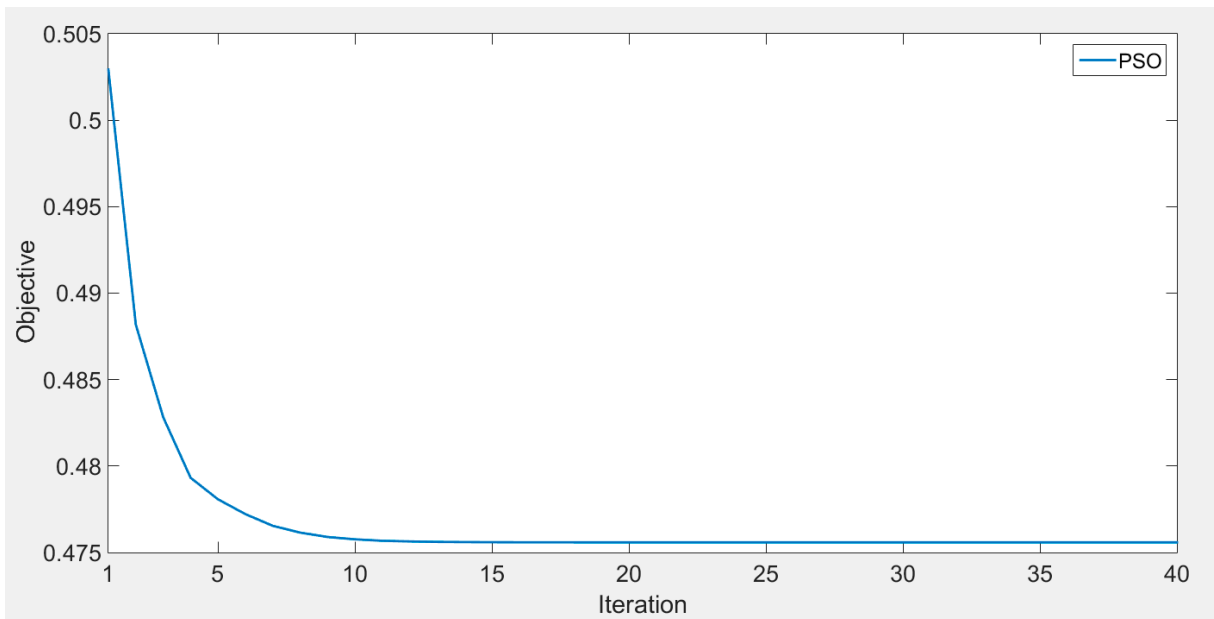

**Figure S51. Algorithm Convergent PSO, 30-bus, and 4DG**

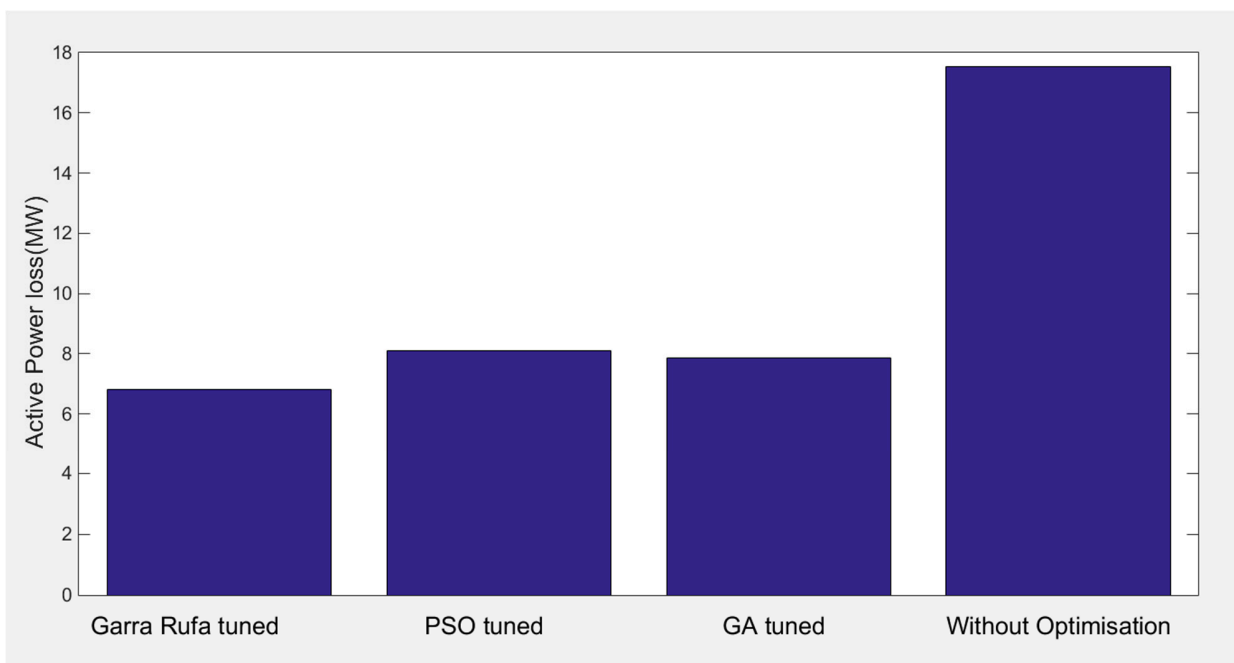

**Figure S52. Active Power Losses 4DG and 30-bus**

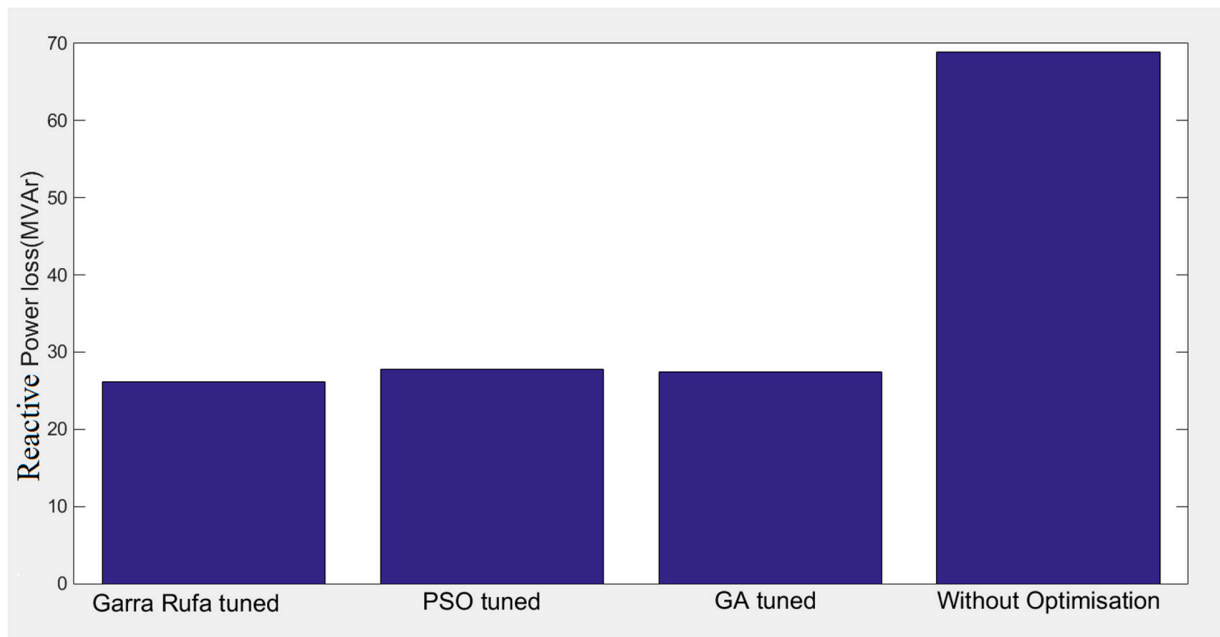

**Figure S53. Reactive Power Losses 4DG and 30-bus**

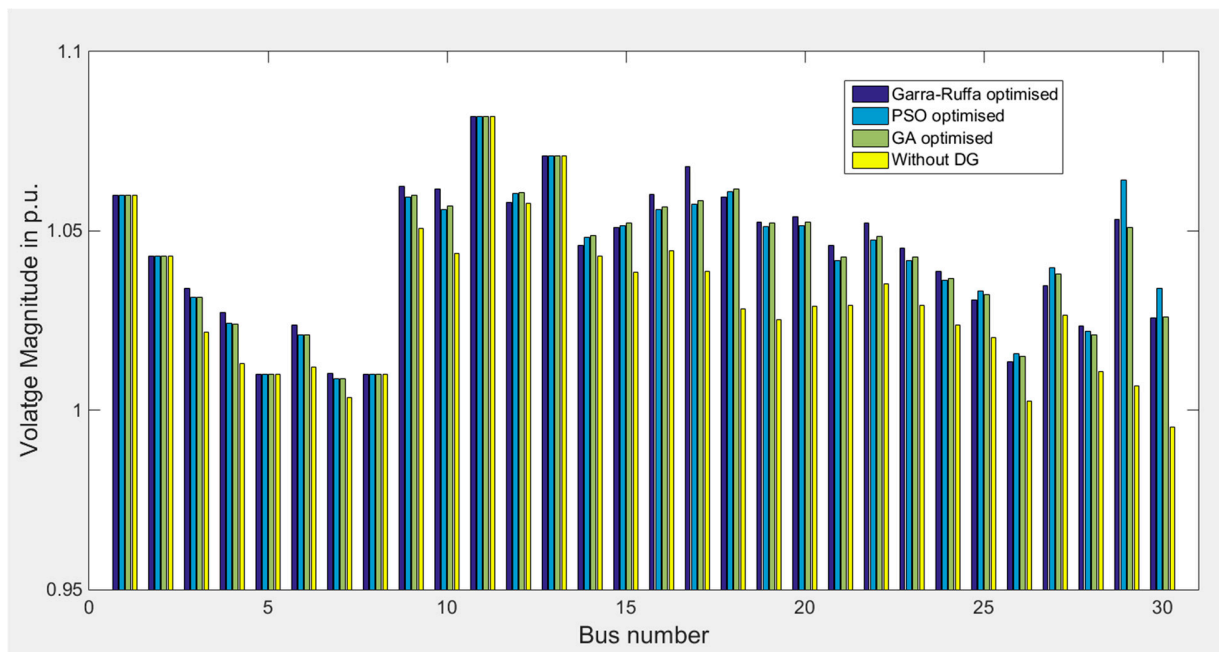

**Figure S54. Voltage Profile 4DG and 30-bus**

**Table S29. load flow results GA, 30-bus, and 5 DG**

| Delta  | Pi      | qi      | Pg     | Qg     | Pl      | Ql     | PLs    | Qls    | V     |
|--------|---------|---------|--------|--------|---------|--------|--------|--------|-------|
| 0      | 51.183  | 26.583  | 51.183 | 26.583 | 0       | 0      | 0.301  | 0.903  | 1.060 |
| -0.016 | 18.300  | -1.981  | 40.000 | 10.718 | 21.700  | 12.700 | 0.141  | 0.516  | 1.043 |
| -0.015 | -2.400  | -1.199  | 0      | 0      | 2.400   | 1.200  | 0.039  | 0.119  | 1.034 |
| -0.017 | -7.599  | -1.600  | 0      | 0      | 7.600   | 1.600  | 0.038  | 0.110  | 1.027 |
| -0.099 | -94.199 | 5.756   | 0      | 24.756 | 94.200  | 19     | 0.952  | 4.003  | 1.010 |
| -0.020 | 0       | 0       | 0      | 0      | 0       | 0      | 0.063  | 0.193  | 1.024 |
| -0.038 | 28.019  | -10.900 | 0      | 0      | -28.019 | 10.900 | 0.014  | 0.051  | 1.019 |
| -0.025 | -30.000 | -35.567 | 0      | -5.567 | 30      | 30     | 1.161  | 2.928  | 1.010 |
| -0.003 | 0       | 0       | 0      | 0      | 0       | 0      | 0.126  | 0.388  | 1.057 |
| -0.035 | -5.800  | 17.000  | 0      | 19.000 | 5.800   | 2      | 0.139  | 0.487  | 1.052 |
| 0.073  | 42.210  | 14.442  | 0      | 14.442 | -42.210 | 0      | 0      | 0.705  | 1.082 |
| -0.013 | 35.261  | -7.499  | 0      | 0      | -35.261 | 7.500  | 0      | 0.191  | 1.066 |
| -0.013 | 0       | 3.233   | 0      | 3.233  | 0       | 0      | 0      | 3.536  | 1.071 |
| -0.027 | -6.199  | -1.600  | 0      | 0      | 6.200   | 1.600  | 0      | 1.098  | 1.053 |
| -0.029 | -8.200  | -2.500  | 0      | 0      | 8.200   | 2.500  | 0      | 0.640  | 1.049 |
| -0.027 | -3.500  | -1.799  | 0      | 0      | 3.500   | 1.800  | 0      | 0.0127 | 1.053 |
| -0.036 | -9.000  | -5.800  | 0      | 0      | 9       | 5.800  | 0.065  | 0.135  | 1.047 |
| -0.029 | 7.604   | -0.899  | 0      | 0      | -7.604  | 0.900  | 0.176  | 0.347  | 1.045 |
| -0.038 | -9.499  | -3.399  | 0      | 0      | 9.500   | 3.400  | 0.079  | 0.166  | 1.039 |
| -0.039 | -2.200  | -0.700  | 0      | 0      | 2.200   | 0.700  | 0.003  | 0.002  | 1.041 |
| -0.043 | -17.499 | -11.199 | 0      | 0      | 17.500  | 11.200 | 0.025  | 0.059  | 1.038 |
| -0.043 | 0       | 0       | 0      | 0      | 0       | 0      | 0.003  | 0.006  | 1.044 |
| -0.043 | -3.200  | -1.600  | 0      | 0      | 3.200   | 1.600  | 0.041  | 0.084  | 1.038 |
| -0.053 | -8.700  | -2.400  | 0      | 4.299  | 8.700   | 6.700  | 0.002  | 0.005  | 1.032 |
| -0.060 | 0       | 0       | 0      | 0      | 0       | 0      | 0.020  | 0.045  | 1.029 |
| -0.067 | -3.500  | -2.300  | 0      | 0      | 3.500   | 2.300  | 0.010  | 0.026  | 1.011 |
| -0.060 | 0       | 0       | 0      | 0      | 0       | 0      | 0.128  | 0.277  | 1.035 |
| -0.008 | 46.125  | 0       | 0      | 0      | -46.125 | 0      | 0.035  | 0.073  | 1.025 |
| -0.081 | -2.400  | -0.900  | 0      | 0      | 2.400   | 0.900  | 0.0001 | 0.0002 | 1.016 |
| -0.096 | -10.600 | -1.899  | 0      | 0      | 10.600  | 1.900  | 0.067  | 0.135  | 1.004 |
|        |         |         |        |        |         |        | 0.056  | 0.087  |       |
|        |         |         |        |        |         |        | 0.020  | 0.041  |       |
|        |         |         |        |        |         |        | 0.009  | 0.016  |       |
|        |         |         |        |        |         |        | 0.043  | 0.065  |       |
|        |         |         |        |        |         |        | 0.008  | 0.016  |       |
|        |         |         |        |        |         |        | 0      | 0.790  |       |
|        |         |         |        |        |         |        | 0.084  | 0.158  |       |
|        |         |         |        |        |         |        | 0.158  | 0.297  |       |
|        |         |         |        |        |         |        | 0.032  | 0.061  |       |
|        |         |         |        |        |         |        | 0.080  | 0.253  |       |
|        |         |         |        |        |         |        | 0.072  | 0.257  |       |

**Table S30. load flow results PSO, 30-bus, and 5 DG**

| Delta  | Pi      | qi      | pg     | Qg     | Pl      | ql     | PLs   | Qls    | V     |
|--------|---------|---------|--------|--------|---------|--------|-------|--------|-------|
| 0      | 68.671  | 22.375  | 68.671 | 22.375 | 0       | 0      | 0.436 | 1.306  | 1.060 |
| -0.022 | 18.300  | 0.095   | 40.000 | 12.795 | 21.700  | 12.700 | 0.228 | 0.834  | 1.043 |
| -0.026 | -2.400  | -1.200  | 0      | 0      | 2.400   | 1.200  | 0.062 | 0.190  | 1.033 |
| -0.031 | -7.599  | -1.599  | 0      | 0      | 7.600   | 1.600  | 0.059 | 0.170  | 1.026 |
| -0.109 | -94.200 | 5.996   | 0      | 24.996 | 94.200  | 19     | 1.037 | 4.358  | 1.010 |
| -0.033 | 0       | 0       | 0      | 0      | 0       | 0      | 0.087 | 0.264  | 1.023 |
| -0.050 | 26.356  | -10.899 | 0      | 0      | -26.356 | 10.900 | 0.008 | 0.029  | 1.018 |
| -0.038 | -29.999 | -34.375 | 0      | -4.375 | 30      | 30     | 1.068 | 2.693  | 1.010 |
| -0.027 | 0       | 0       | 0      | 0      | 0       | 0      | 0.121 | 0.372  | 1.059 |
| -0.053 | -5.799  | 17.000  | 0      | 19.000 | 5.800   | 2      | 0.128 | 0.449  | 1.055 |
| 0.028  | 30.601  | 12.649  | 0      | 12.649 | -30.601 | 0      | 0     | 0.651  | 1.082 |
| -0.054 | -3.580  | -7.499  | 0      | 0      | 3.580   | 7.500  | 0     | 0.269  | 1.063 |
| -0.054 | 0       | 5.770   | 0      | 5.770  | 0       | 0      | 0     | 1.948  | 1.071 |
| -0.058 | -6.199  | -1.599  | 0      | 0      | 6.200   | 1.600  | 0     | 0.739  | 1.051 |
| -0.050 | -8.200  | -2.499  | 0      | 0      | 8.200   | 2.500  | 0     | 0.838  | 1.055 |
| -0.059 | -3.500  | -1.800  | 0      | 0      | 3.500   | 1.800  | 0     | 0.040  | 1.053 |
| -0.059 | -9.000  | -5.799  | 0      | 0      | 9       | 5.800  | 0.023 | 0.048  | 1.049 |
| -0.011 | 38.102  | -0.900  | 0      | 0      | -38.102 | 0.900  | 0.028 | 0.055  | 1.068 |
| -0.031 | -9.500  | -3.399  | 0      | 0      | 9.500   | 3.400  | 0.025 | 0.052  | 1.056 |
| -0.038 | -2.199  | -0.699  | 0      | 0      | 2.200   | 0.700  | 0.021 | 0.019  | 1.054 |
| -0.061 | -17.500 | -11.200 | 0      | 0      | 17.500  | 11.200 | 0.002 | 0.005  | 1.042 |
| -0.061 | 0       | 0       | 0      | 0      | 0       | 0      | 0.353 | 0.720  | 1.047 |
| -0.061 | -3.199  | -1.599  | 0      | 0      | 3.200   | 1.600  | 0.199 | 0.402  | 1.042 |
| -0.070 | -8.699  | -2.399  | 0      | 4.300  | 8.700   | 6.700  | 0.027 | 0.054  | 1.036 |
| -0.075 | 0       | 0       | 0      | 0      | 0       | 0      | 0.048 | 0.108  | 1.031 |
| -0.082 | -3.499  | -2.299  | 0      | 0      | 3.500   | 2.300  | 0.025 | 0.066  | 1.014 |
| -0.073 | 0       | 0       | 0      | 0      | 0       | 0      | 0.126 | 0.273  | 1.038 |
| -0.019 | 50.850  | 0       | 0      | 0      | -50.850 | 0      | 0.033 | 0.070  | 1.026 |
| -0.094 | -2.400  | -0.900  | 0      | 0      | 2.400   | 0.900  | 0     | 0.0001 | 1.018 |
| -0.109 | -10.600 | -1.900  | 0      | 0      | 10.600  | 1.900  | 0.059 | 0.120  | 1.007 |
|        |         |         |        |        |         |        | 0.053 | 0.083  |       |
|        |         |         |        |        |         |        | 0.017 | 0.034  |       |
|        |         |         |        |        |         |        | 0.005 | 0.009  |       |
|        |         |         |        |        |         |        | 0.043 | 0.064  |       |
|        |         |         |        |        |         |        | 0.007 | 0.014  |       |
|        |         |         |        |        |         |        | 0     | 0.858  |       |
|        |         |         |        |        |         |        | 0.083 | 0.158  |       |
|        |         |         |        |        |         |        | 0.157 | 0.296  |       |
|        |         |         |        |        |         |        | 0.032 | 0.061  |       |
|        |         |         |        |        |         |        | 0.090 | 0.285  |       |
|        |         |         |        |        |         |        | 0.096 | 0.343  |       |



**Table S31. load flow results GRO, 30-bus, and 5 DG**

| Delta  | Pi      | qi      | Pg     | Qg     | pl      | Ql     | PLs   | Qls   | V     |
|--------|---------|---------|--------|--------|---------|--------|-------|-------|-------|
| 0      | 51.051  | 28.160  | 51.051 | 28.160 | 0       | 0      | 0.266 | 0.799 | 1.060 |
| -0.014 | 18.300  | -1.793  | 40.000 | 10.906 | 21.700  | 12.700 | 0.187 | 0.686 | 1.043 |
| -0.020 | -2.399  | -1.199  | 0      | 0      | 2.400   | 1.200  | 0.070 | 0.213 | 1.032 |
| -0.023 | -7.600  | -1.599  | 0      | 0      | 7.600   | 1.600  | 0.050 | 0.144 | 1.025 |
| -0.078 | -94.199 | 0.856   | 0      | 19.856 | 94.200  | 19     | 0.618 | 2.597 | 1.010 |
| -0.020 | 0       | 0       | 0      | 0      | 0       | 0      | 0.071 | 0.216 | 1.023 |
| -0.008 | 75.668  | -10.899 | 0      | 0      | -75.668 | 10.900 | 0.007 | 0.026 | 1.026 |
| -0.026 | -30.000 | -33.743 | 0      | -3.743 | 30      | 30     | 1.592 | 4.015 | 1.010 |
| -0.016 | 0       | 0       | 0      | 0      | 0       | 0      | 0.063 | 0.194 | 1.058 |
| -0.060 | -5.800  | 16.999  | 0      | 18.999 | 5.800   | 2      | 0.139 | 0.488 | 1.054 |
| 0.070  | 47.781  | 14.520  | 0      | 14.520 | -47.781 | 0      | 0     | 0.595 | 1.082 |
| -0.069 | -3.751  | -7.499  | 0      | 0      | 3.751   | 7.500  | 0     | 0.497 | 1.062 |
| -0.069 | 0       | 6.777   | 0      | 6.777  | 0       | 0      | 0     | 4.430 | 1.071 |
| -0.079 | -6.199  | -1.599  | 0      | 0      | 6.200   | 1.600  | 0     | 2.030 | 1.048 |
| -0.075 | -8.200  | -2.500  | 0      | 0      | 8.200   | 2.500  | 0     | 1.532 | 1.047 |
| -0.070 | -3.500  | -1.800  | 0      | 0      | 3.500   | 1.800  | 0     | 0.056 | 1.052 |
| -0.067 | -9.000  | -5.800  | 0      | 0      | 9       | 5.800  | 0.044 | 0.092 | 1.048 |
| -0.072 | 4.356   | -0.900  | 0      | 0      | -4.356  | 0.900  | 0.080 | 0.158 | 1.043 |
| -0.076 | -9.499  | -3.399  | 0      | 0      | 9.500   | 3.400  | 0.019 | 0.041 | 1.038 |
| -0.073 | -2.200  | -0.700  | 0      | 0      | 2.200   | 0.700  | 0.003 | 0.003 | 1.042 |
| -0.072 | -17.500 | -11.199 | 0      | 0      | 17.500  | 11.200 | 0.004 | 0.010 | 1.039 |
| -0.068 | 0       | 0       | 0      | 0      | 0       | 0      | 0.005 | 0.011 | 1.046 |
| -0.073 | -3.200  | -1.600  | 0      | 0      | 3.200   | 1.600  | 0.009 | 0.019 | 1.039 |
| -0.077 | -8.700  | -2.399  | 0      | 4.300  | 8.700   | 6.700  | 0.011 | 0.022 | 1.034 |
| -0.077 | 0       | 0       | 0      | 0      | 0       | 0      | 0.059 | 0.133 | 1.031 |
| -0.085 | -3.500  | -2.300  | 0      | 0      | 3.500   | 2.300  | 0.033 | 0.086 | 1.013 |
| -0.073 | 0       | 0       | 0      | 0      | 0       | 0      | 0.190 | 0.410 | 1.037 |
| -0.014 | 35.144  | 0       | 0      | 0      | -35.144 | 0      | 0.037 | 0.076 | 1.024 |
| -0.094 | -2.399  | -0.899  | 0      | 0      | 2.400   | 0.900  | 0.002 | 0.005 | 1.018 |
| -0.109 | -10.600 | -1.900  | 0      | 0      | 10.600  | 1.900  | 0.012 | 0.025 | 1.006 |
|        |         |         |        |        |         |        | 0.058 | 0.091 |       |
|        |         |         |        |        |         |        | 0.006 | 0.013 |       |
|        |         |         |        |        |         |        | 0.001 | 0.002 |       |
|        |         |         |        |        |         |        | 0.043 | 0.064 |       |
|        |         |         |        |        |         |        | 0.012 | 0.023 |       |
|        |         |         |        |        |         |        | 0     | 1.015 |       |
|        |         |         |        |        |         |        | 0.083 | 0.158 |       |
|        |         |         |        |        |         |        | 0.157 | 0.296 |       |
|        |         |         |        |        |         |        | 0.032 | 0.061 |       |
|        |         |         |        |        |         |        | 0.052 | 0.165 |       |
|        |         |         |        |        |         |        | 0.019 | 0.068 |       |

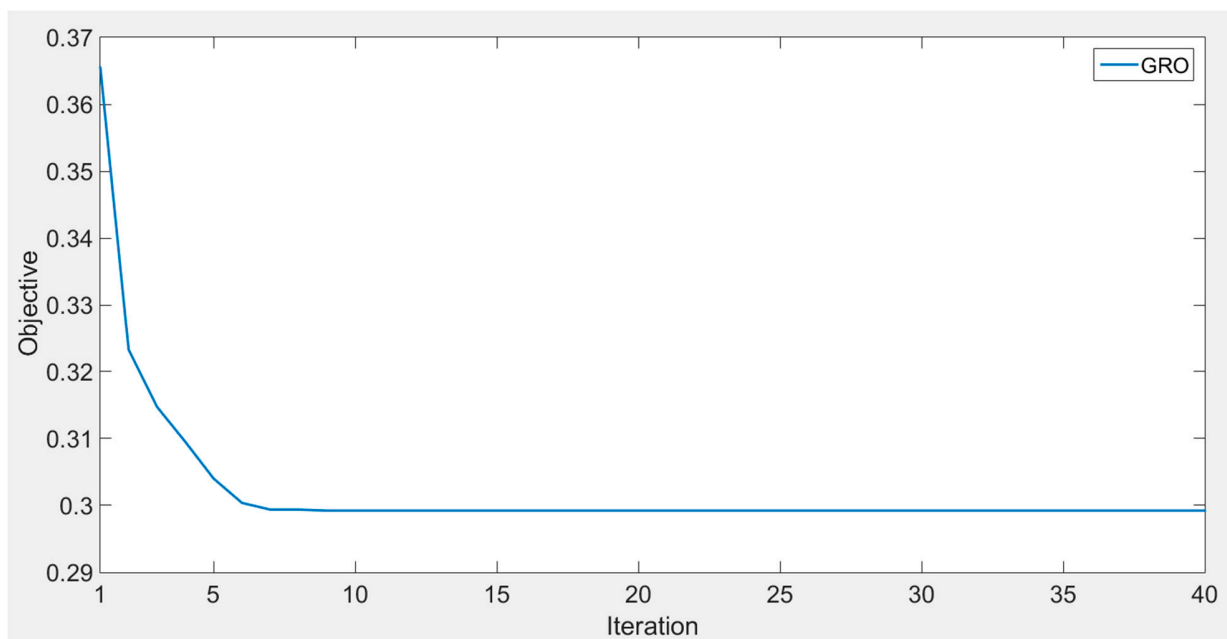

**Figure S55. Algorithm Convergent GRO, 30-bus, and 5DG**

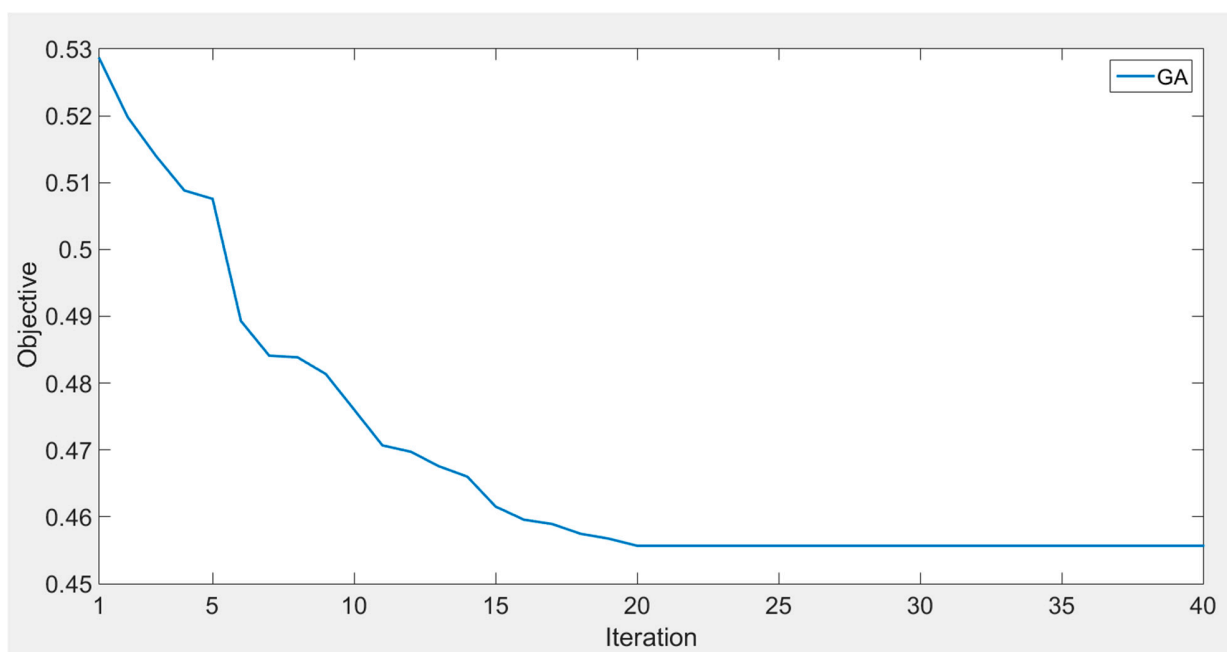

**Figure S56. Algorithm Convergent GA, 30-bus, and 5DG**

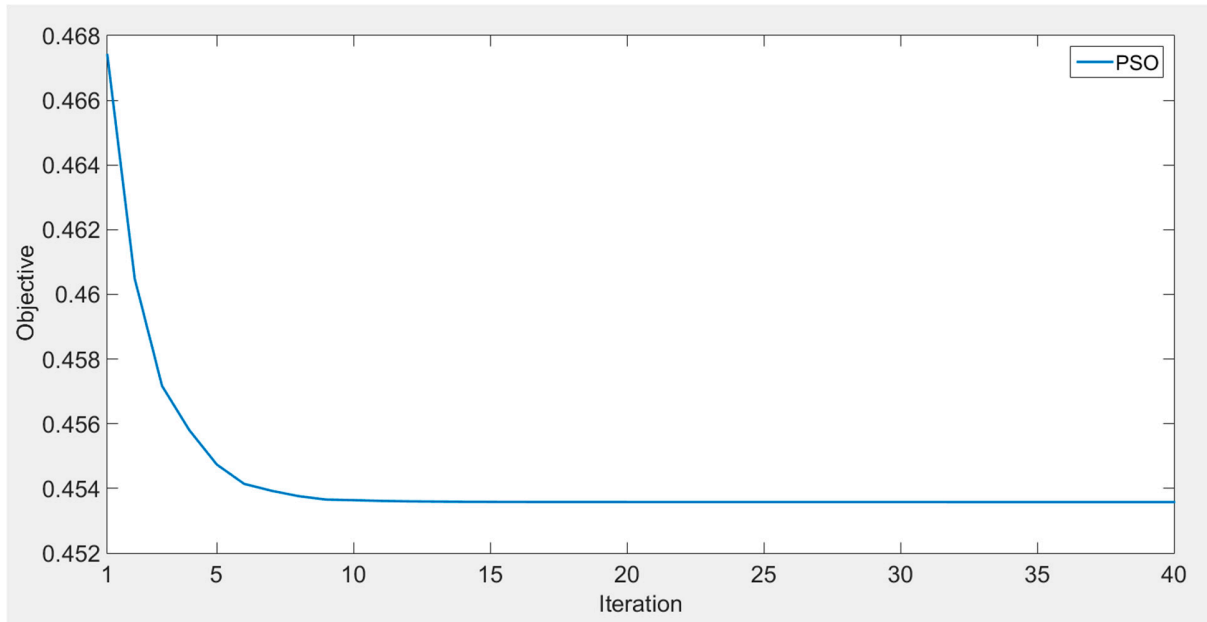

**Figure S57. Algorithm Convergent PSO, 30-bus, and 5DG**

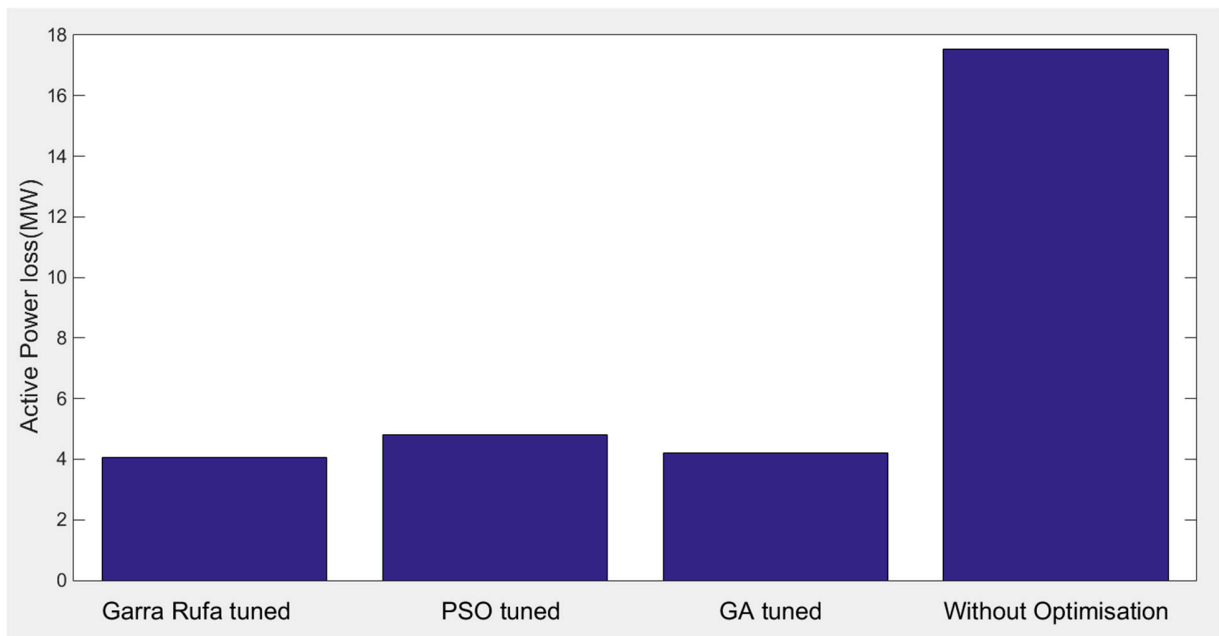

**Figure S58. Active Power Losses 5DG and 30-bus**

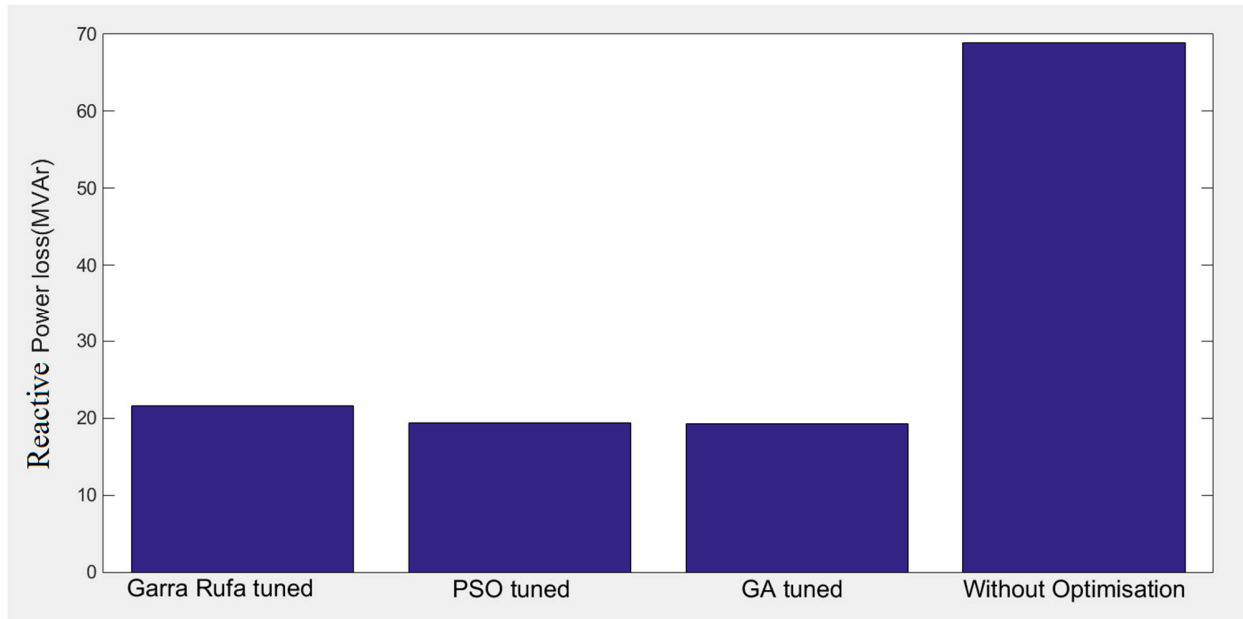

**Figure S59. Reactive Power Losses 5DG and 30-bus**

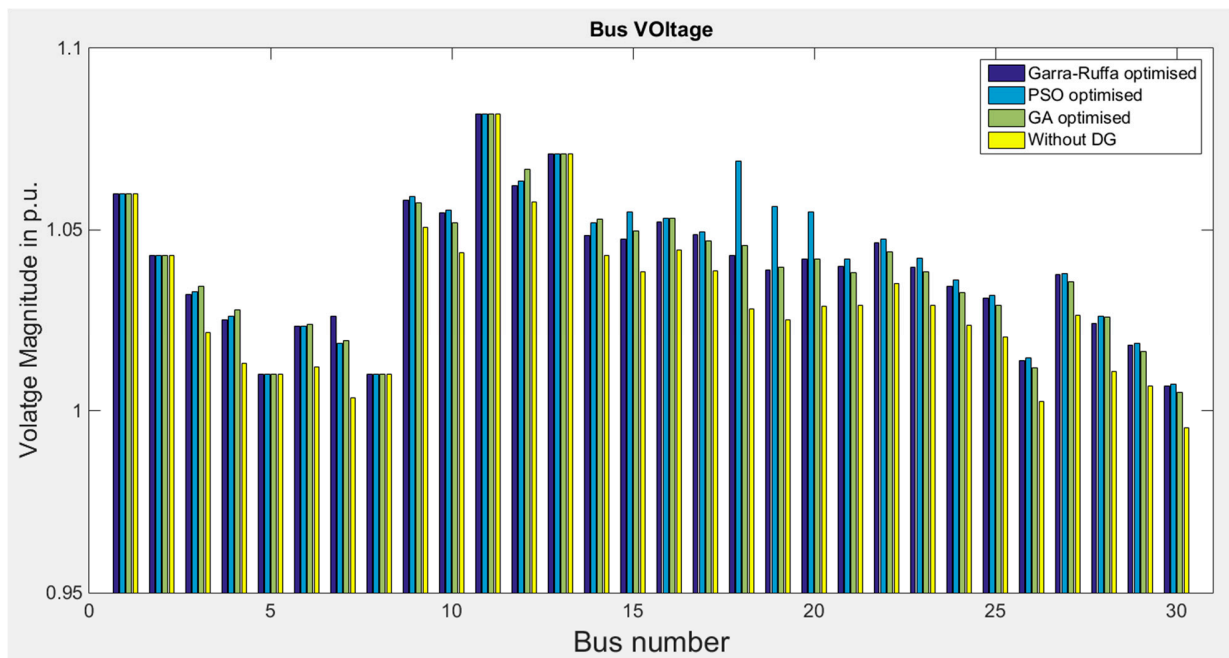

**Figure S60. Voltage Profile 5DG and 30-bus**

**Table S32. load flow results without DG, 30-bus**

| Delta  | Pi      | Qi      | Pg      | Qg      | PI     | QI     | PLs    | QIs    | V      |
|--------|---------|---------|---------|---------|--------|--------|--------|--------|--------|
| 0      | 260.927 | -17.118 | 260.927 | -17.118 | 0      | 0      | 5.178  | 15.509 | 1.060  |
| -0.093 | 18.299  | 35.065  | 39.999  | 47.765  | 21.700 | 12.700 | 3.115  | 11.387 | 1.0430 |
| -0.131 | -2.400  | -1.199  | 0       | 0       | 2.400  | 1.200  | 1.011  | 3.080  | 1.022  |
| -0.162 | -7.599  | -1.599  | 0       | 0       | 7.600  | 1.600  | 0.857  | 2.462  | 1.013  |
| -0.247 | -94.200 | 16.965  | 0       | 35.965  | 94.200 | 19     | 2.945  | 12.374 | 1.010  |
| -0.193 | 0       | 0       | 0       | 0       | 0      | 0      | 1.946  | 5.906  | 1.012  |
| -0.224 | -22.800 | -10.900 | 0       | 0       | 22.800 | 10.900 | 0.641  | 2.231  | 1.000  |
| -0.206 | -29.999 | 0.691   | 0       | 30.691  | 30     | 30     | 0.162  | 0.409  | 1.010  |
| -0.246 | 0       | 0       | 0       | 0       | 0      | 0      | 0.380  | 1.169  | 1.051  |
| -0.274 | -5.800  | 17.00   | 0       | 19.00   | 5.800  | 2      | 0.103  | 0.360  | 1.044  |
| -0.246 | 0       | 16.269  | 0       | 16.269  | 0      | 0      | 0      | 2.213  | 1.082  |
| -0.260 | -11.199 | -7.499  | 0       | 0       | 11.200 | 7.500  | 0      | 1.474  | 1.058  |
| -0.260 | 0       | 10.247  | 0       | 10.247  | 0      | 0      | 0      | 0.470  | 1.071  |
| -0.276 | -6.200  | -1.599  | 0       | 0       | 6.200  | 1.600  | 0      | 0.819  | 1.043  |
| -0.277 | -8.200  | -2.499  | 0       | 0       | 8.200  | 2.500  | 0      | 5.188  | 1.038  |
| -0.271 | -3.500  | -1.799  | 0       | 0       | 3.500  | 1.800  | 0      | 0.128  | 1.046  |
| -0.277 | -8.999  | -5.799  | 0       | 0       | 9      | 5.800  | 0.073  | 0.151  | 1.039  |
| -0.288 | -3.200  | -0.900  | 0       | 0       | 3.200  | 0.900  | 0.210  | 0.415  | 1.028  |
| -0.291 | -9.500  | -3.400  | 0       | 0       | 9.500  | 3.400  | 0.057  | 0.121  | 1.025  |
| -0.288 | -2.199  | -0.699  | 0       | 0       | 2.200  | 0.700  | 0.005  | 0.004  | 1.029  |
| -0.283 | -17.499 | -11.199 | 0       | 0       | 17.500 | 11.200 | 0.013  | 0.031  | 1.029  |
| -0.280 | 0       | 0       | 0       | 0       | 0      | 0      | 0.042  | 0.086  | 1.035  |
| -0.283 | -3.200  | -1.600  | 0       | 0       | 3.200  | 1.600  | 0.006  | 0.012  | 1.029  |
| -0.286 | -8.700  | -2.400  | 0       | 4.299   | 8.700  | 6.700  | 0.015  | 0.031  | 1.024  |
| -0.280 | 0       | 0       | 0       | 0       | 0      | 0      | 0.076  | 0.169  | 1.020  |
| -0.287 | -3.500  | -2.299  | 0       | 0       | 3.500  | 2.300  | 0.013  | 0.034  | 1.003  |
| -0.271 | 0       | 0       | 0       | 0       | 0      | 0      | 0.151  | 0.325  | 1.027  |
| -0.204 | 0       | 0       | 0       | 0       | 0      | 0      | 0.028  | 0.059  | 1.011  |
| -0.292 | -2.400  | -0.899  | 0       | 0       | 2.400  | 0.900  | 0      | 0.0001 | 1.007  |
| -0.308 | -10.600 | -1.899  | 0       | 0       | 10.600 | 1.900  | 0.024  | 0.049  | 0.995  |
|        |         |         |         |         |        |        | 0.045  | 0.070  |        |
|        |         |         |         |         |        |        | 0.006  | 0.012  |        |
|        |         |         |         |         |        |        | 0.007  | 0.013  |        |
|        |         |         |         |         |        |        | 0.044  | 0.066  |        |
|        |         |         |         |         |        |        | 0.023  | 0.044  |        |
|        |         |         |         |         |        |        | 0      | 1.261  |        |
|        |         |         |         |         |        |        | 0.085  | 0.161  |        |
|        |         |         |         |         |        |        | 0.161  | 0.303  |        |
|        |         |         |         |         |        |        | 0.033  | 0.062  |        |
|        |         |         |         |         |        |        | 0.0002 | 0.0008 |        |
|        |         |         |         |         |        |        | 0.059  | 0.209  |        |
